# Supplementary material for: TfOH-Promoted Reaction of 2,4-Diaryl-1,1,1-Trifluorobut-3-yn-2-oles with Arenes: Synthesis of 1,3-Diaryl-1-CF3-Indenes and Versatility of the Reaction Mechanisms
Source: Molecules. 2018 Nov 25;23(12):3079. doi: 10.3390/molecules23123079 (PMC6321356; doi:10.3390/molecules23123079)
Supplement: Supplementary file 1 [file molecules-23-03079-s001.zip]

Archive with 16 entries (16 files):
- supplyment/checkcif 4bg.pdf
- supplyment/checkcif 4ci.pdf
- supplyment/checkcif 4dc.pdf
- supplyment/checkcif 4df.pdf
- supplyment/checkcif 4dg.pdf
- supplyment/checkcif 4dk.pdf
- supplyment/checkcif 4dm.pdf
- supplyment/checkcif 4fb.pdf
- supplyment/checkcif 4fc.pdf
- supplyment/checkcif 4fh.pdf
- supplyment/checkcif 4fk.pdf
- supplyment/checkcif 5ac.pdf
- supplyment/checkcif4de.pdf
- supplyment/SI part 1-edited.doc
- supplyment/SI part 2-edited.docx
- supplyment/SI part 3-1-edited.doc
