# Supplementary material for: TfOH-Promoted Reaction of 2,4-Diaryl-1,1,1-Trifluorobut-3-yn-2-oles with Arenes: Synthesis of 1,3-Diaryl-1-CF3-Indenes and Versatility of the Reaction Mechanisms
Source: Molecules. 2018 Nov 25;23(12):3079. doi: 10.3390/molecules23123079 (PMC6321356; doi:10.3390/molecules23123079)
Supplement: Supplementary file 1 [file molecules-23-03079-s001.zip › supplyment/SI part 2-edited.docx]

**Original-NMR spectra (1H, 13C, DEPT, 19F, NOESY-HH and NOESY-HF)**


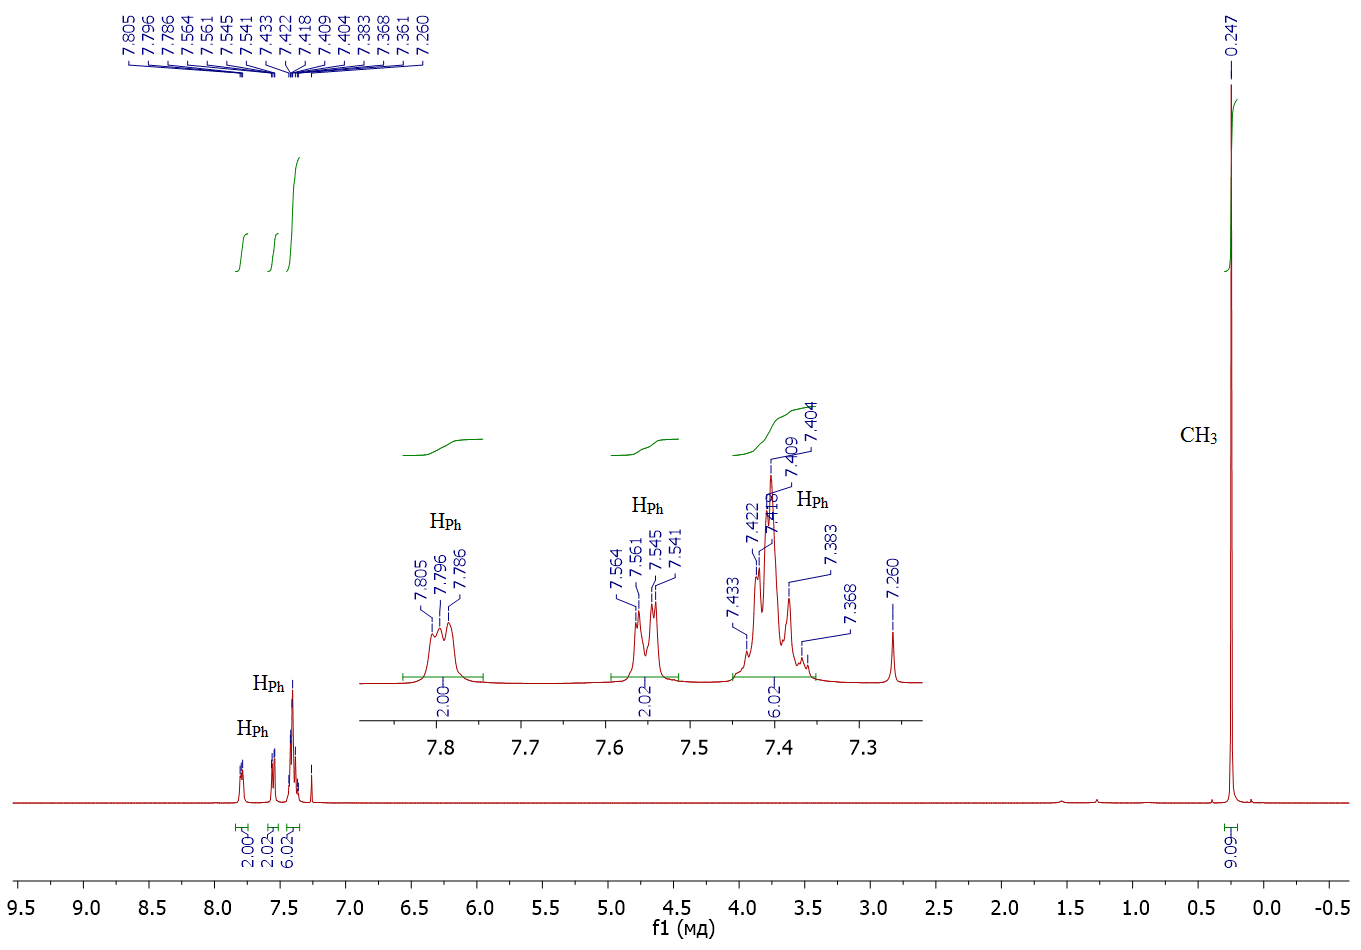


Figure S1. 1Н-NMR spectrum of the compound **Ia** (CDCl3, 400 MHz).


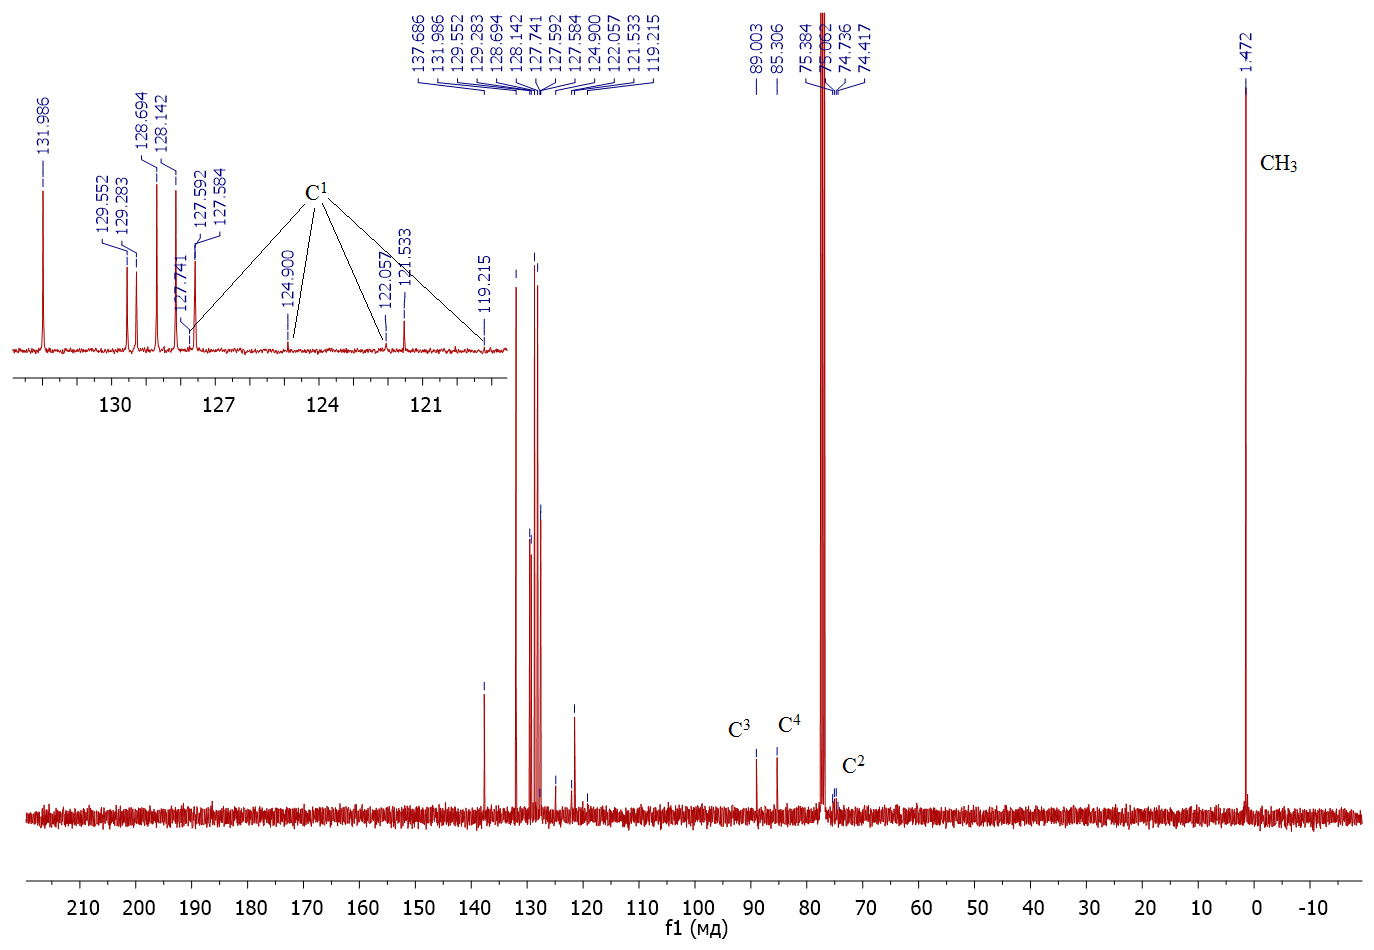


Figure S2. 13C-NMR spectrum of the compound **Ia** (CDCl3, 100 MHz).


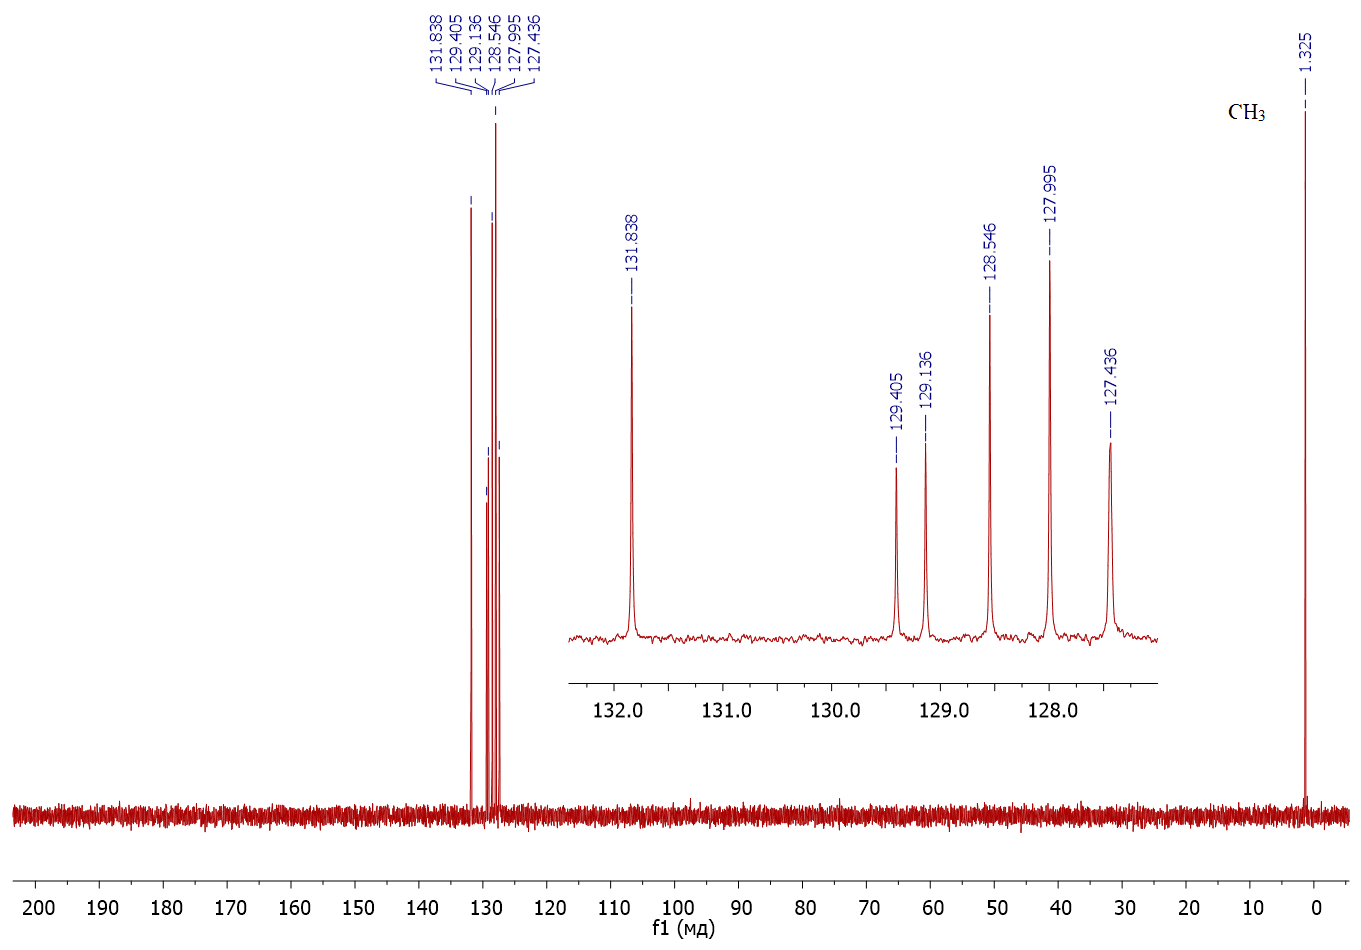


Figure S3. DEPT spectrum of the compound **Ia** (CDCl3, 100 MHz).


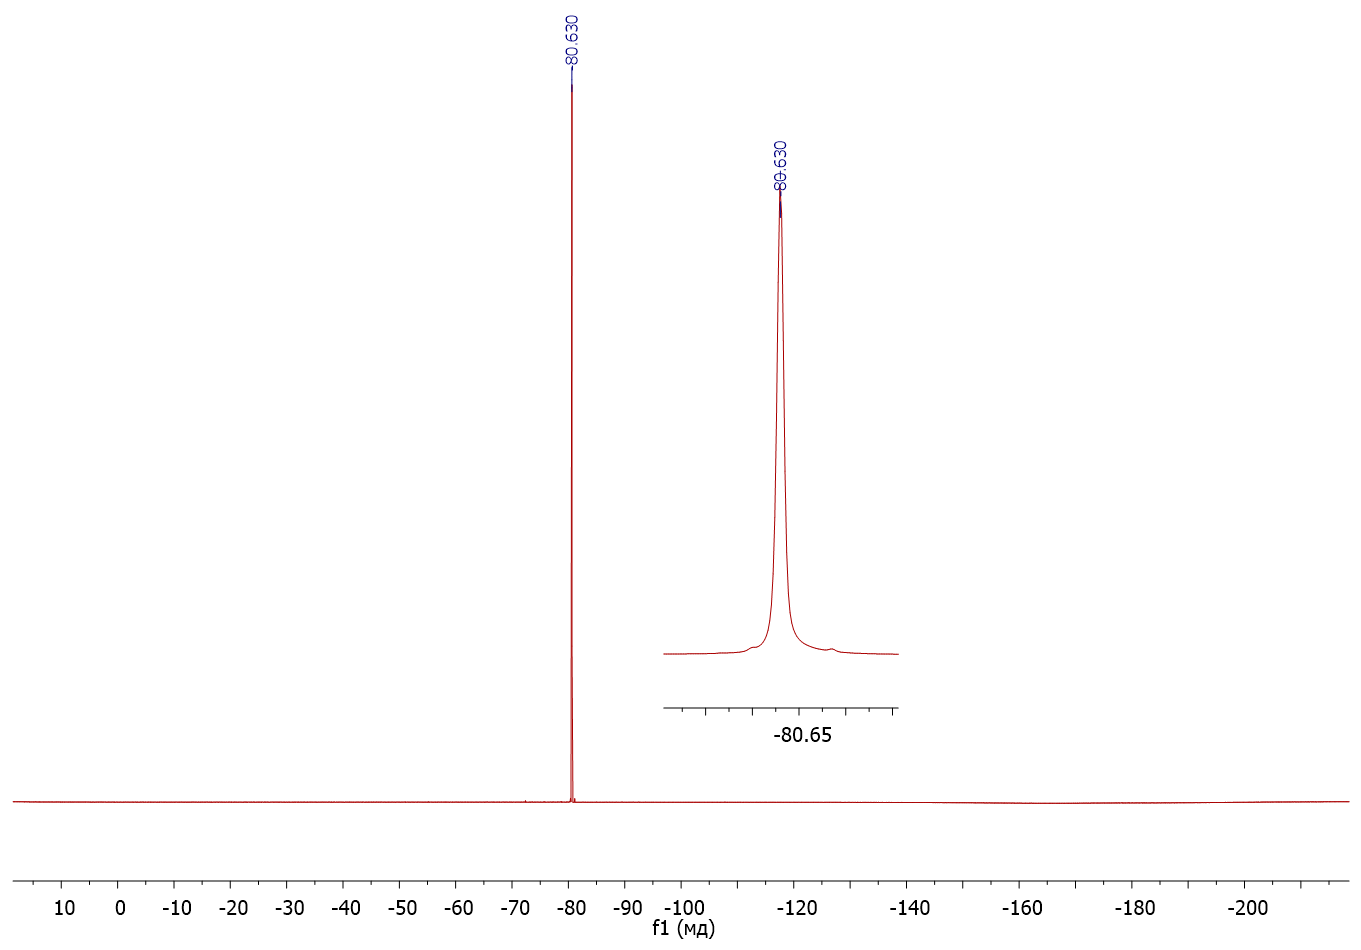


Figure S4. 19F-NMR spectrum of the compound **Ia** (CDCl3, 376 MHz).


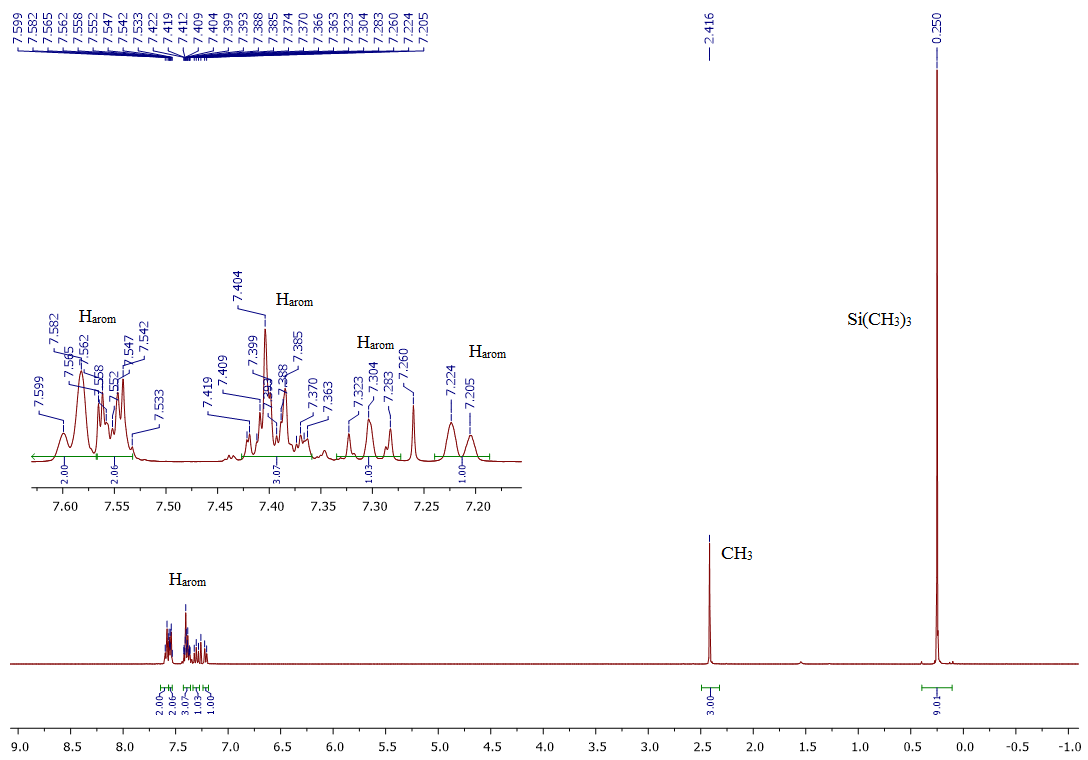


Figure S5. 1Н-NMR spectrum of the compound **Ib** (CDCl3, 400 MHz).


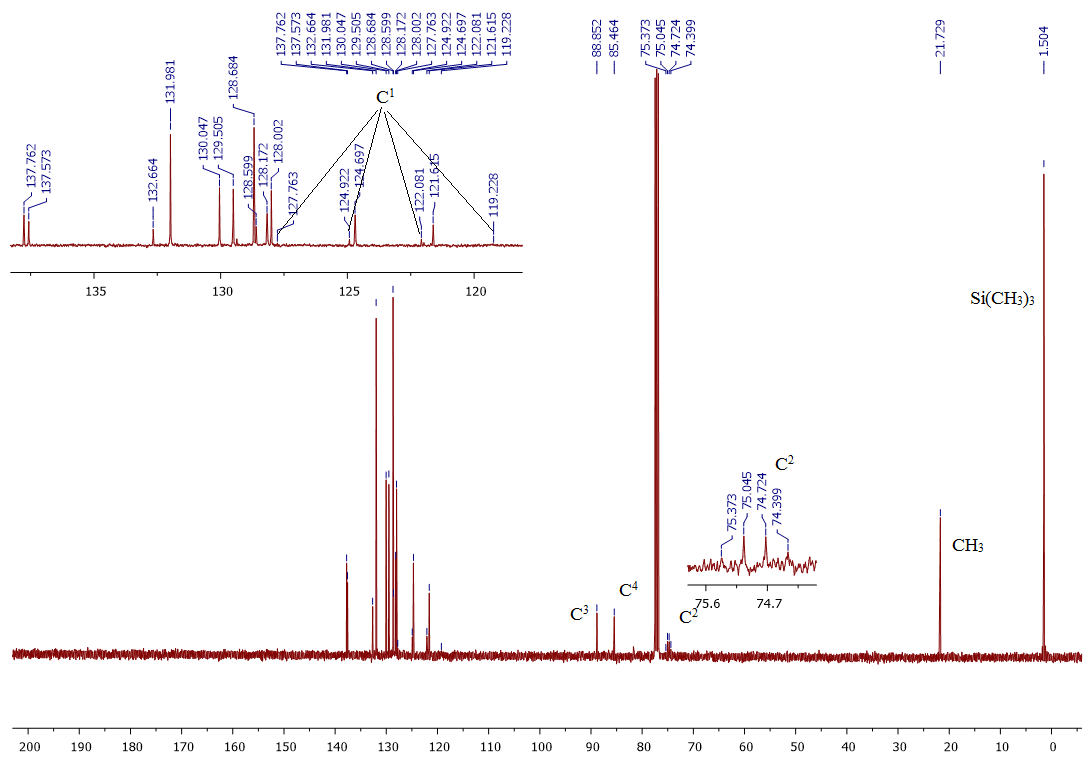


Figure S6. 13C-NMR spectrum of the compound **Ib** (CDCl3, 100 MHz).


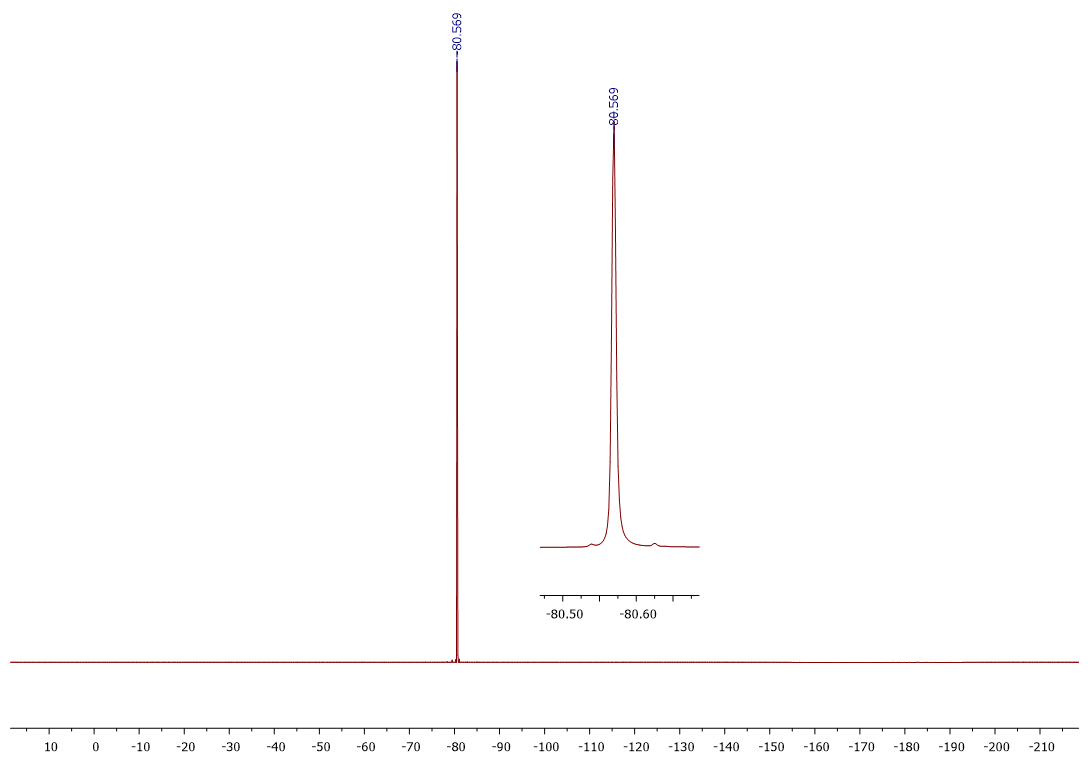


Figure S7. 19F-NMR spectrum of the compound **Ib** (CDCl3, 376 MHz).


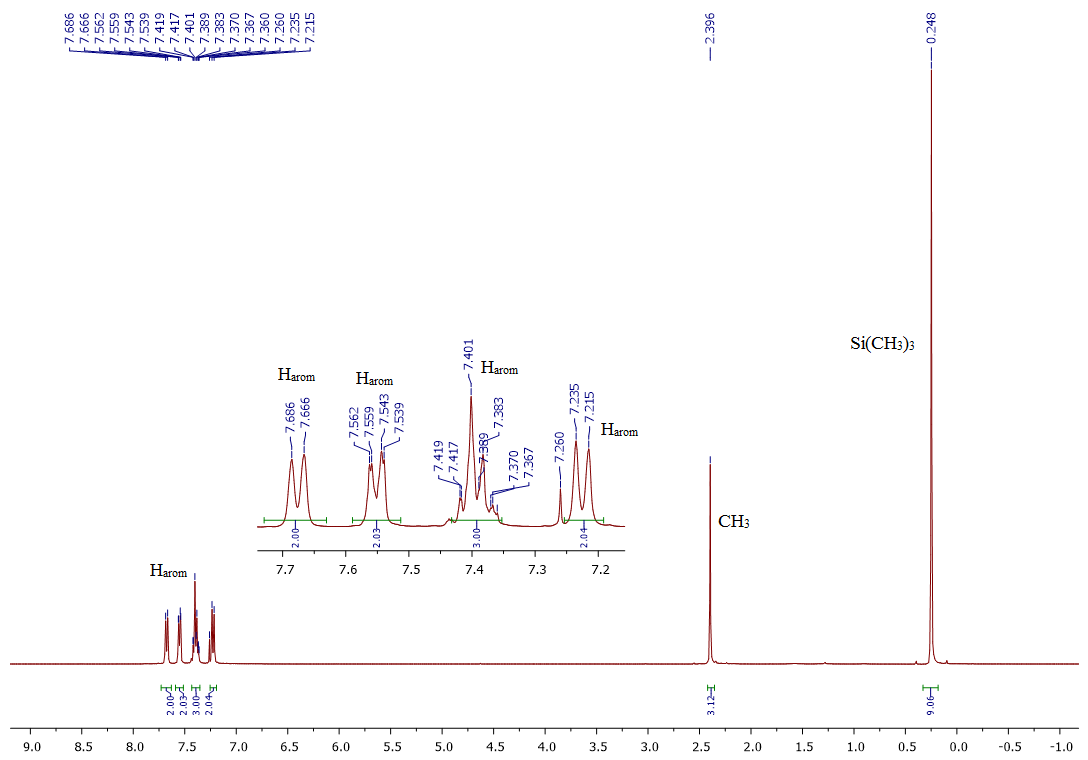


Figure S8. 1Н-NMR spectrum of the compound **Ic** (CDCl3, 400 MHz).


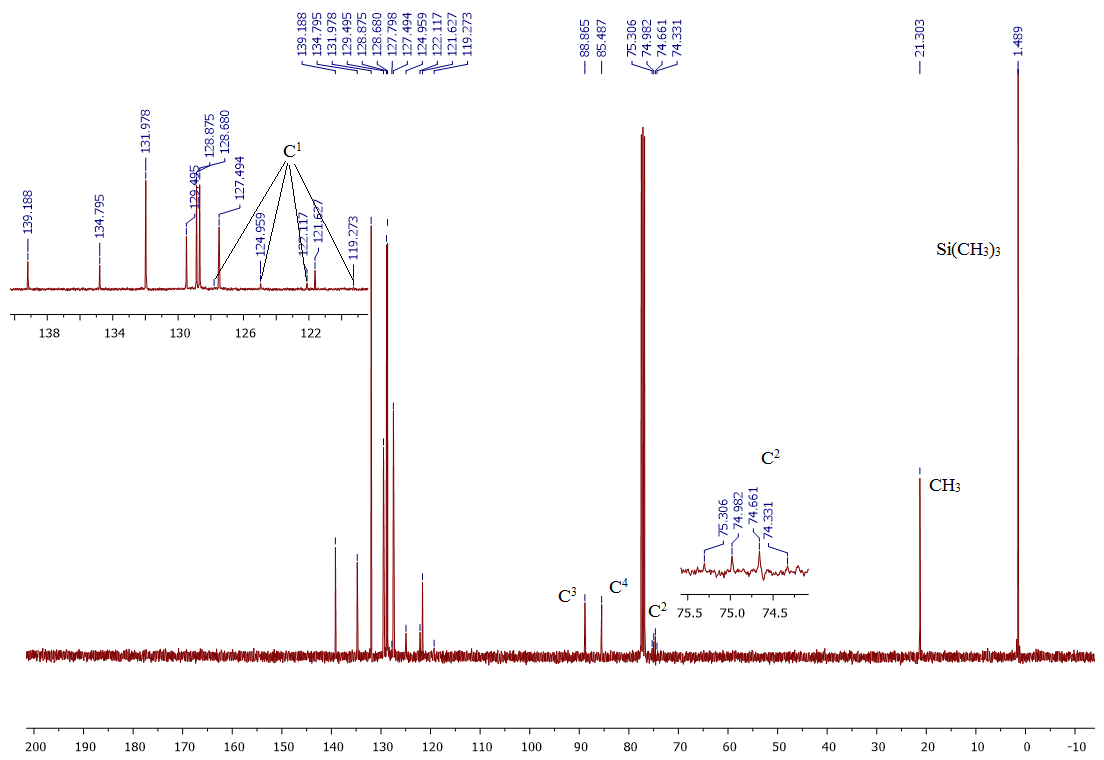


Figure S9. 13C-NMR spectrum of the compound **Ic** (CDCl3, 100 MHz).


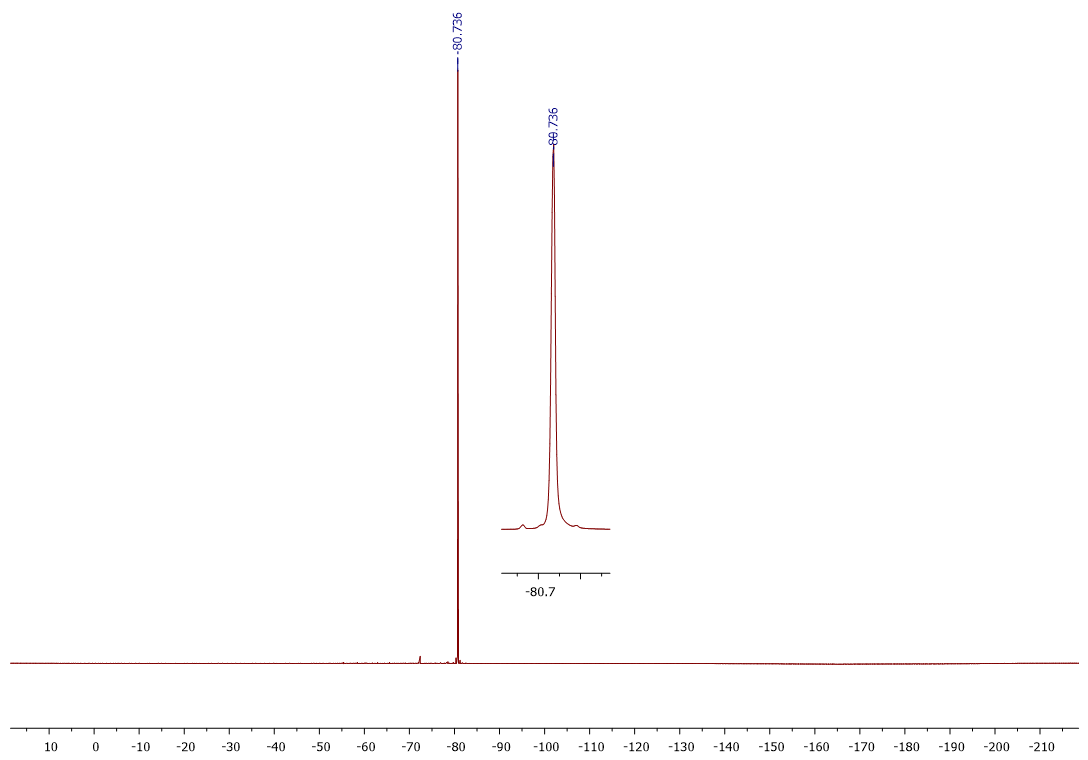


Figure S10. 19F-NMR spectrum of the compound **Ic** (CDCl3, 376 MHz).


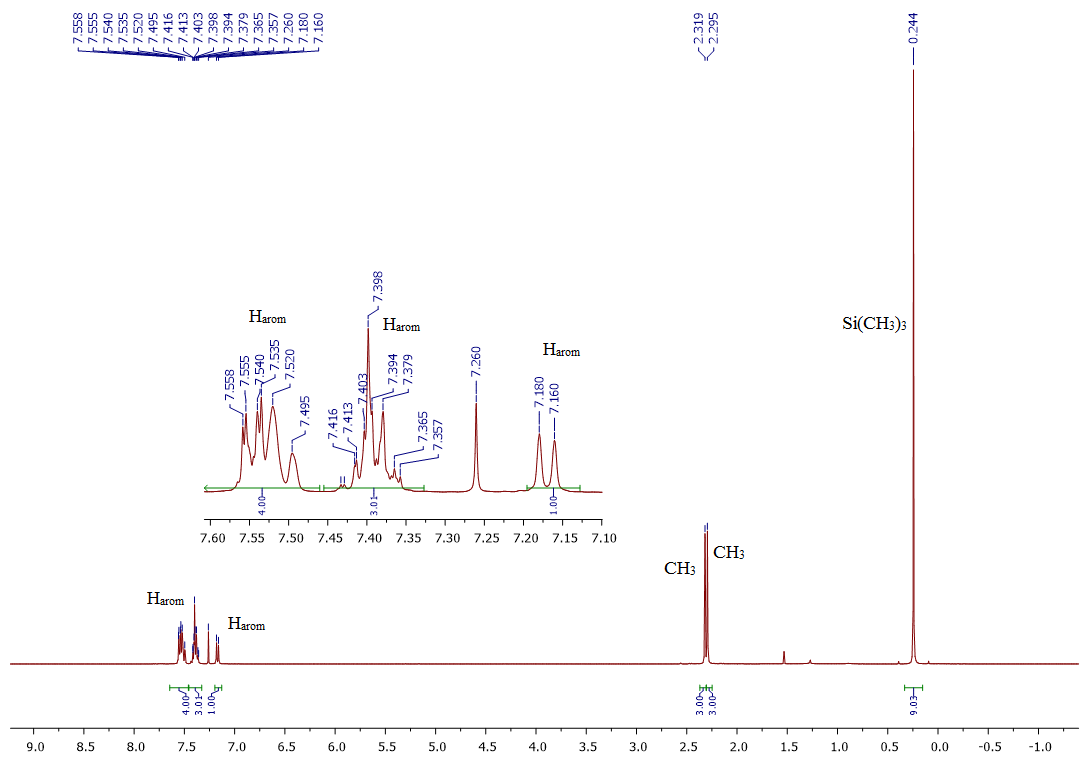


Figure S11. 1Н-NMR spectrum of the compound **Id** (CDCl3, 400 MHz).


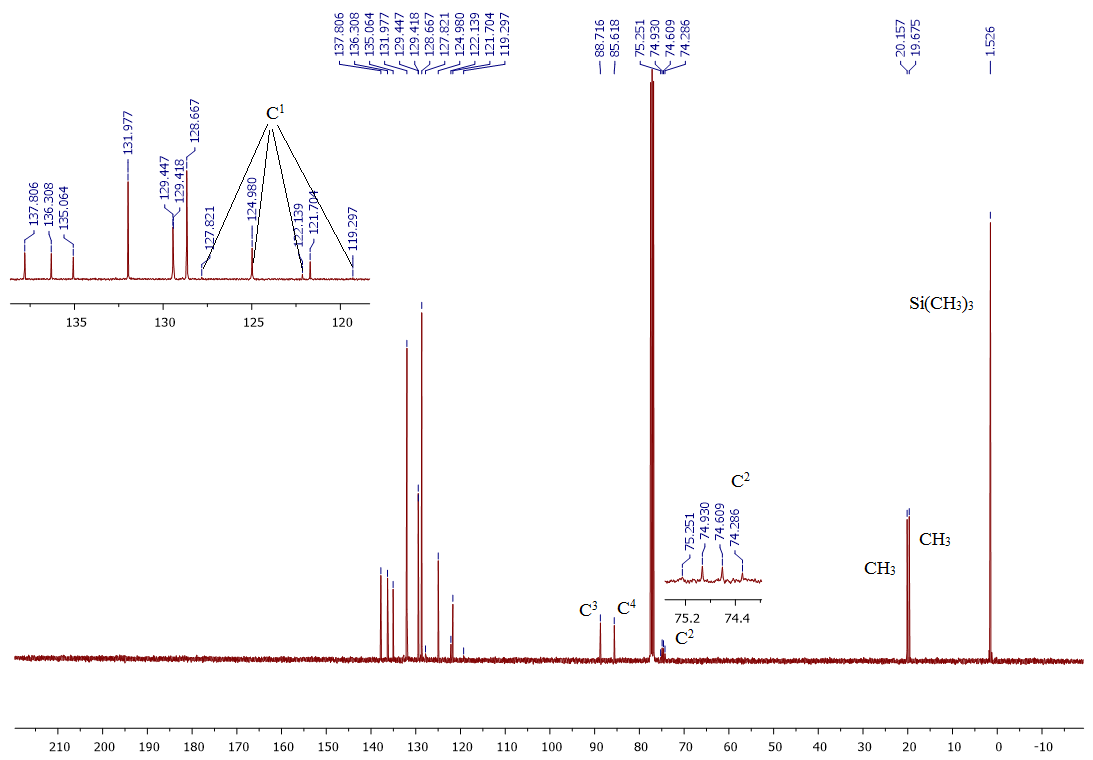


Figure S12. 13C-NMR spectrum of the compound **Id** (CDCl3, 100 MHz).


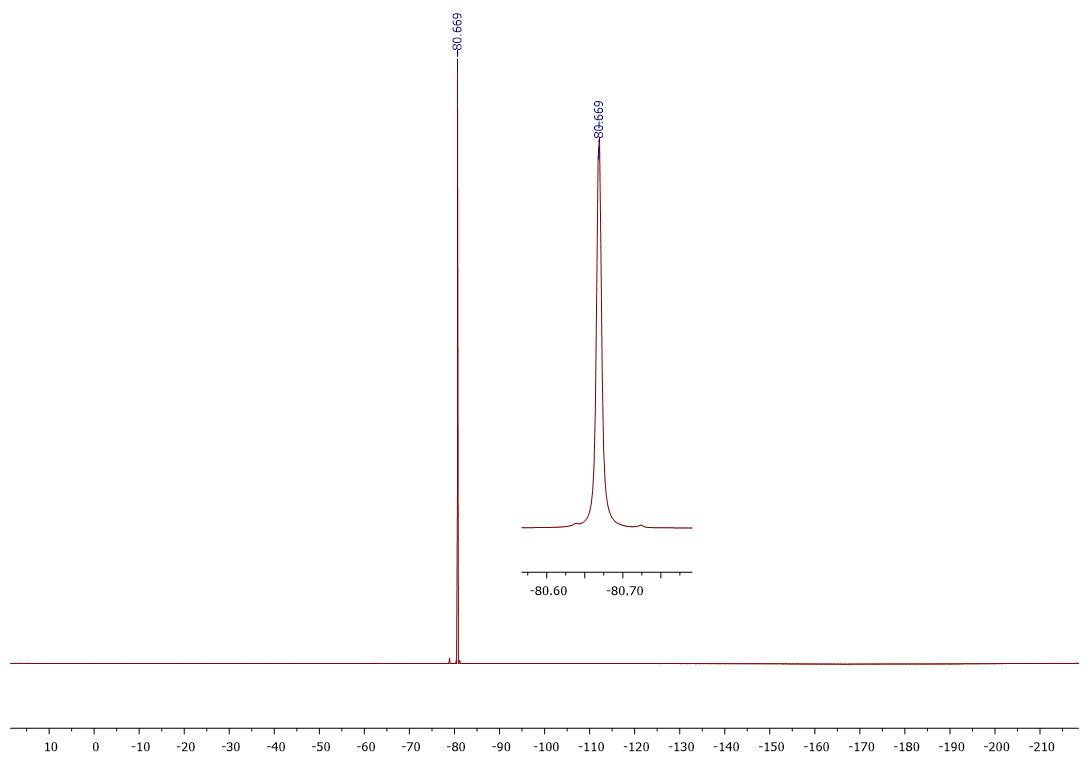


Figure S13. 19F-NMR spectrum of the compound **Id** (CDCl3, 376 MHz).


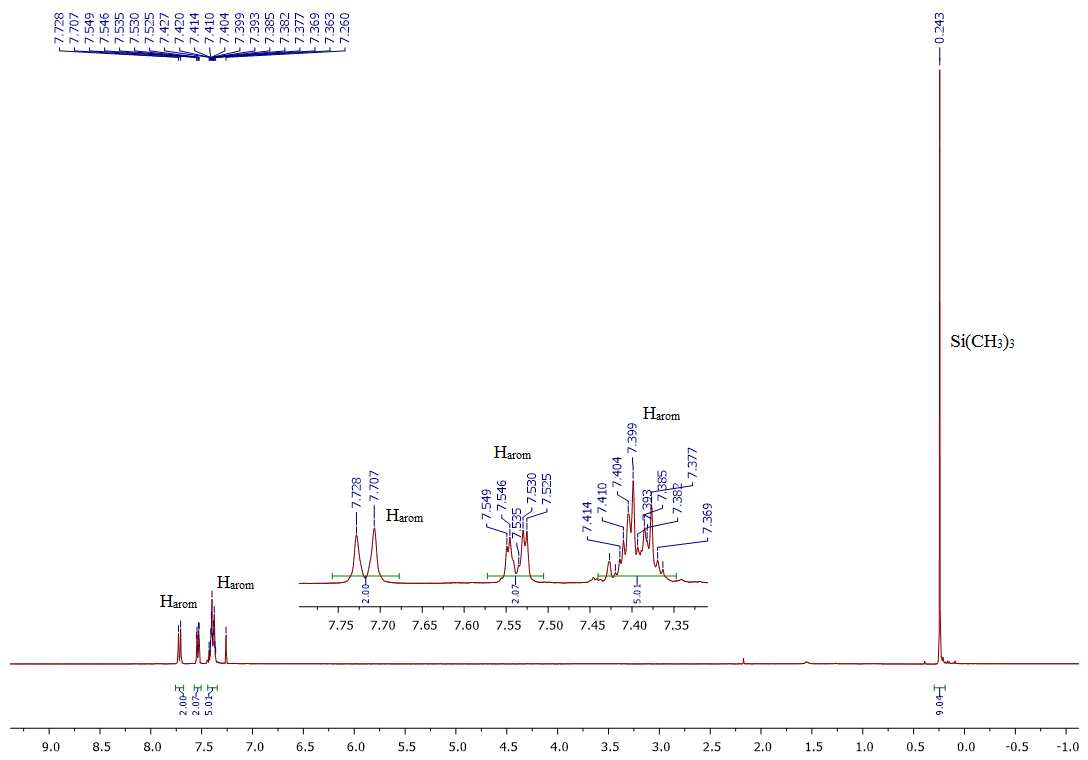


Figure S14. 1Н-NMR spectrum of the compound **Ie** (CDCl3, 400 MHz).


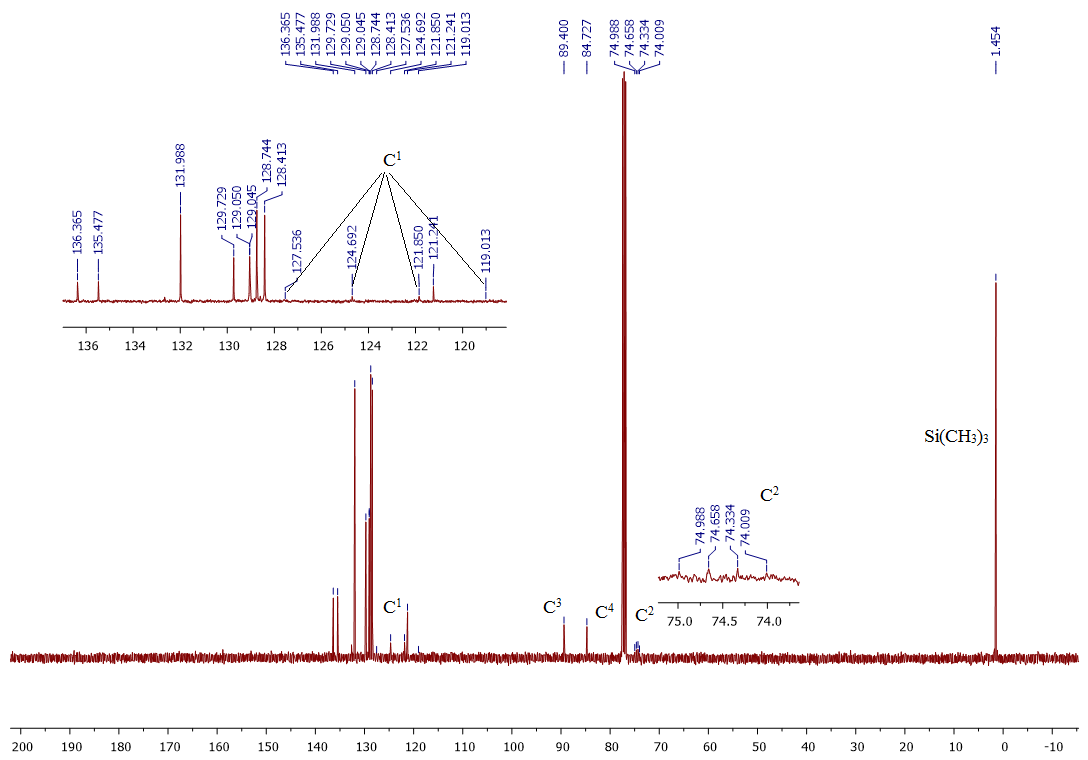


Figure S15. 13C-NMR spectrum of the compound **Ie** (CDCl3, 100 MHz).


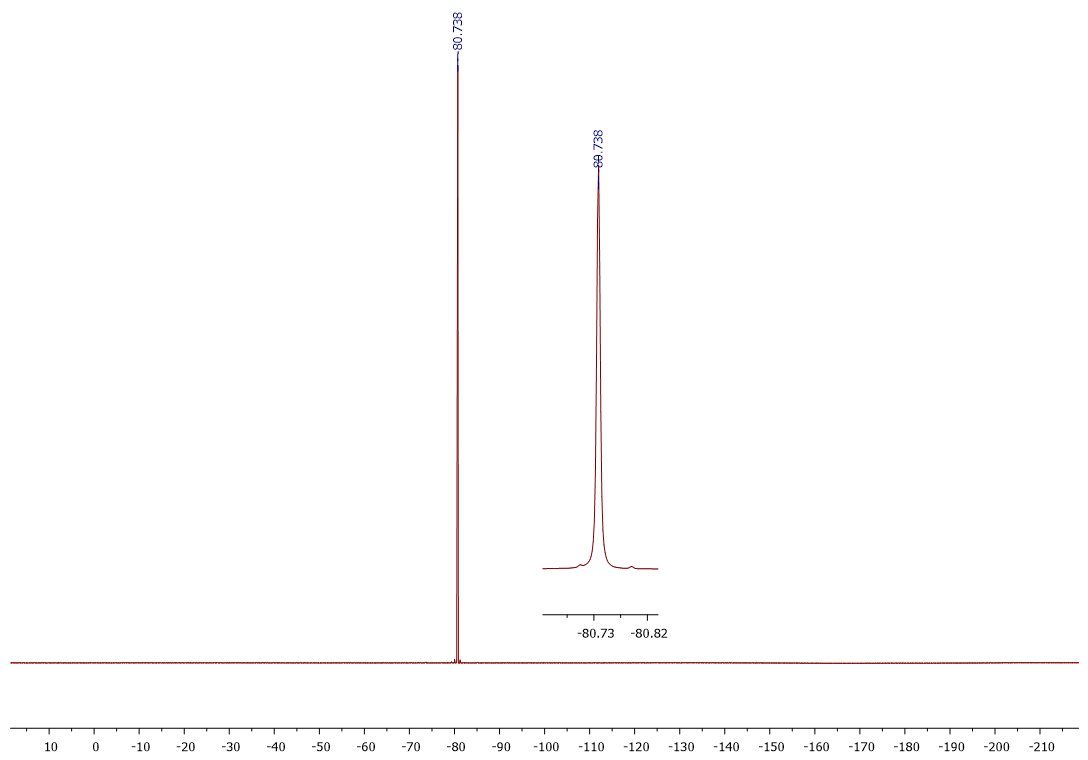


Figure S16. 19F-NMR spectrum of the compound **Ie** (CDCl3, 376 MHz).


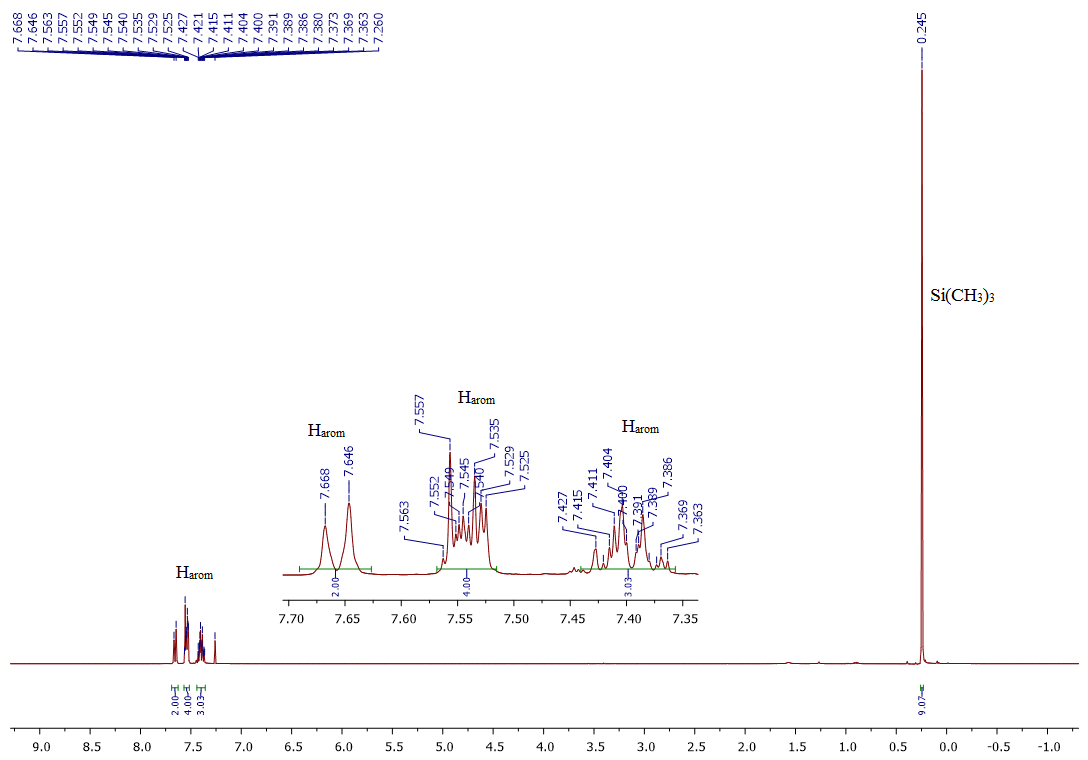


Figure S17. 1Н-NMR spectrum of the compound **If** (CDCl3, 400 MHz).


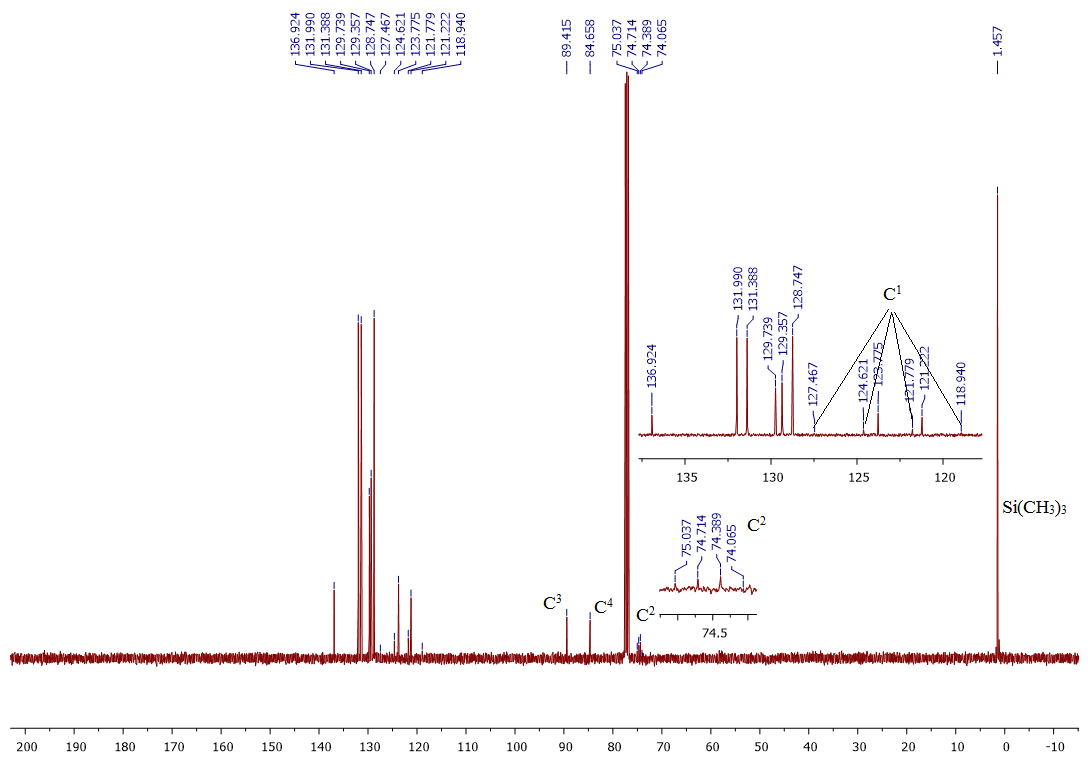


Figure S18. 13C-NMR spectrum of the compound **If** (CDCl3, 100 MHz).


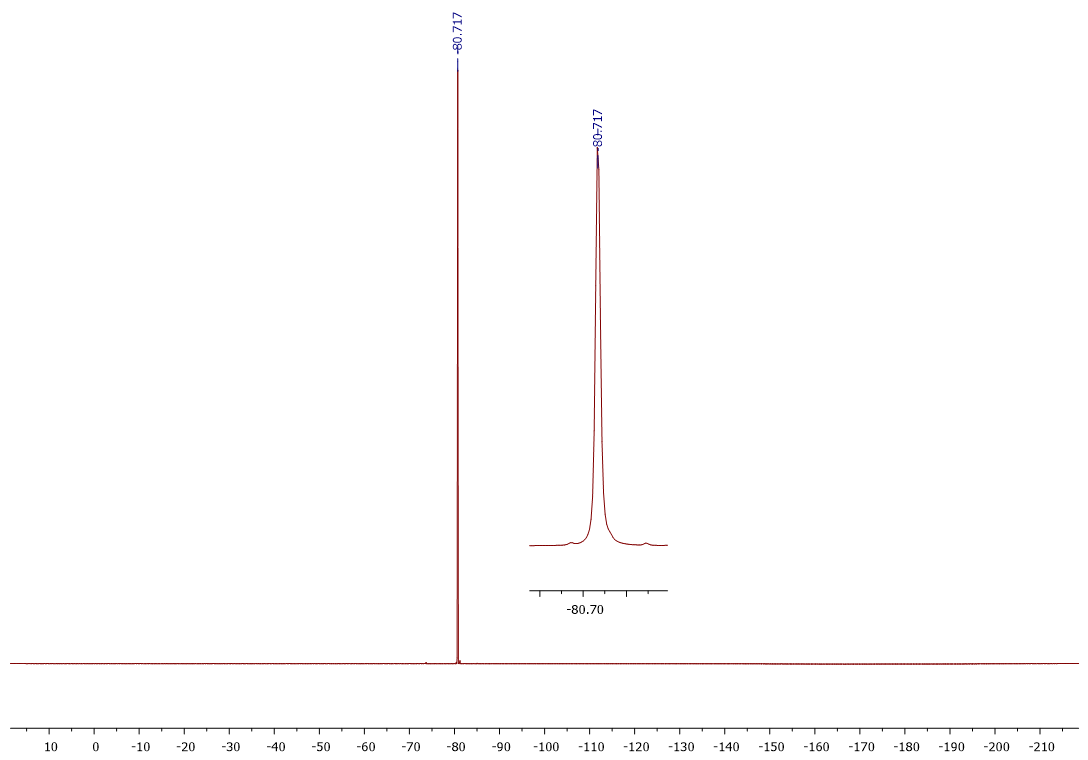


Figure S19. 19F-NMR spectrum of the compound **If** (CDCl3, 376 MHz).


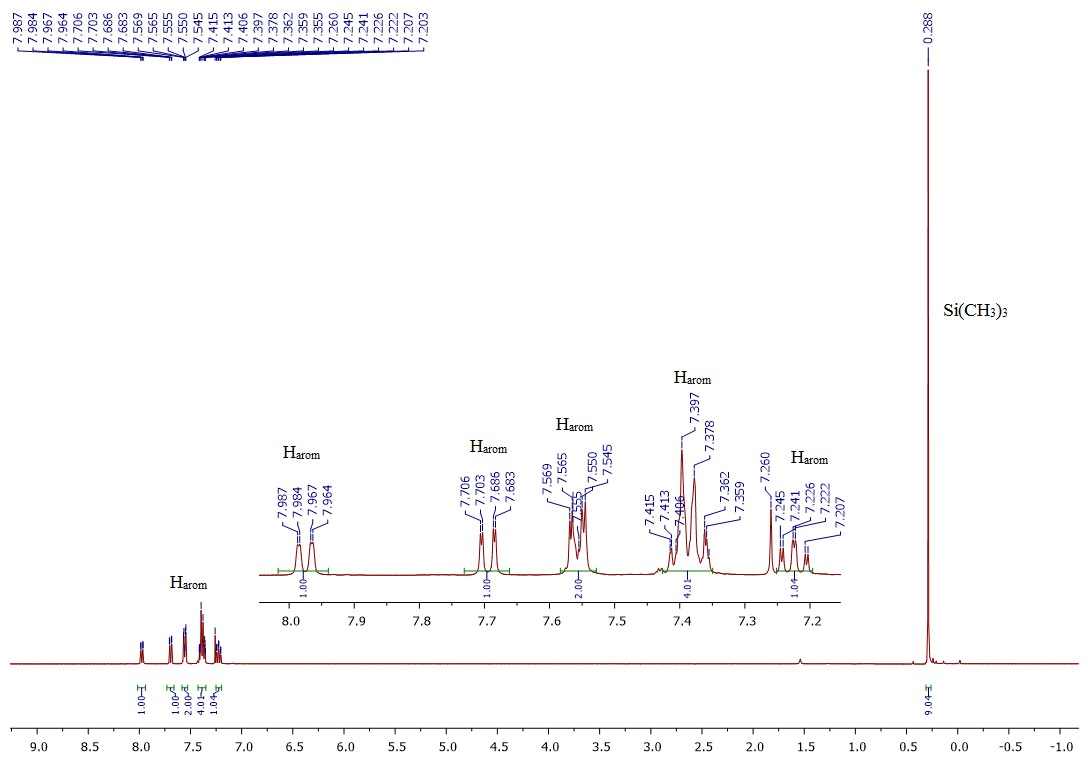


Figure S20. 1Н-NMR spectrum of the compound **Ig** (CDCl3, 400 MHz).


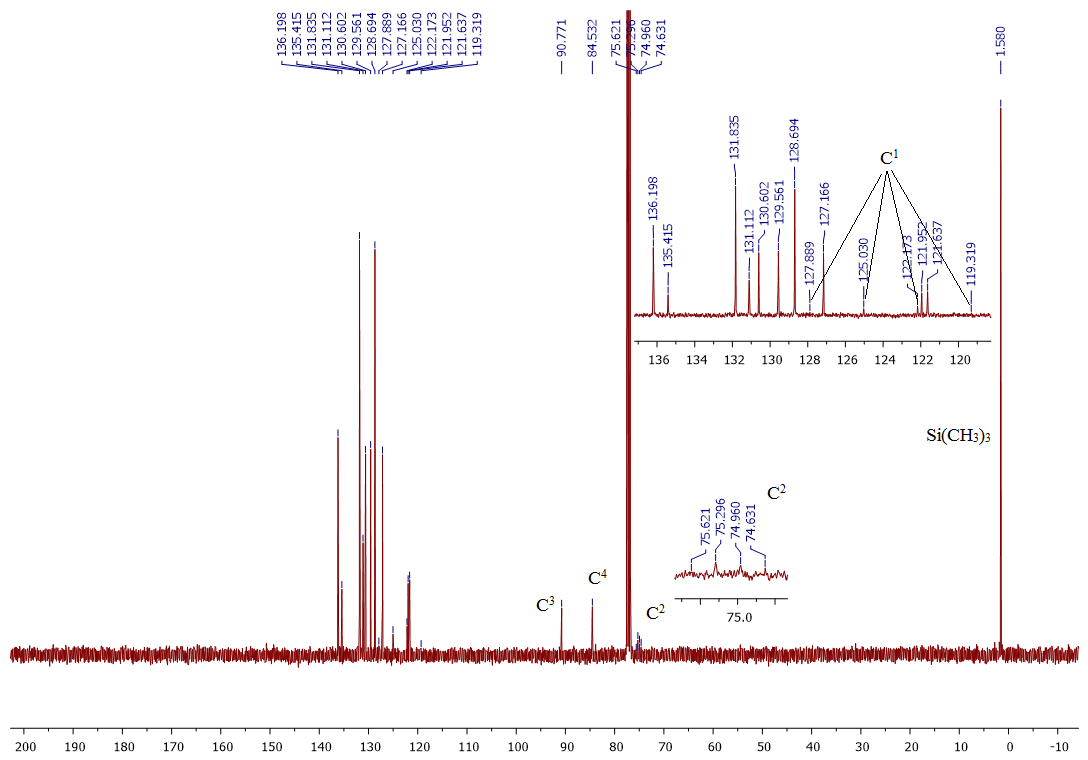


Figure S21. 13C-NMR spectrum of the compound **Ig** (CDCl3, 100 MHz).


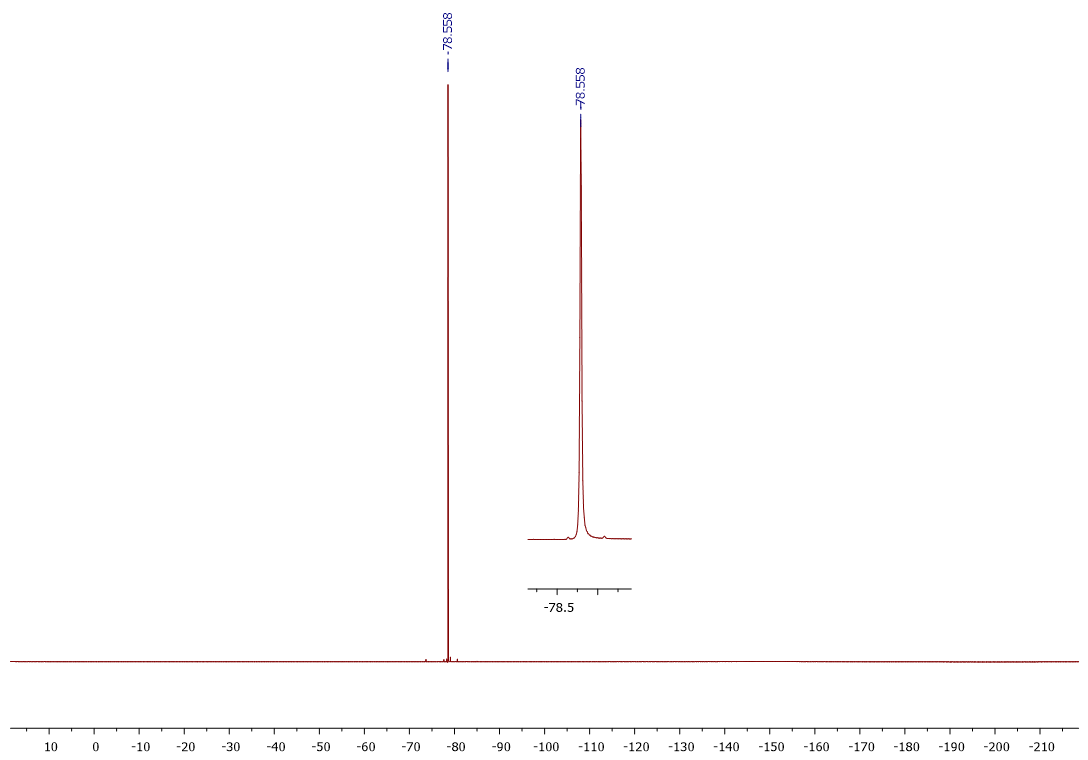


Figure S22. 19F-NMR spectrum of the compound **Ig** (CDCl3, 376 MHz).


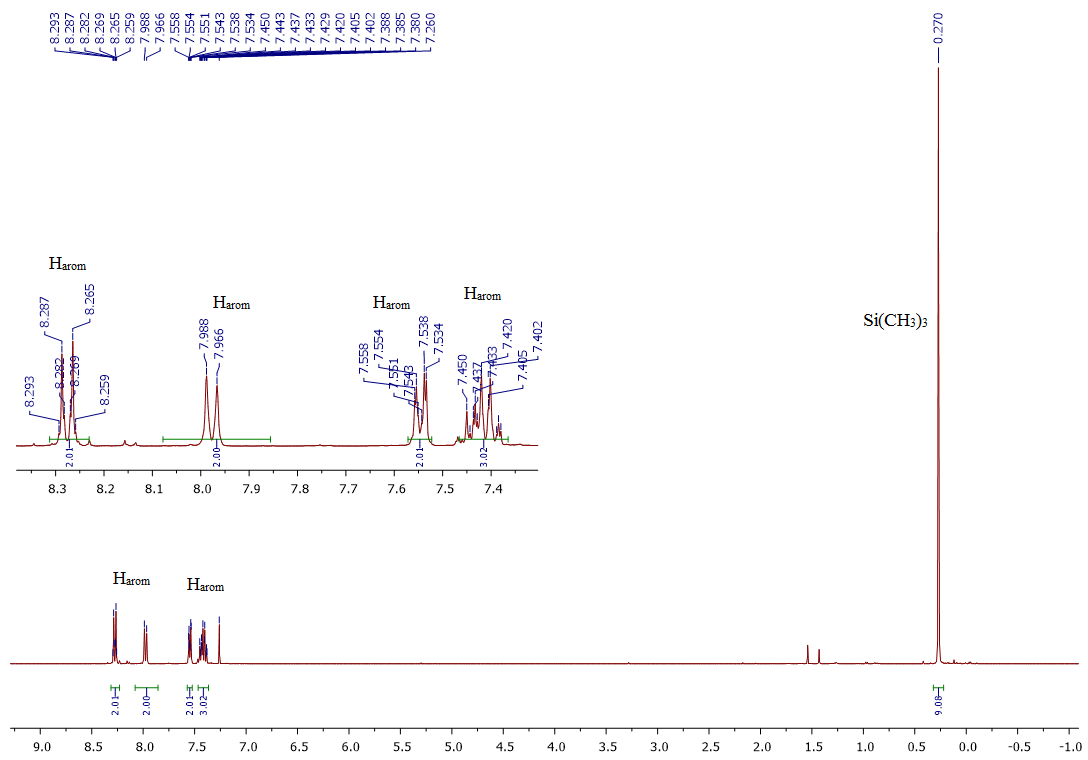


Figure S23. 1Н-NMR spectrum of the compound **Ih** (CDCl3, 400 MHz).


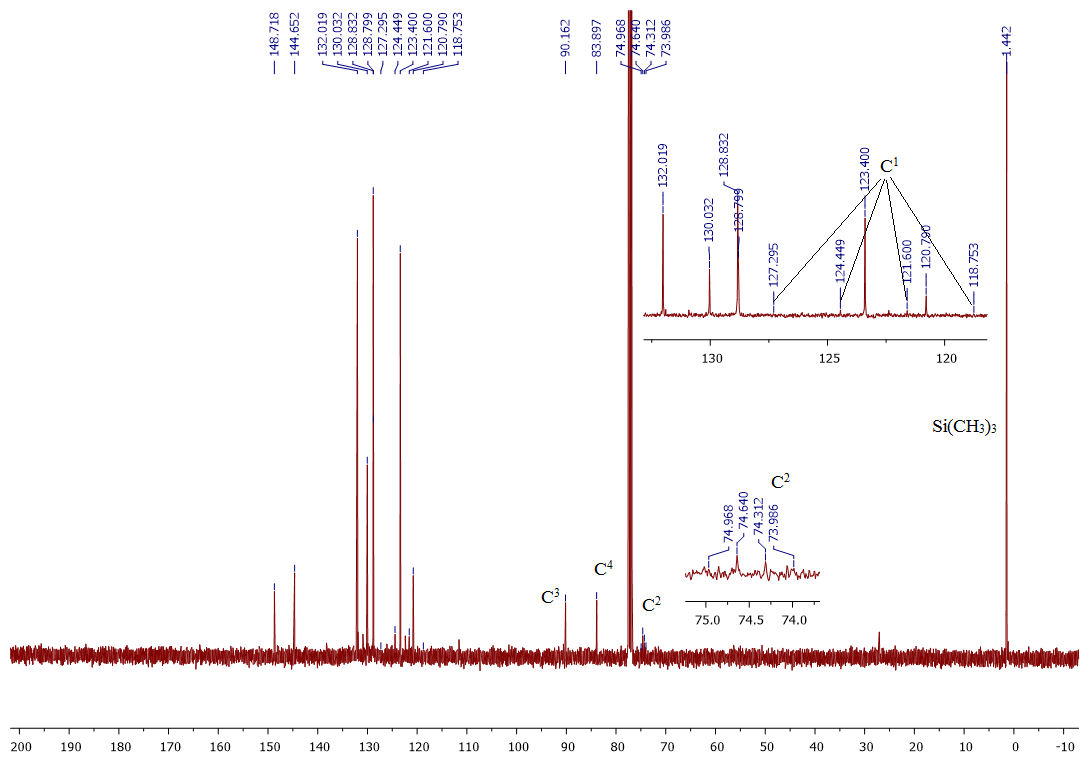


Figure S24. 13C-NMR spectrum of the compound **Ih** (CDCl3, 100 MHz).


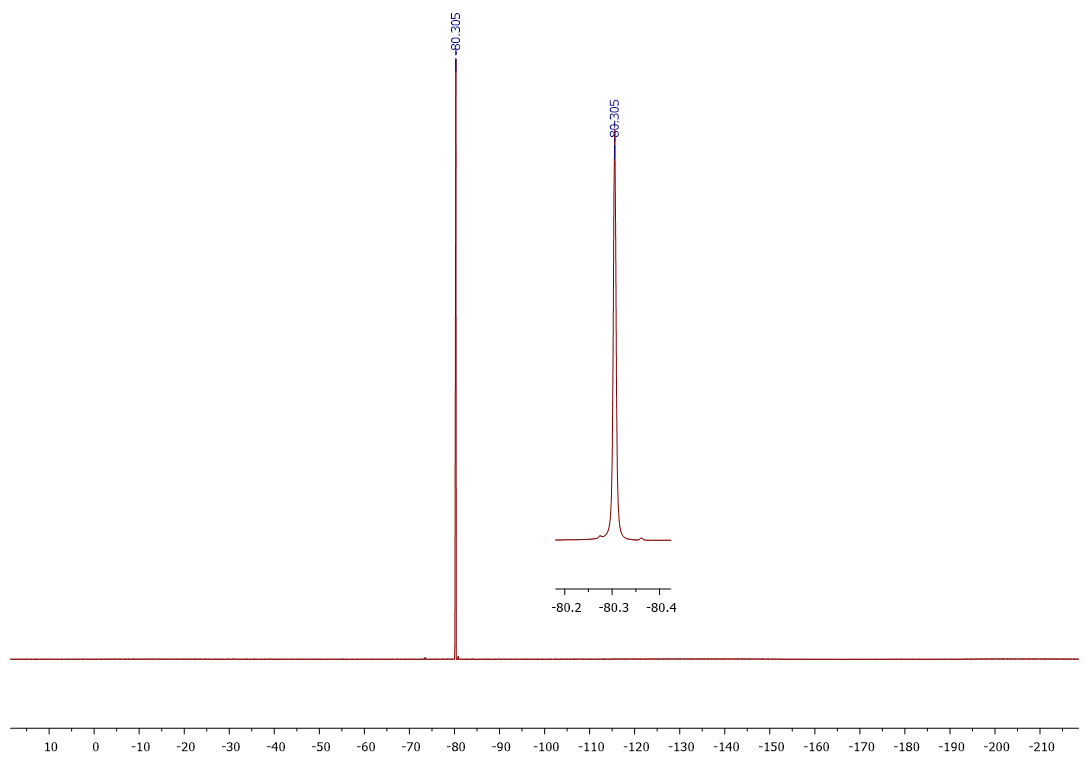


Figure S25. 19F-NMR spectrum of the compound **Ih** (CDCl3, 376 MHz).


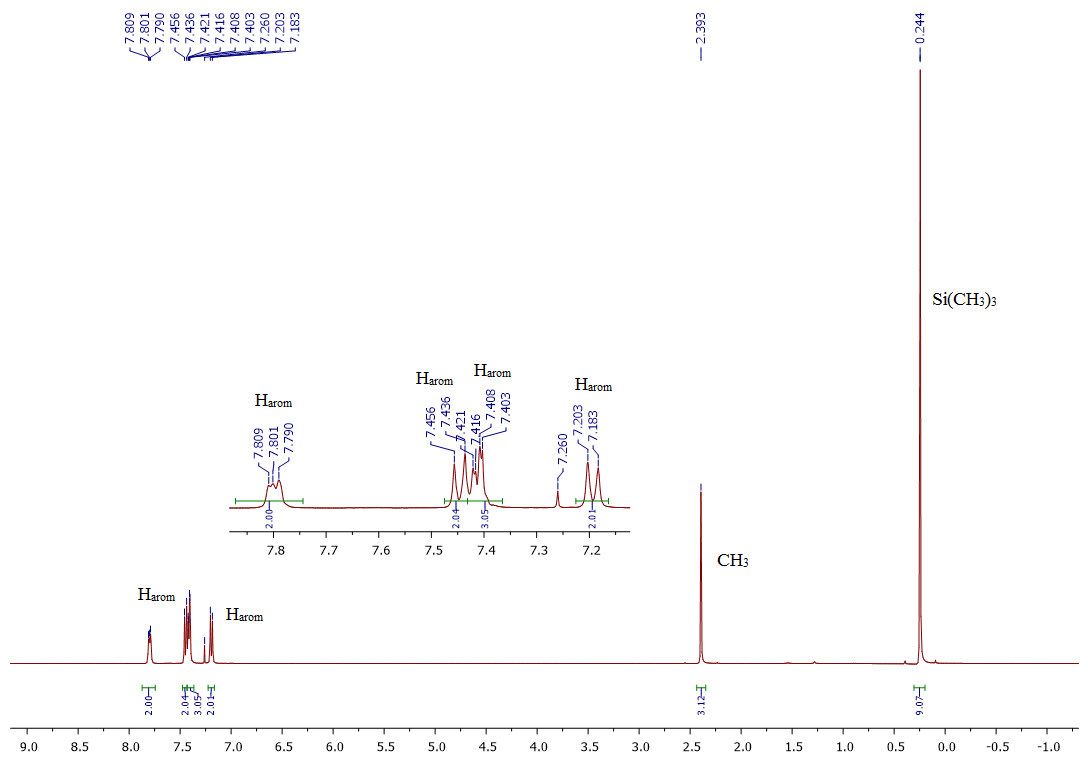


Figure S26. 1Н-NMR spectrum of the compound **Ii** (CDCl3, 400 MHz).


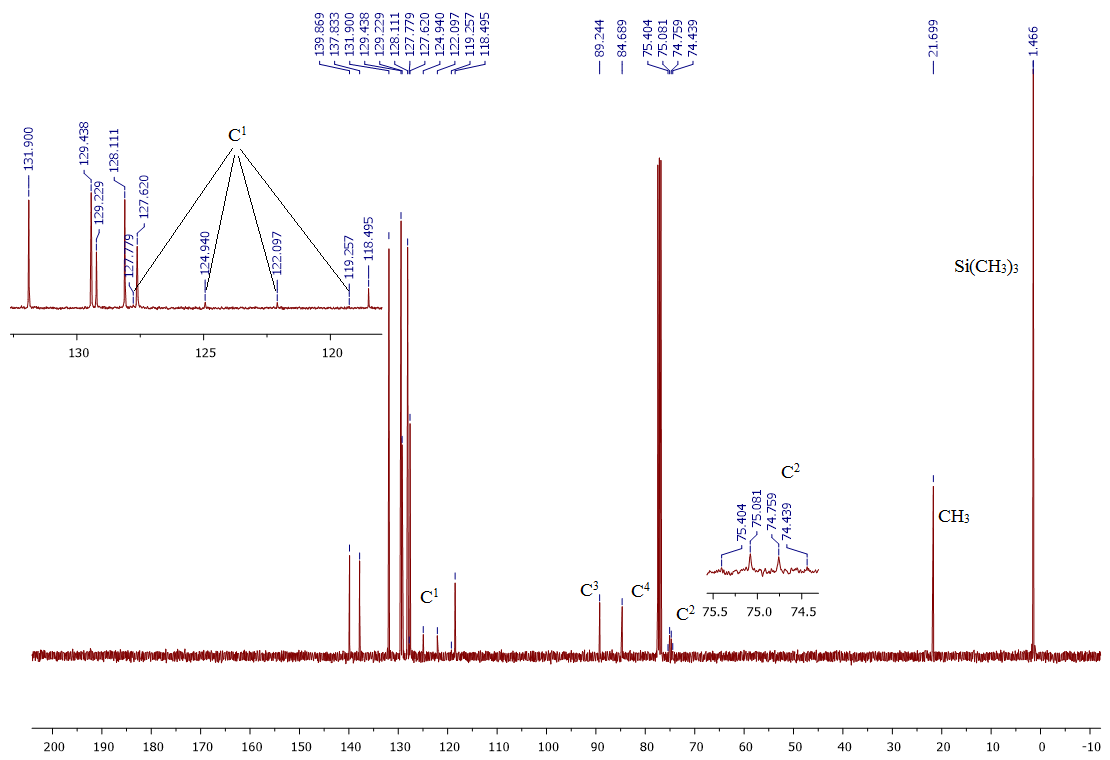


Figure S27. 13C-NMR spectrum of the compound **Ii** (CDCl3, 100 MHz).


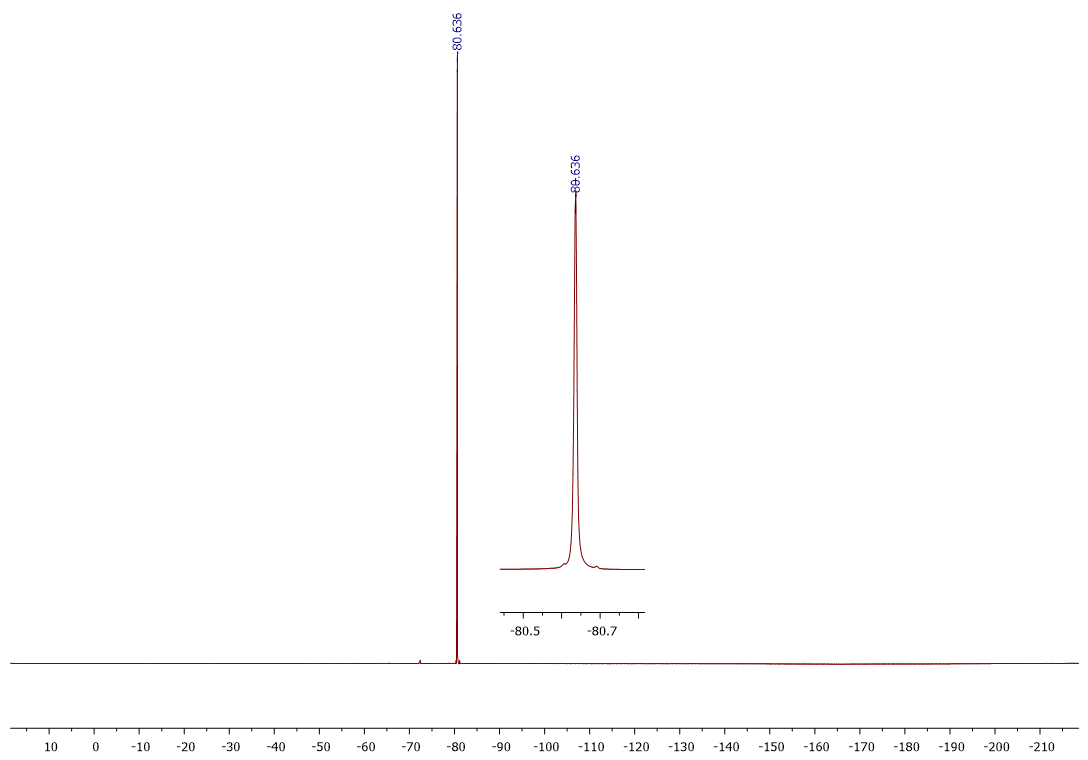


Figure S28. 19F-NMR spectrum of the compound **Ii** (CDCl3, 376 MHz).


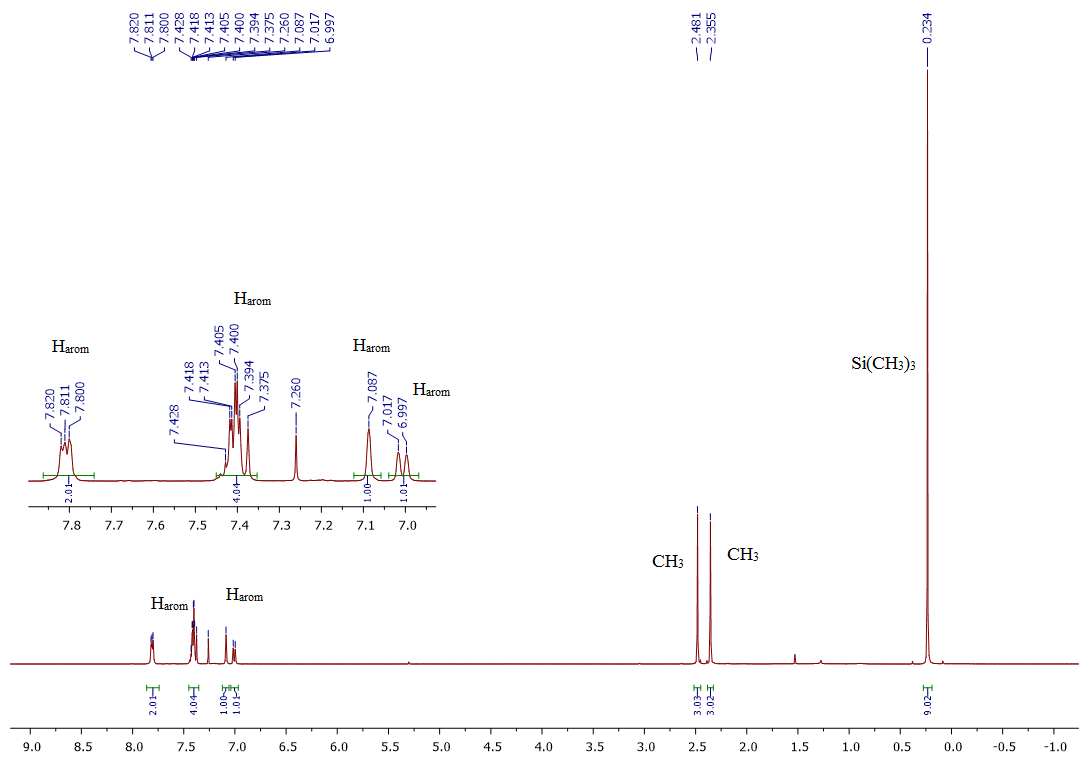


Figure S29. 1Н-NMR spectrum of the compound **Ij** (CDCl3, 400 MHz).


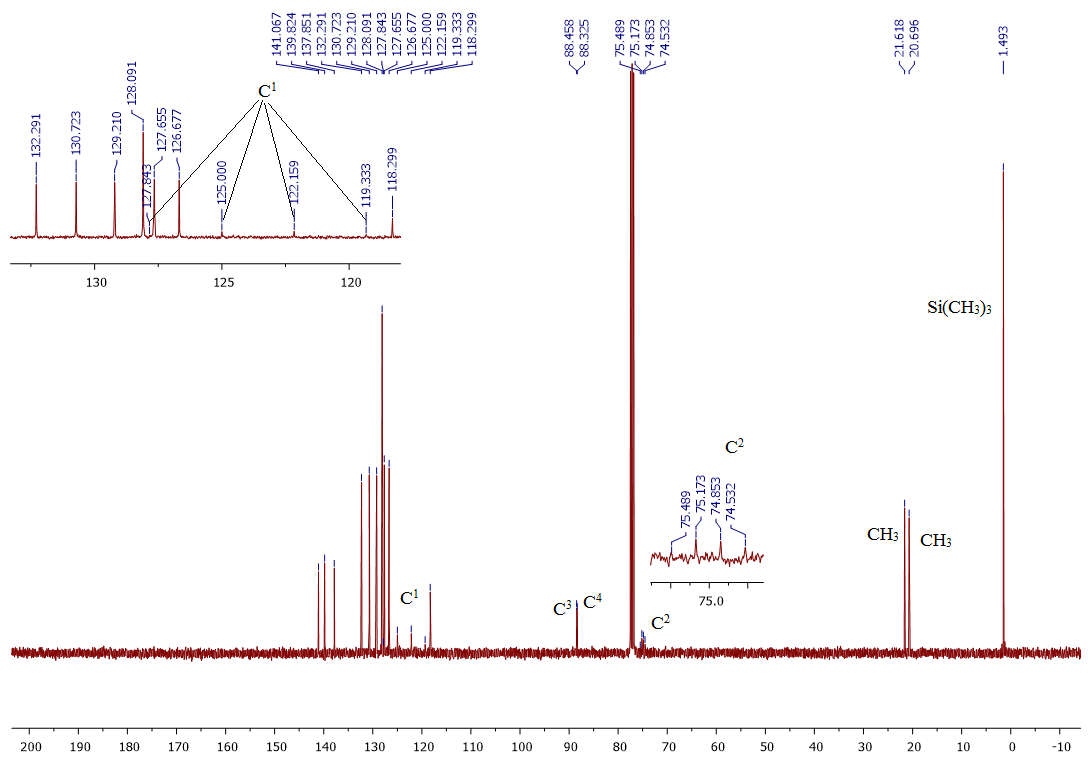


Figure S30. 13C-NMR spectrum of the compound **Ij** (CDCl3, 100 MHz).


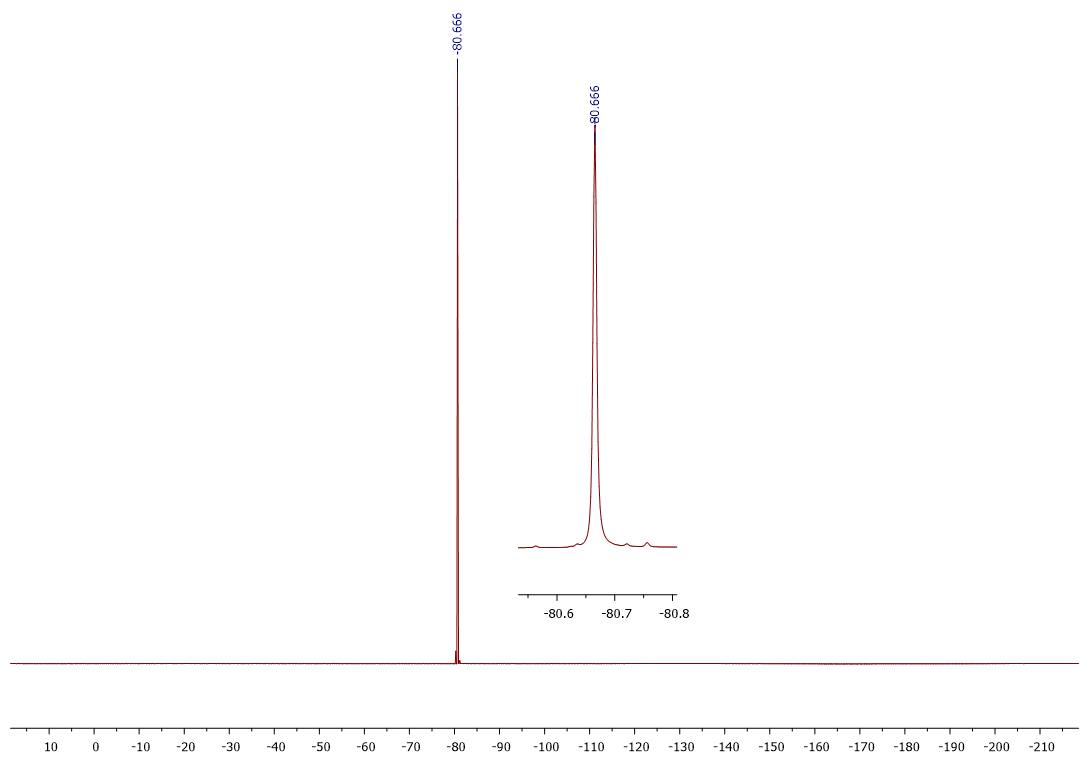


Figure S31. 19F-NMR spectrum of the compound **Ij** (CDCl3, 376 MHz).


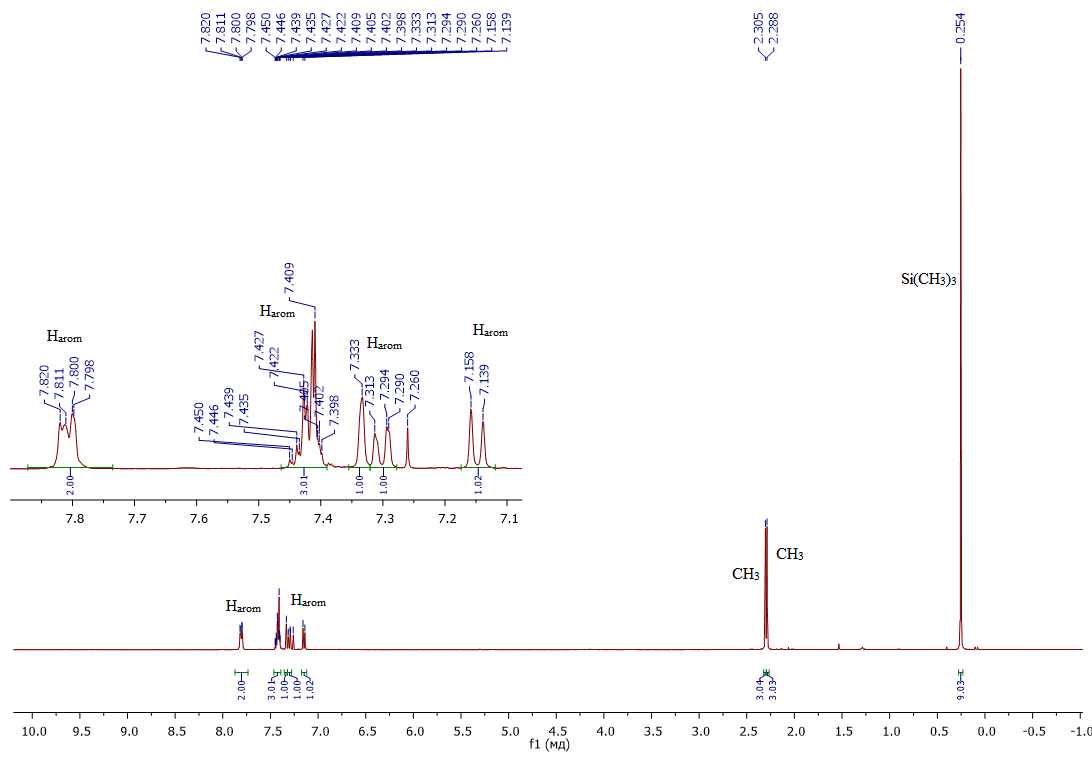


Figure S32. 1Н-NMR spectrum of the compound **Ik** (CDCl3, 400 MHz).


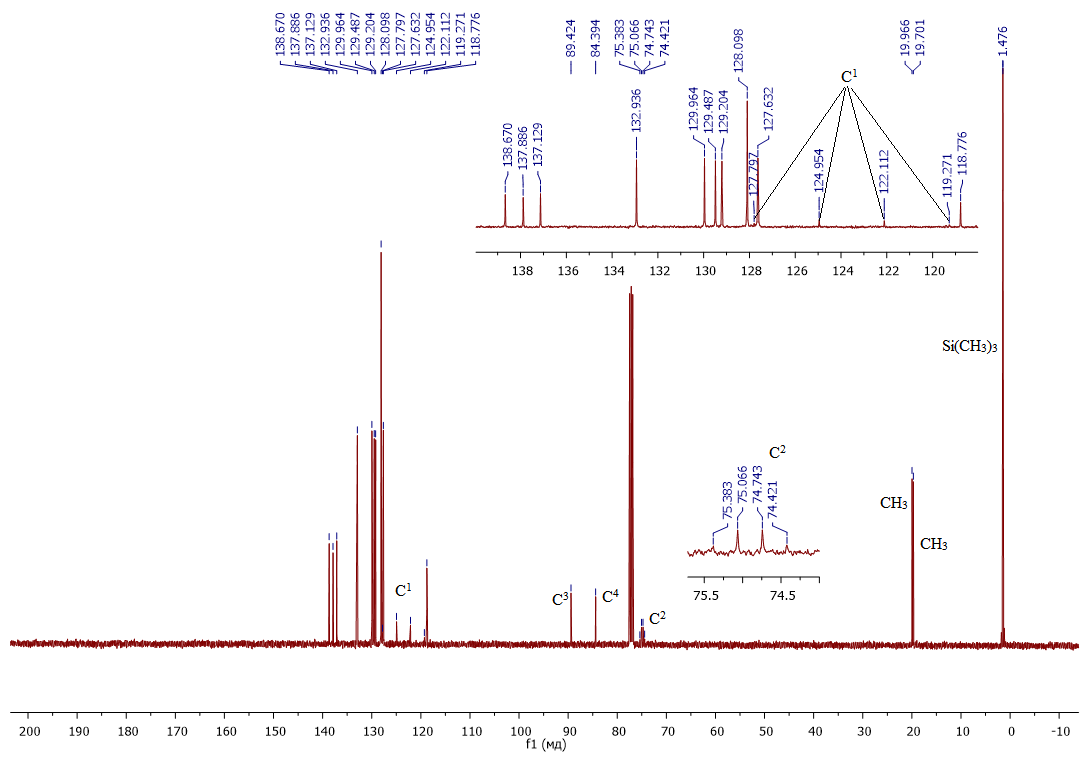


Figure S33. 13C-NMR spectrum of the compound **Ik** (CDCl3, 100 MHz).


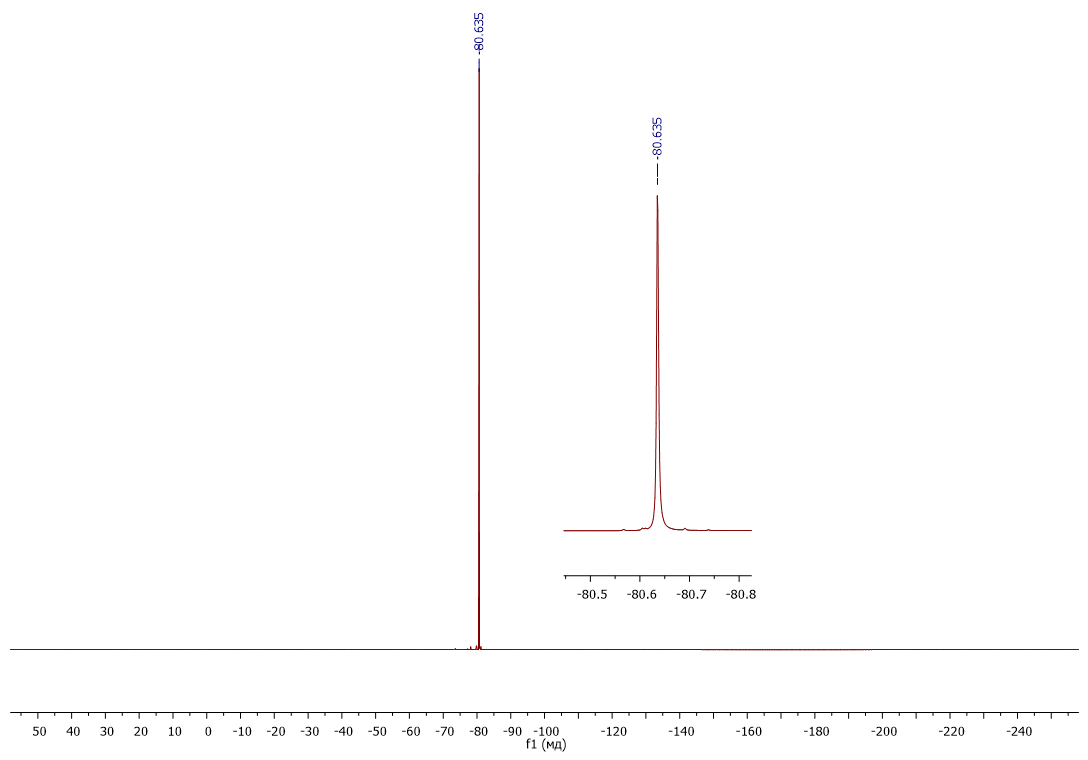


Figure S34. 19F-NMR spectrum of the compound **Ik** (CDCl3, 376 MHz).


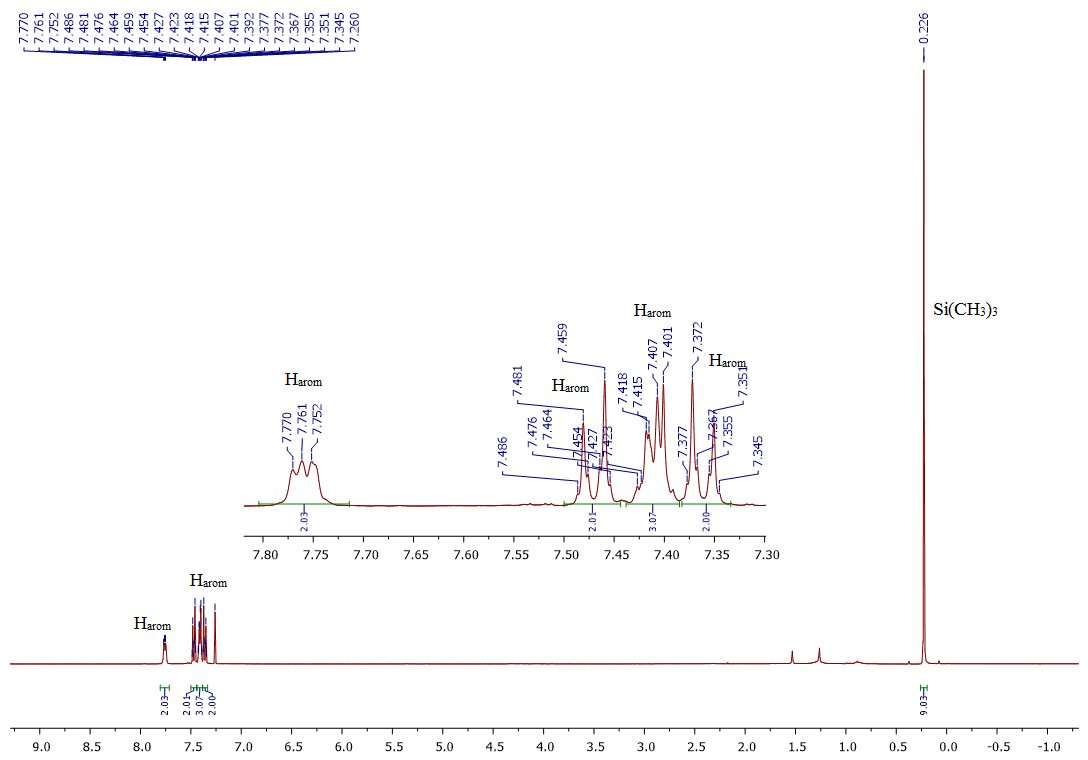


Figure S35. 1Н-NMR spectrum of the compound **Il** (CDCl3, 400 MHz).


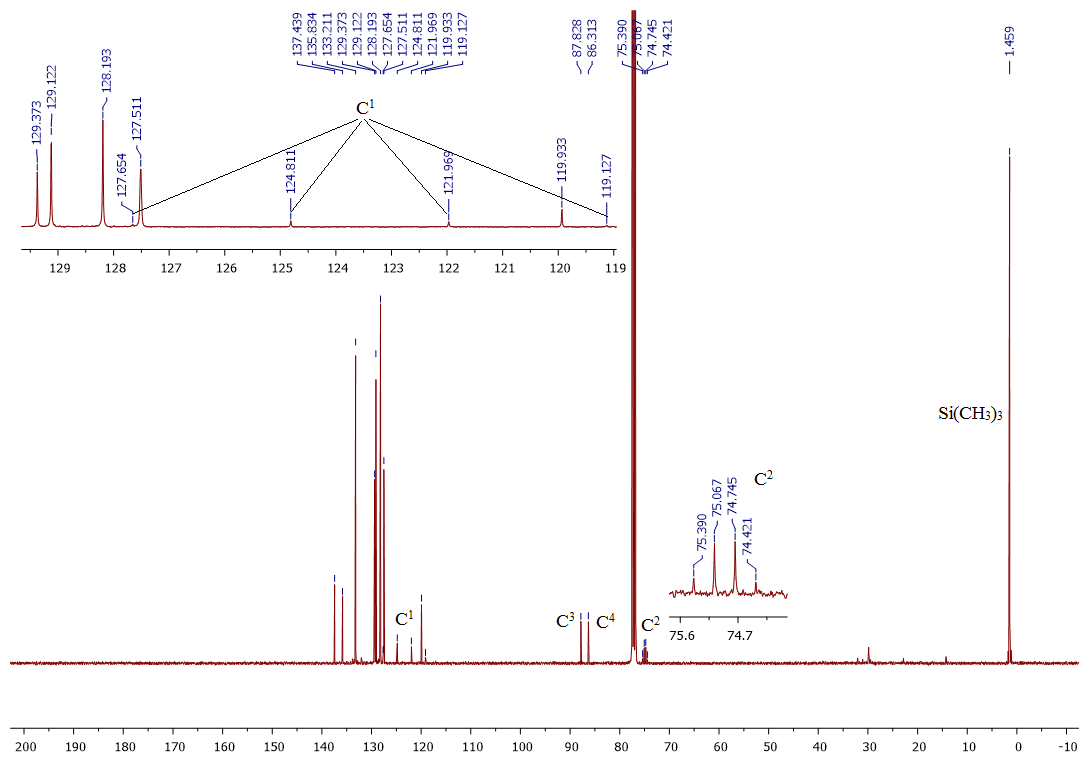


Figure S36. 13C-NMR spectrum of the compound **Il** (CDCl3, 100 MHz).


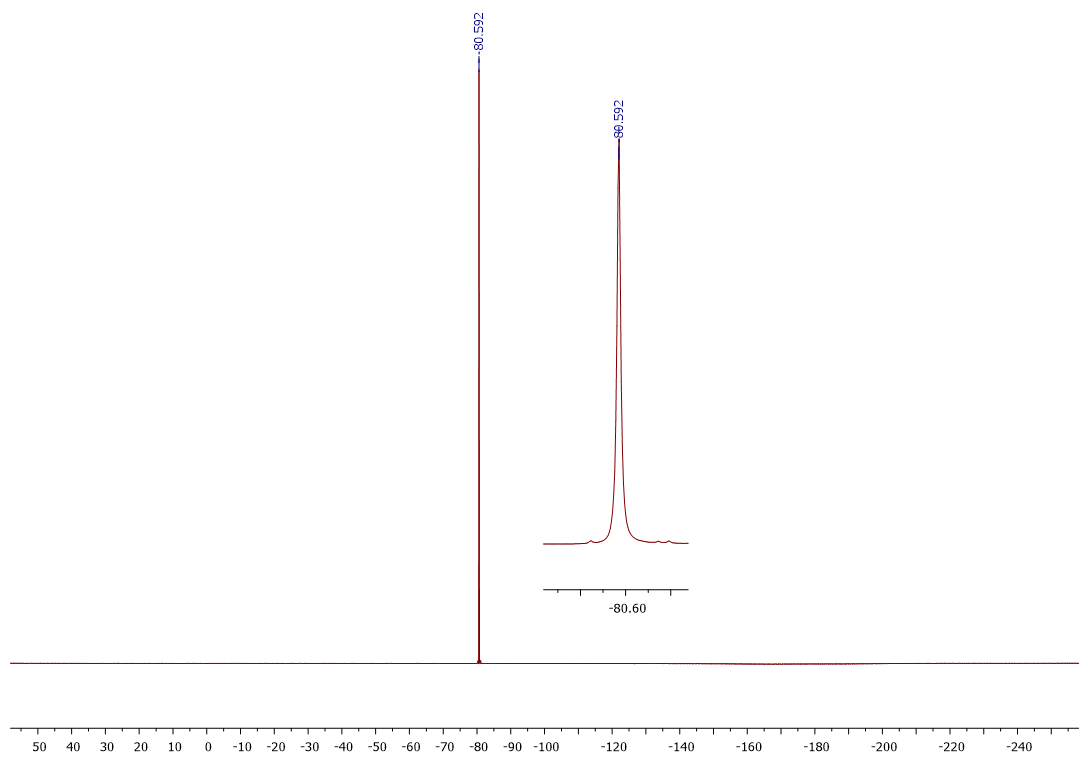


Figure S37. 19F-NMR spectrum of the compound **Il** (CDCl3, 376 MHz).


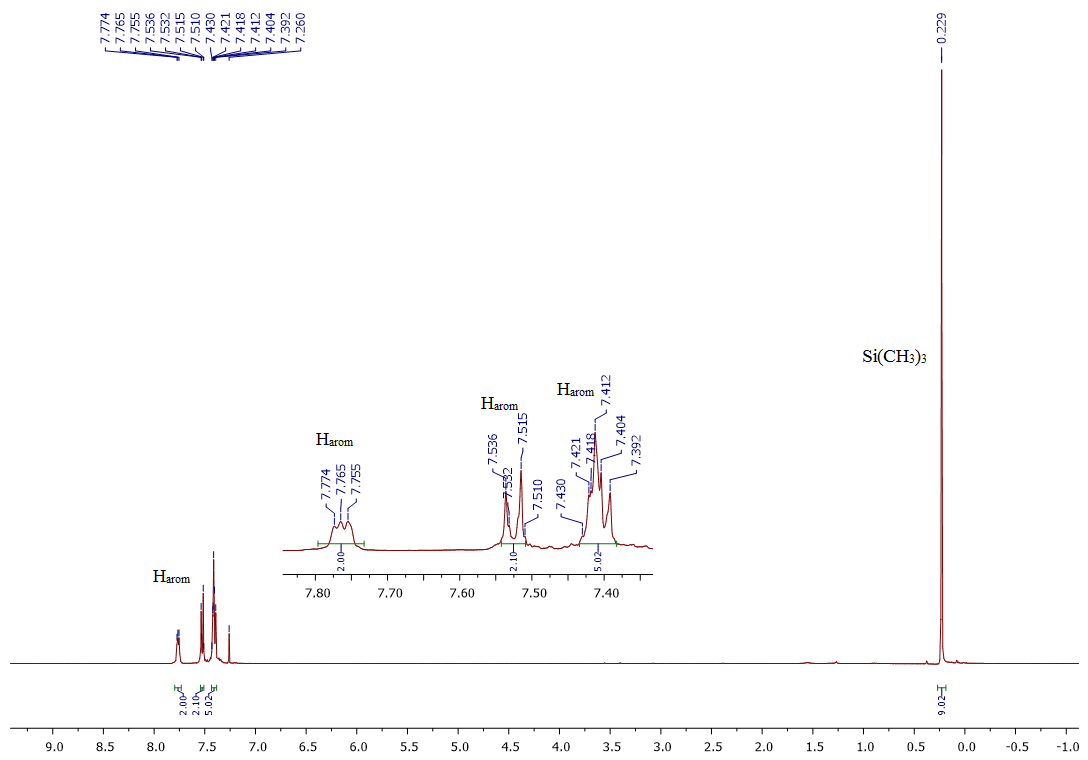


Figure S38. 1Н-NMR spectrum of the compound **Im** (CDCl3, 400 MHz).


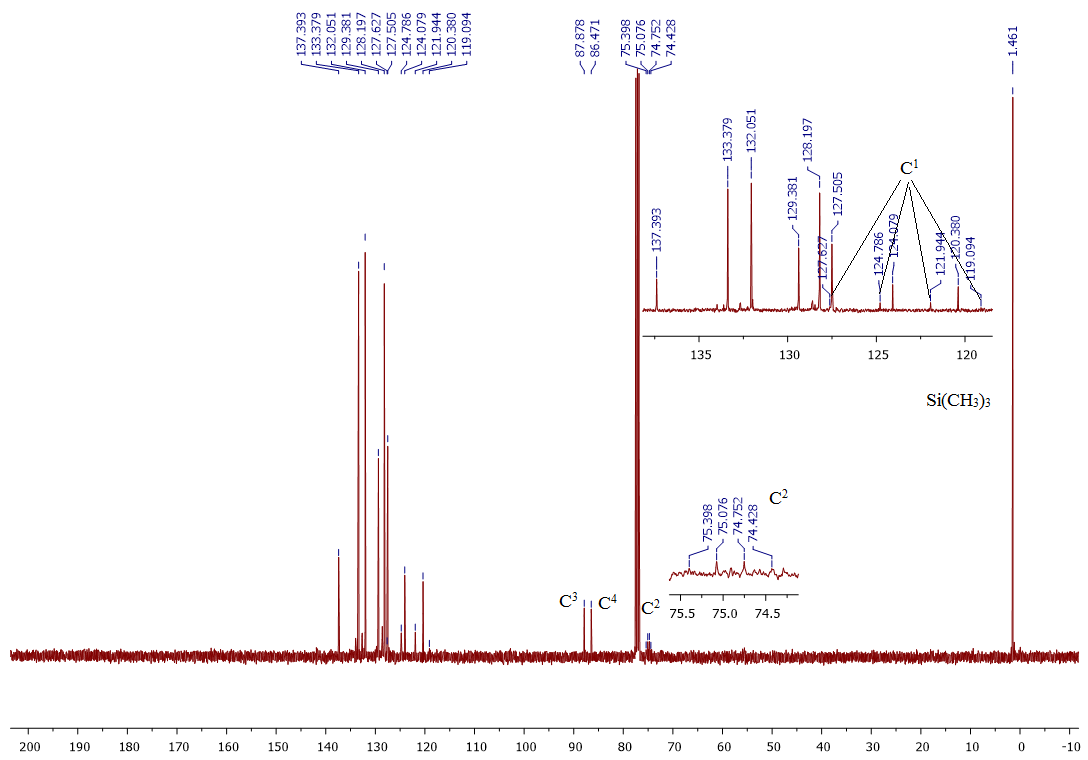


Figure S39. 13C-NMR spectrum of the compound **Im** (CDCl3, 100 MHz).


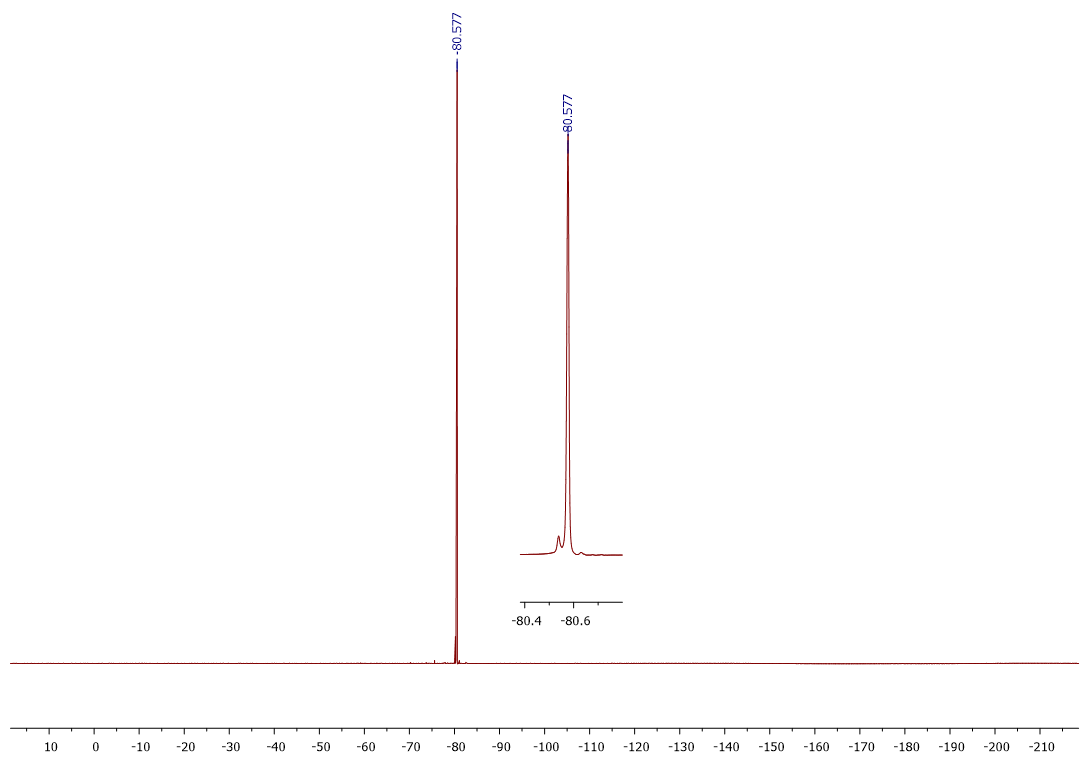


Figure S40. 19F-NMR spectrum of the compound **Im** (CDCl3, 376 MHz).


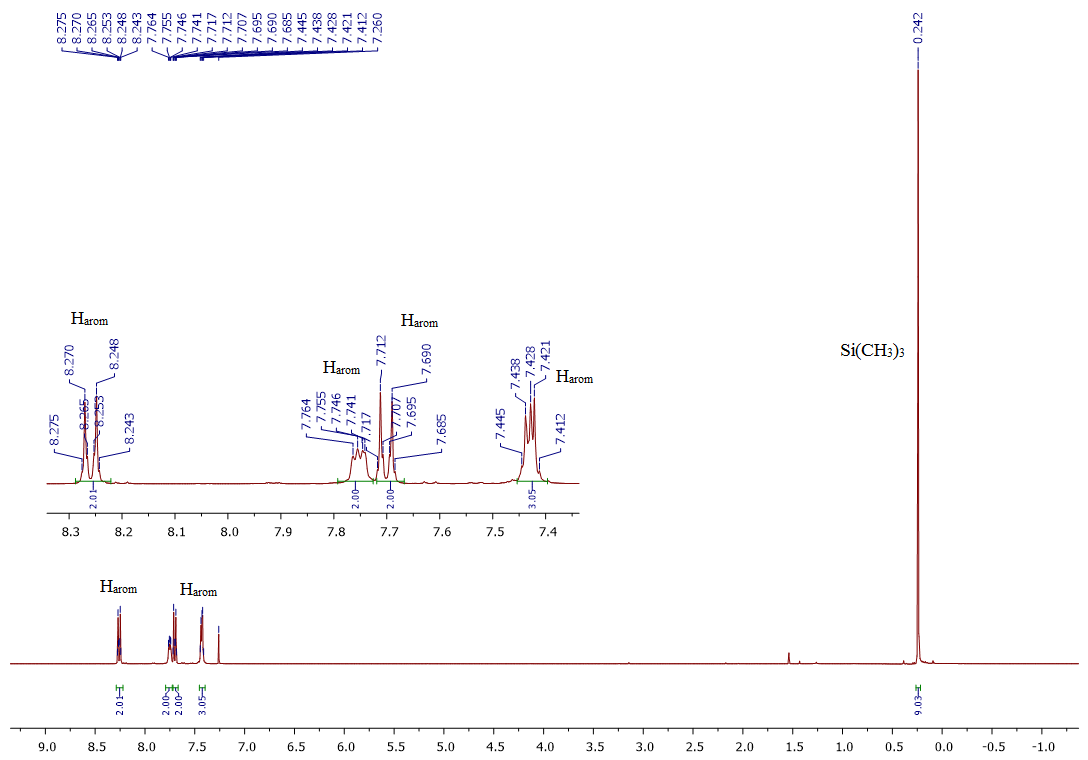


Figure S41. 1Н-NMR spectrum of the compound **In** (CDCl3, 400 MHz).


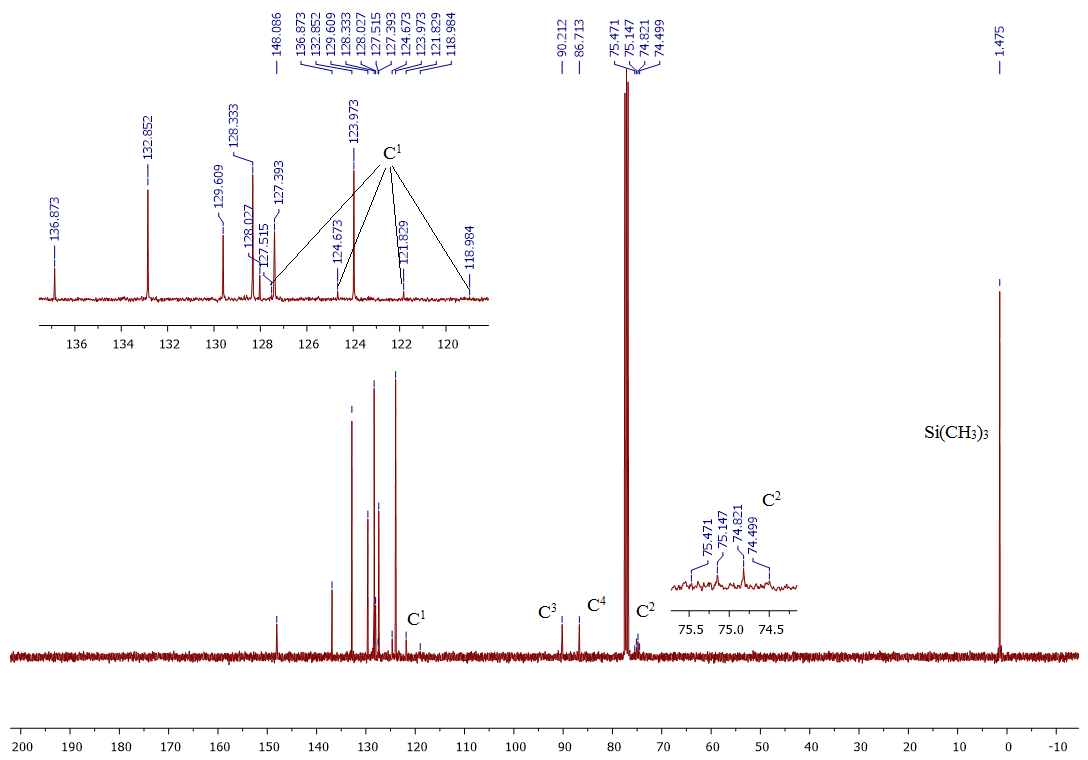


Figure S42. 13C-NMR spectrum of the compound **In** (CDCl3, 100 MHz).


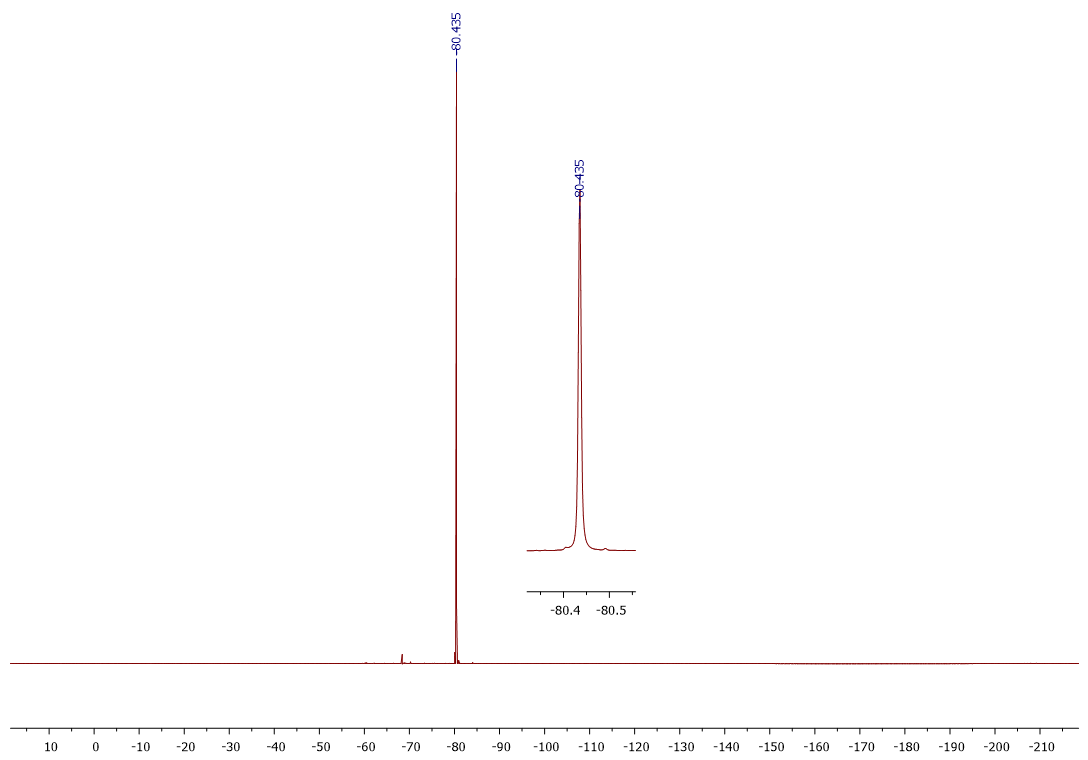


Figure S43. 19F-NMR spectrum of the compound **In** (CDCl3, 376 MHz).


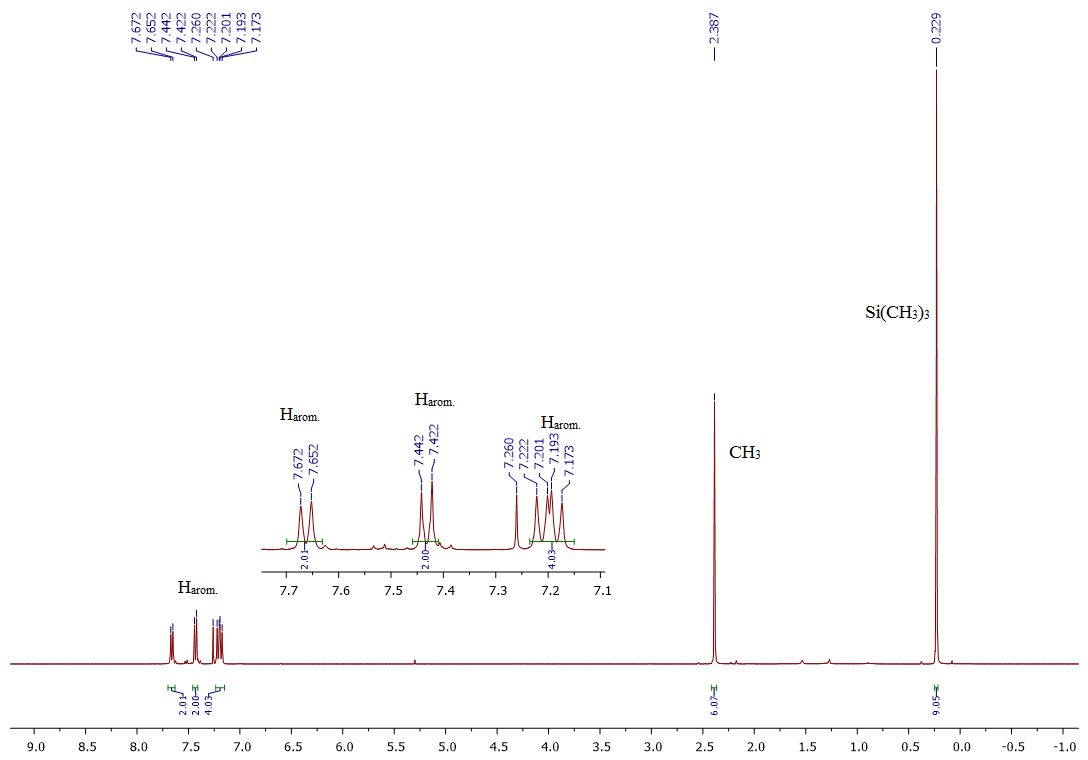


Figure S44. 1Н-NMR spectrum of the compound **Io** (CDCl3, 400 MHz).


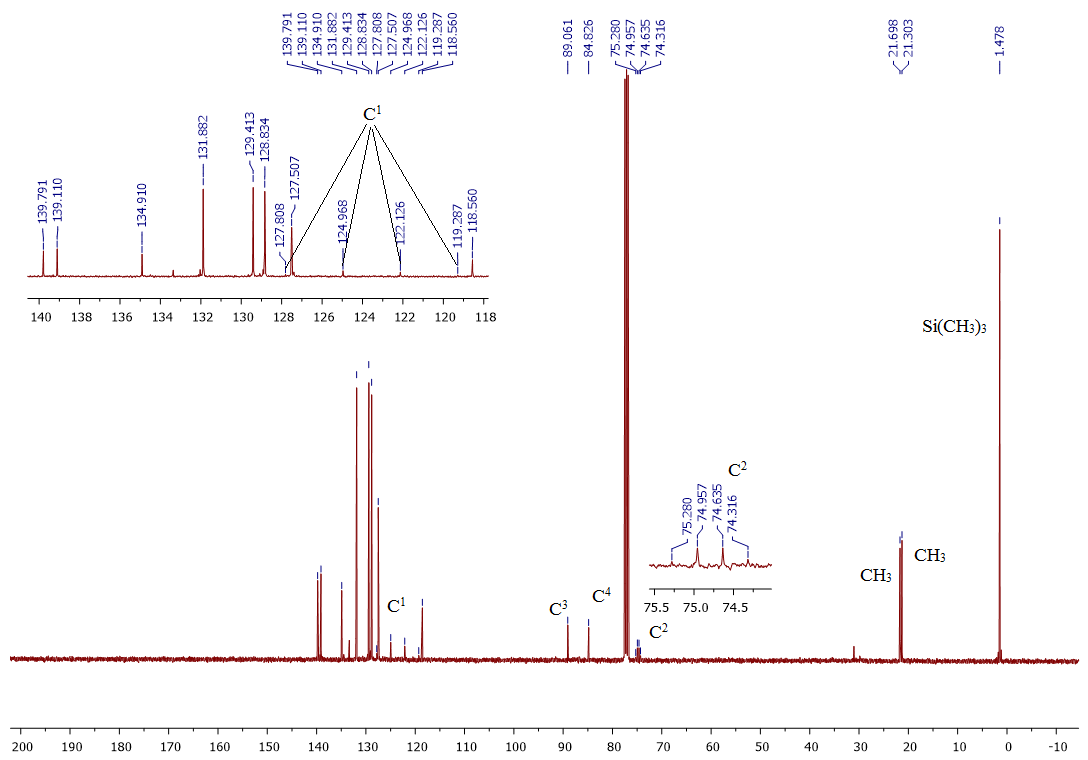


Figure S45. 13C-NMR spectrum of the compound **Io** (CDCl3, 100 MHz).


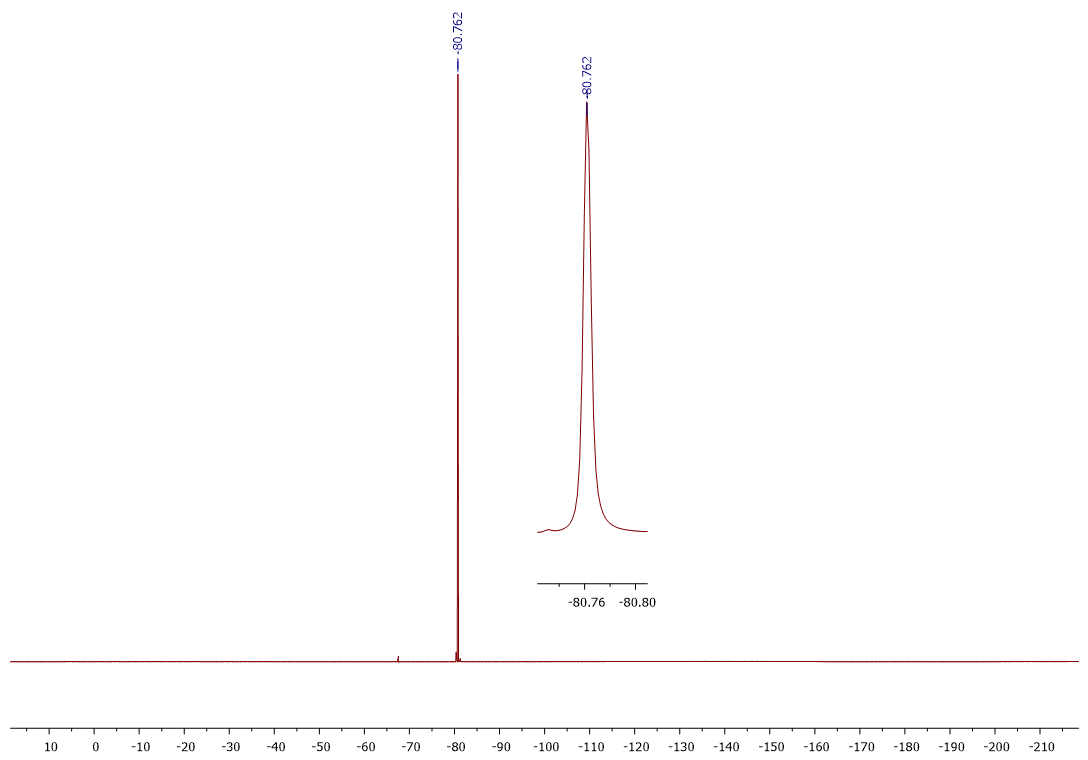


Figure S46. 19F-NMR spectrum of the compound **Io** (CDCl3, 376 MHz).


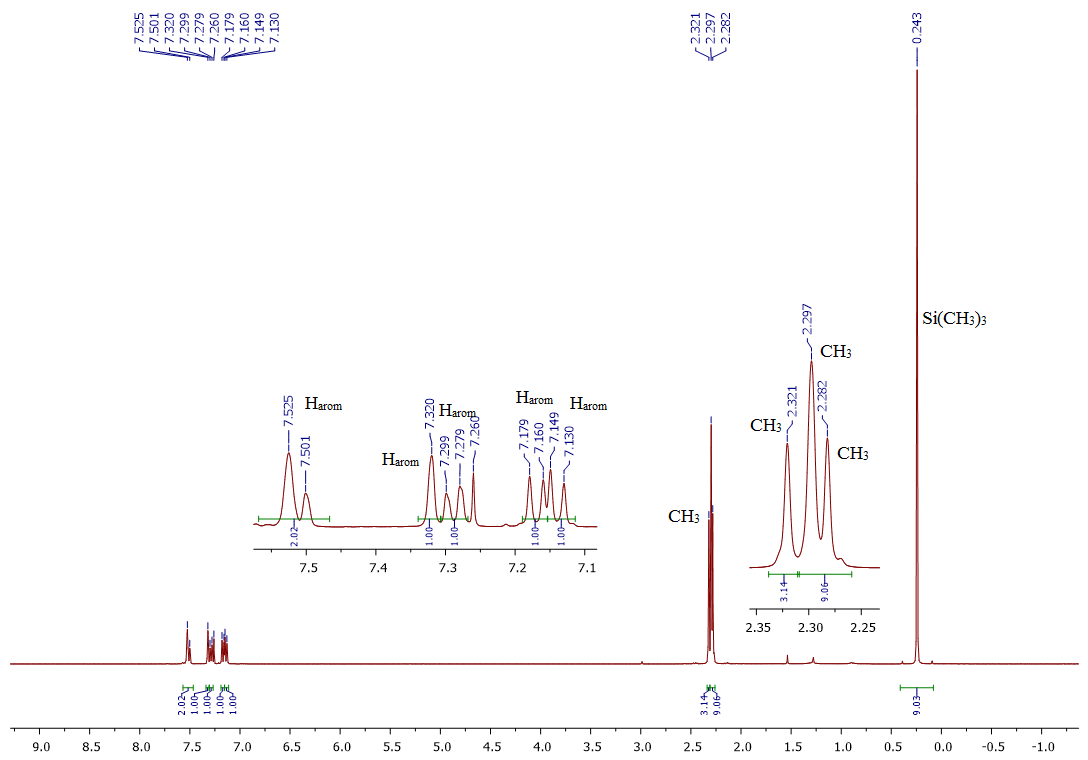


Figure S47. 1Н-NMR spectrum of the compound **Ip** (CDCl3, 400 MHz).


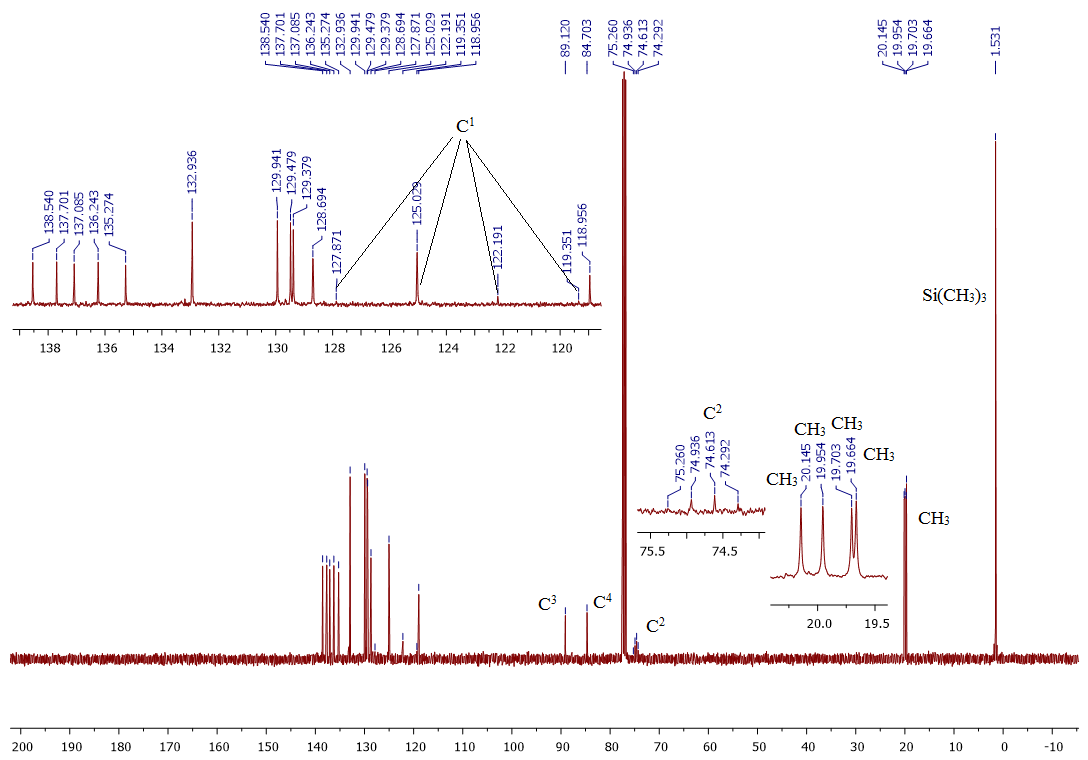


Figure S48. 13C-NMR spectrum of the compound **Ip** (CDCl3, 100 MHz).


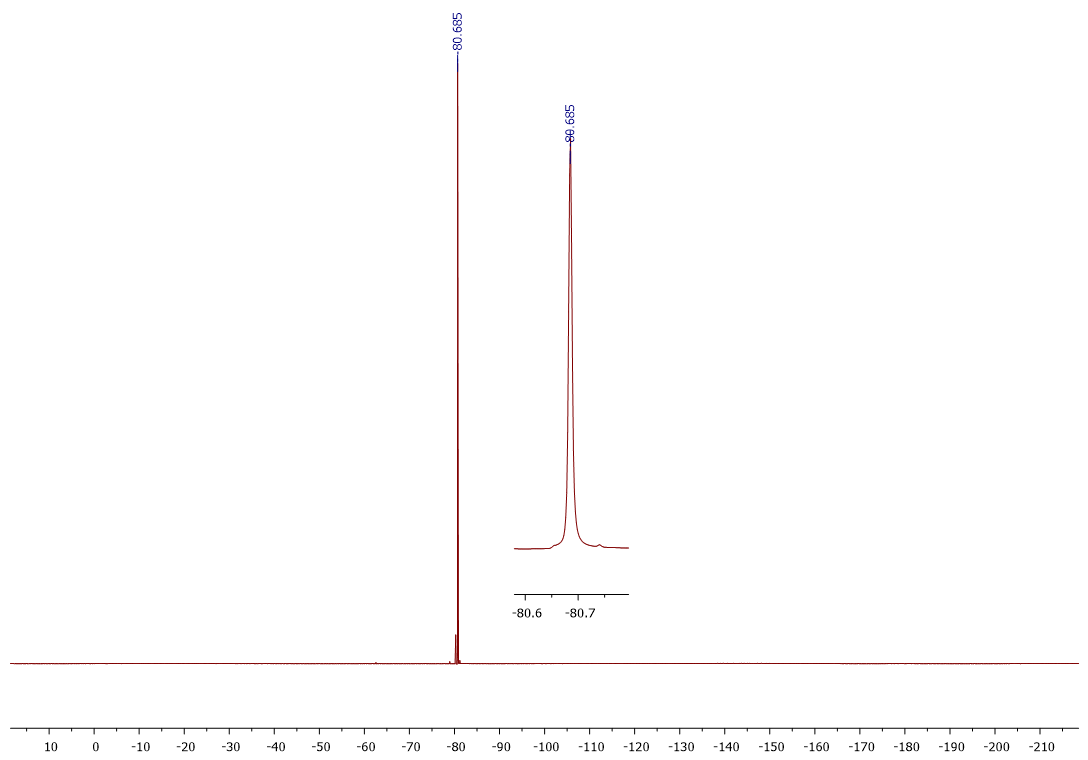


Figure S49. 19F-NMR spectrum of the compound **Ip** (CDCl3, 376 MHz).


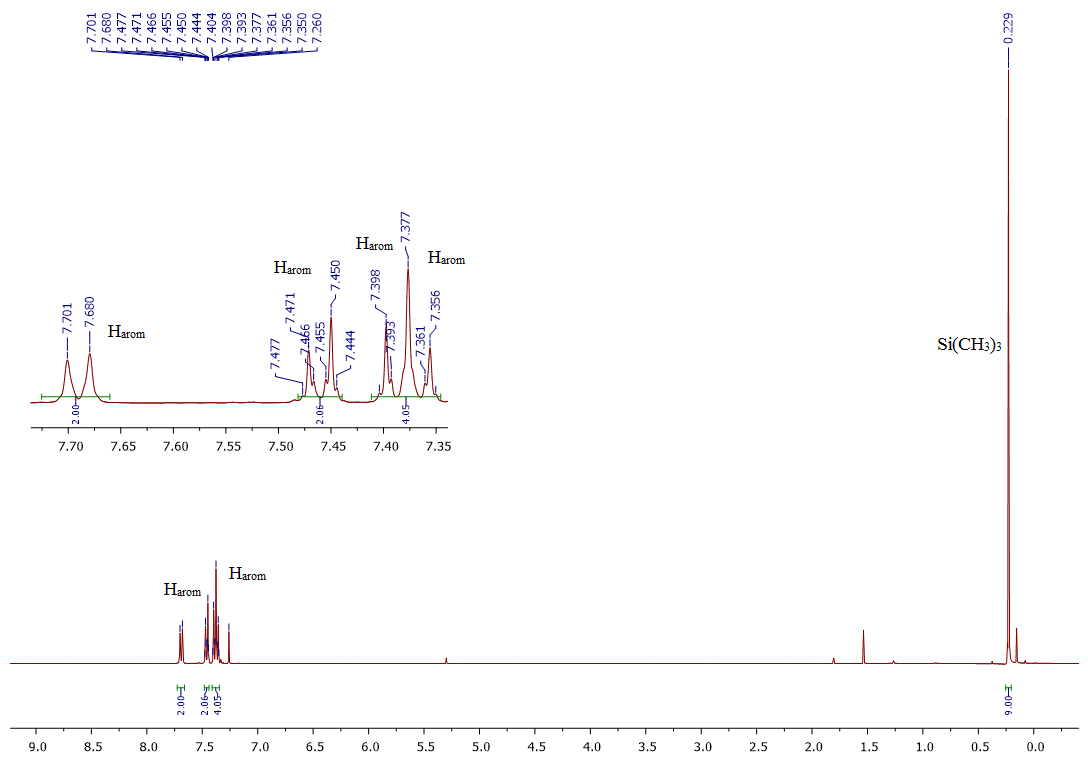


Figure S50. 1Н-NMR spectrum of the compound **Iq** (CDCl3, 400 MHz).


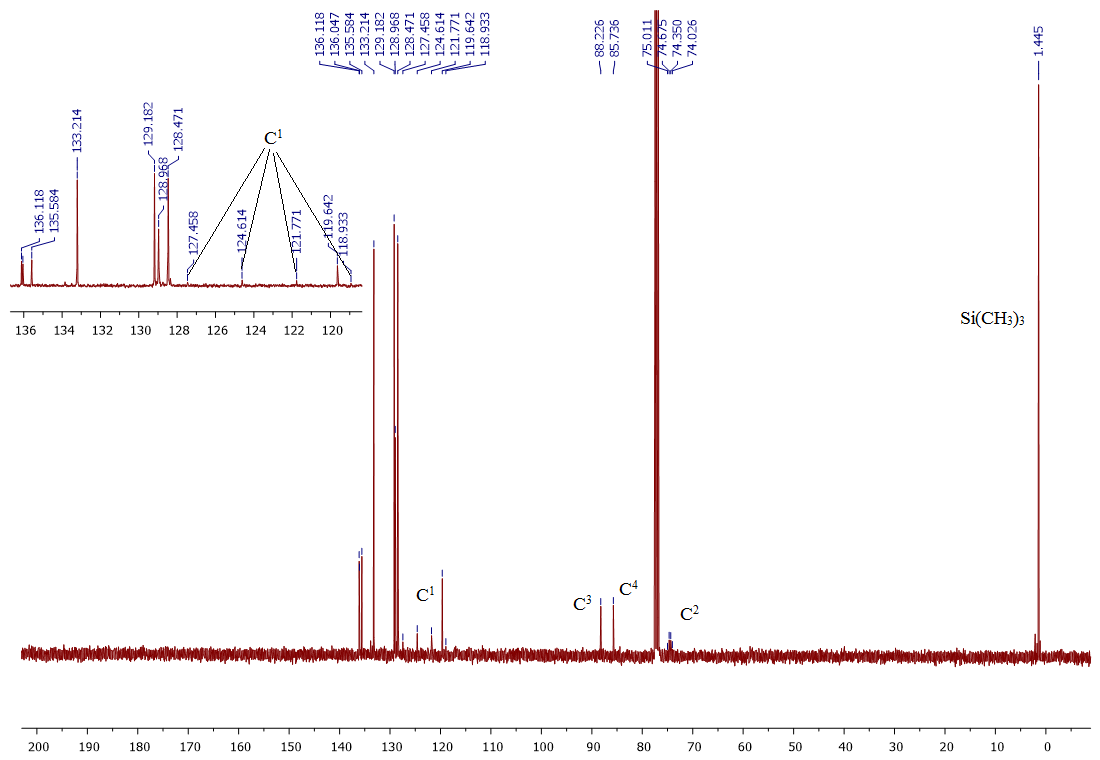


Figure S51. 13C-NMR spectrum of the compound **Iq** (CDCl3, 100 MHz).


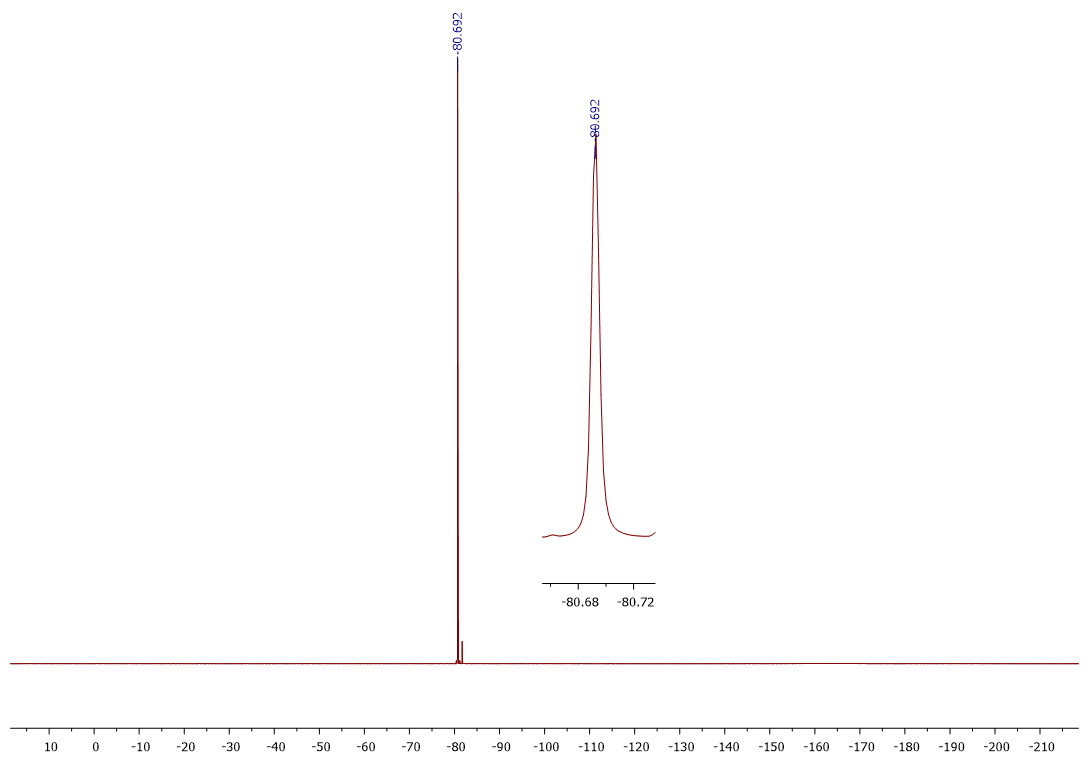


Figure S52. 19F-NMR spectrum of the compound **Iq** (CDCl3, 376 MHz).


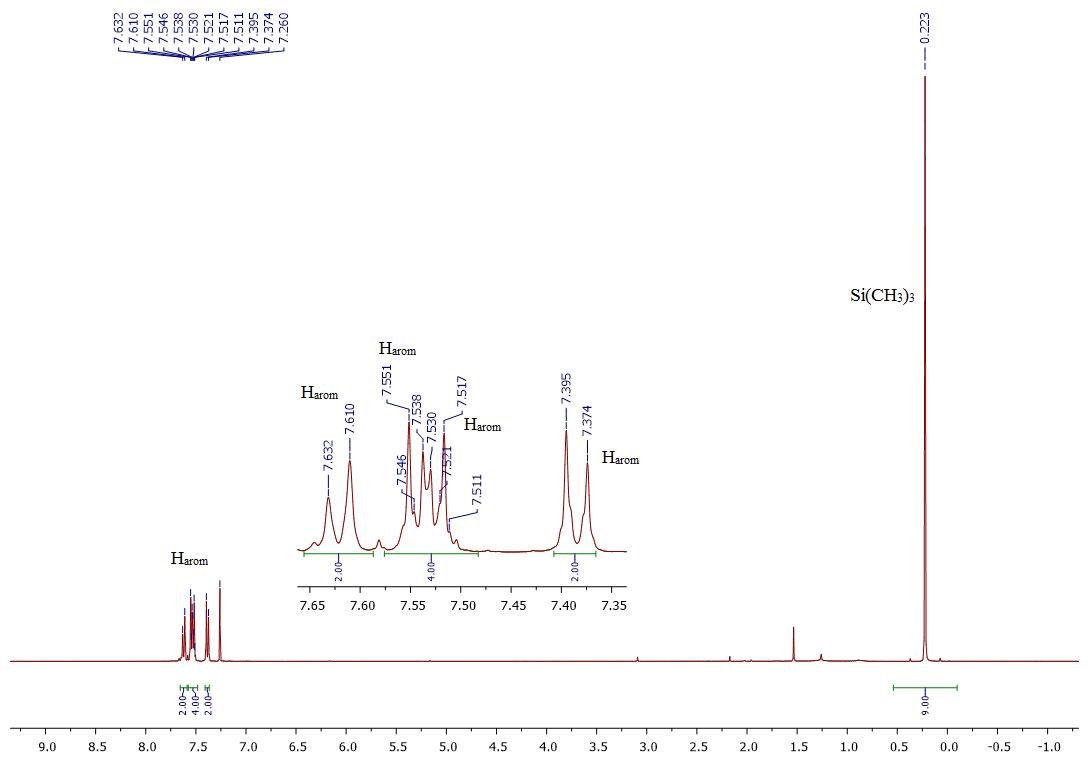


Figure S53. 1Н-NMR spectrum of the compound **Ir** (CDCl3, 400 MHz).


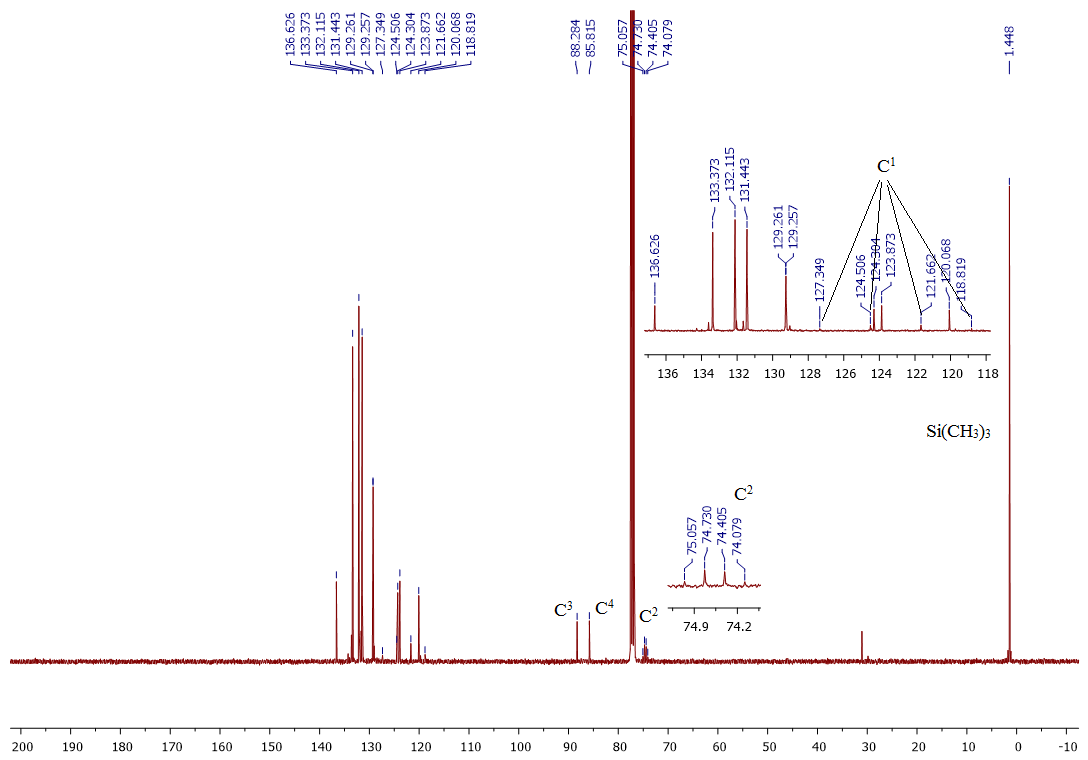


Figure S54. 13C-NMR spectrum of the compound **Ir** (CDCl3, 100 MHz).


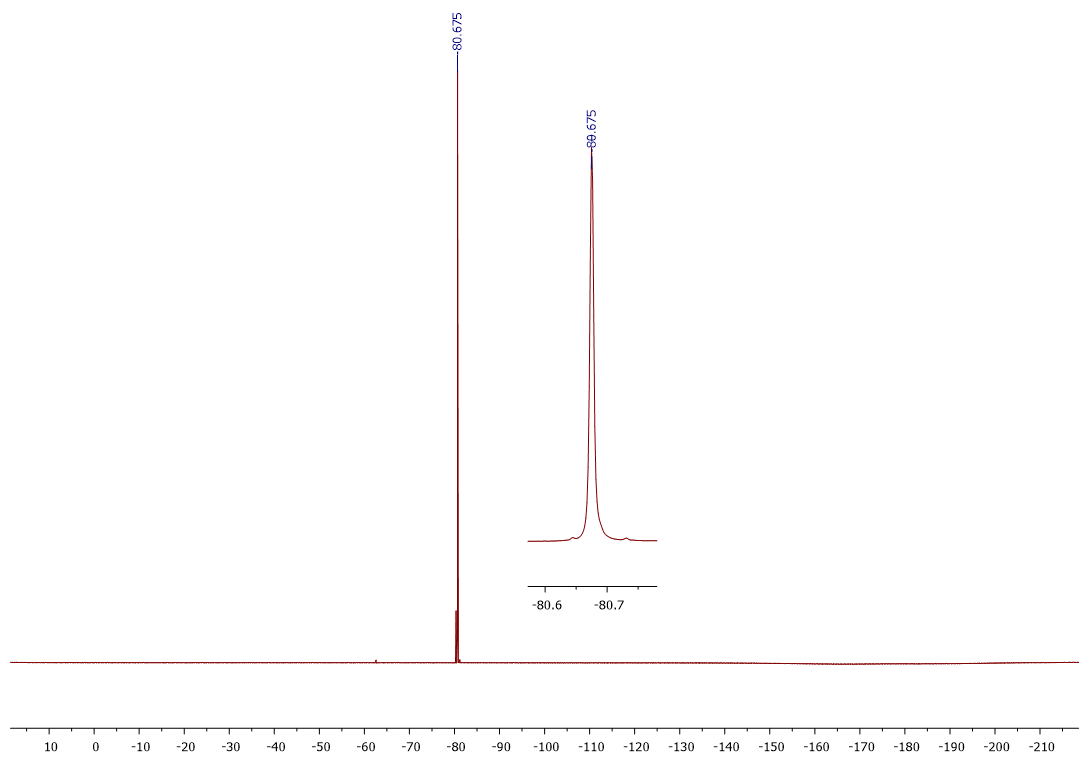


Figure S55. 19F-NMR spectrum of the compound **Ir** (CDCl3, 376 MHz).


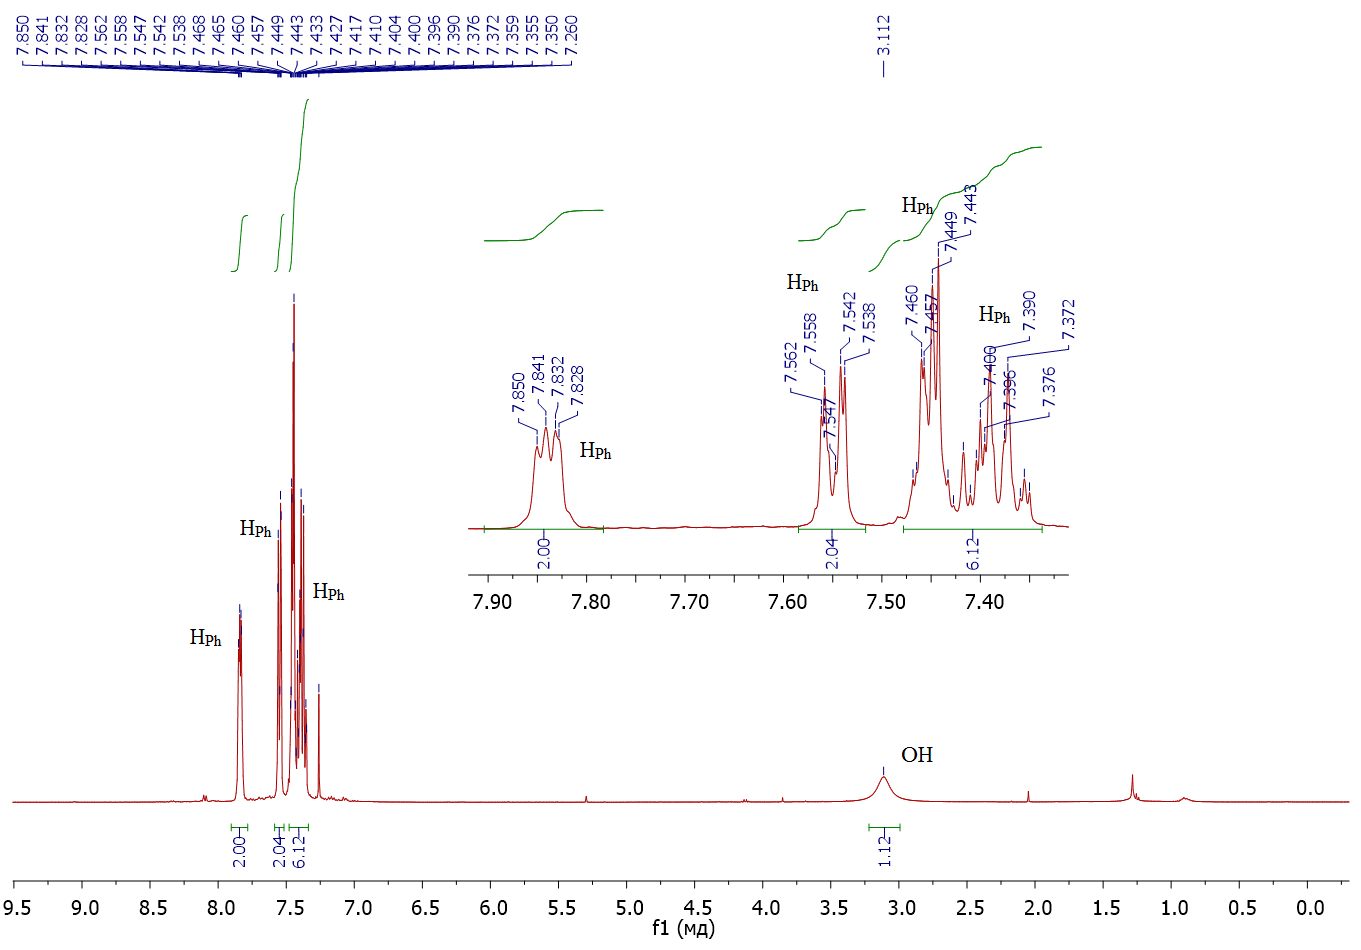


Figure S56. 1Н-NMR spectrum of the compound **1a** (CDCl3, 400 MHz).


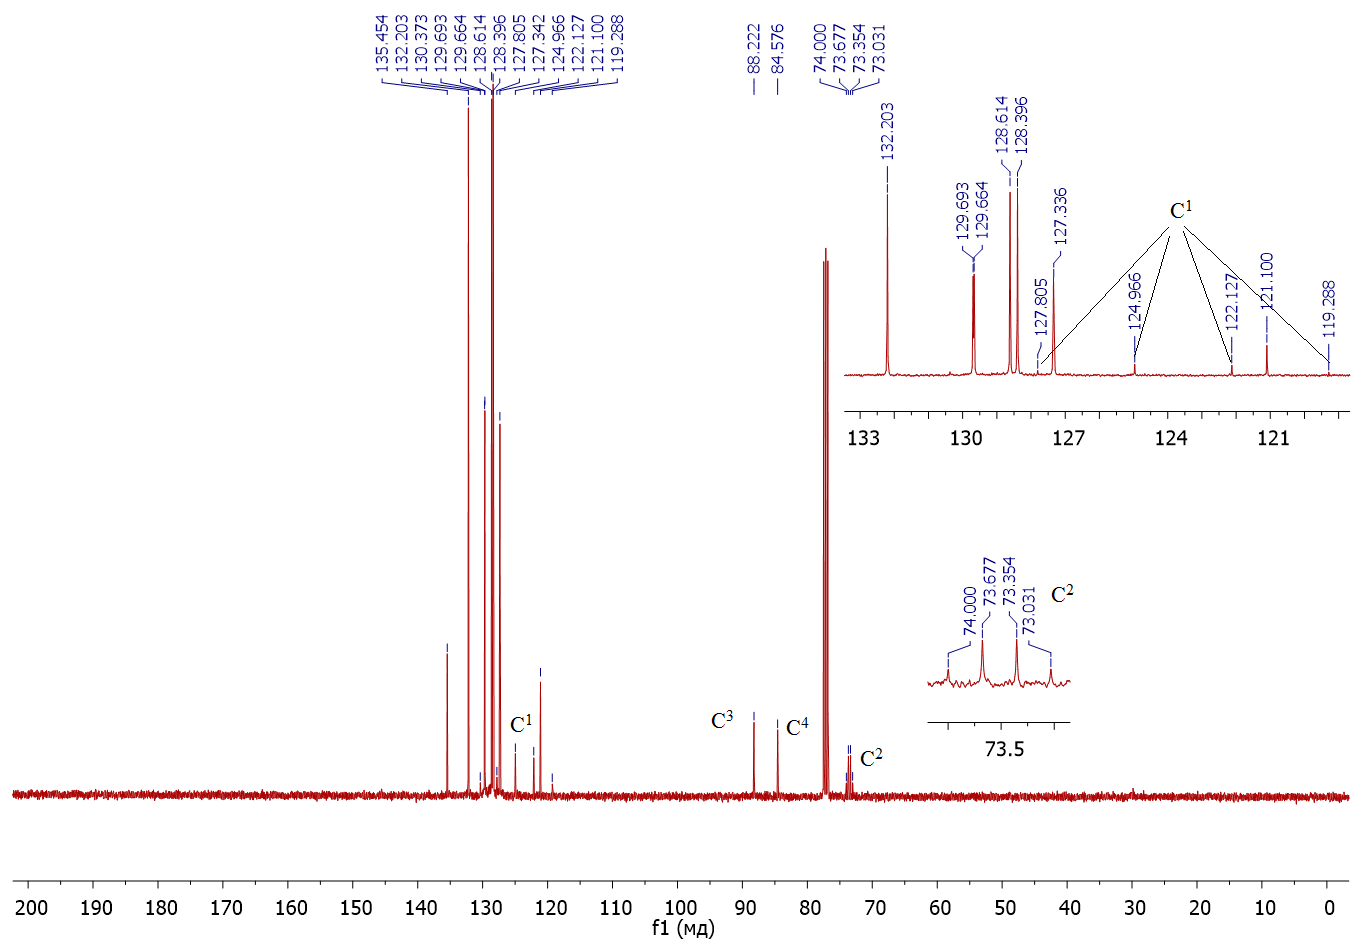


Figure S57. 13C-NMR spectrum of the compound **1a** (CDCl3, 100 MHz).


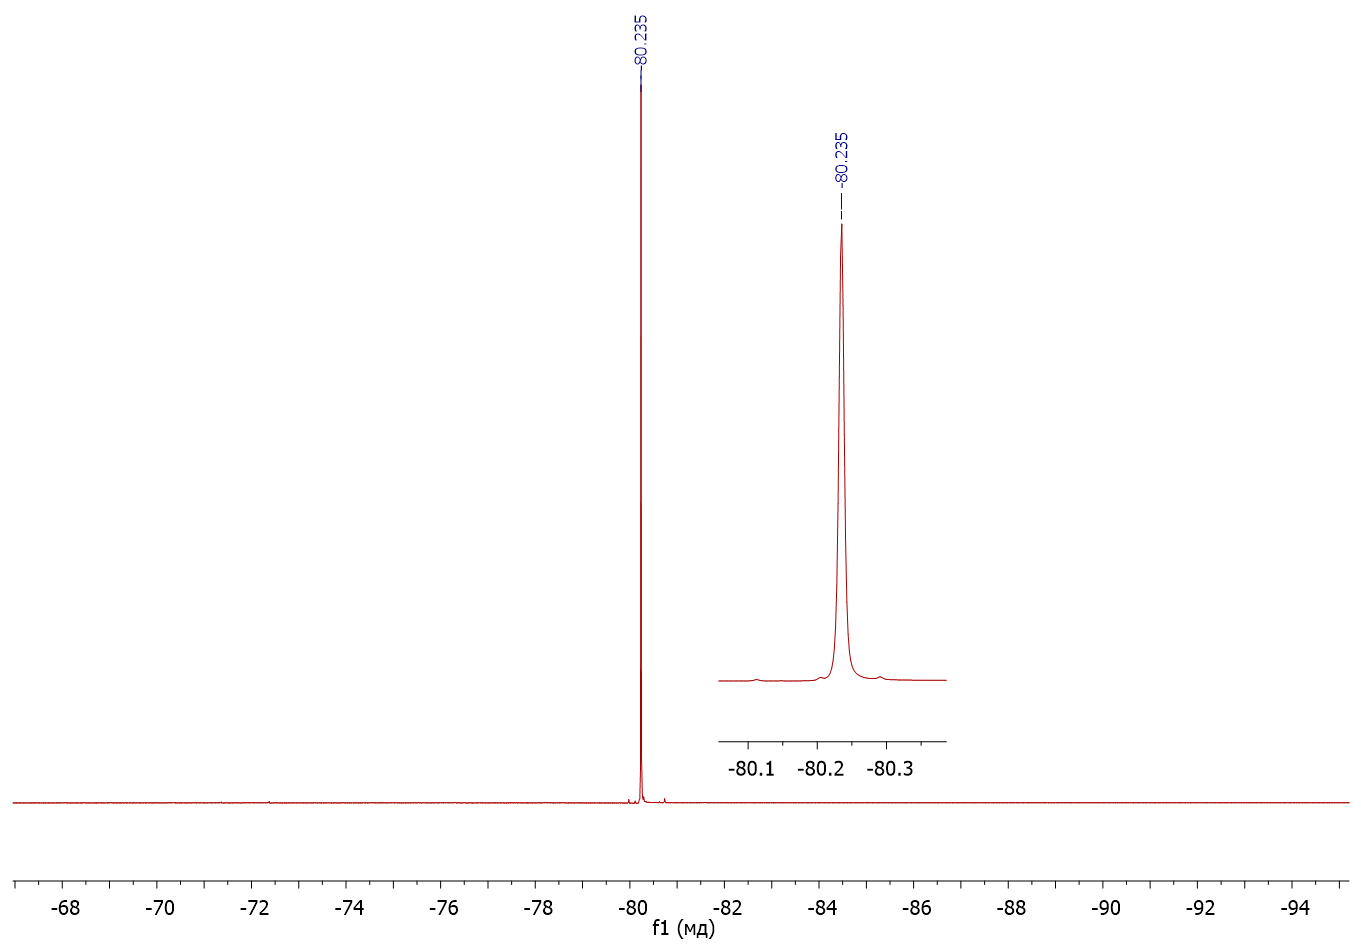


Figure S58. 19F-NMR spectrum of the compound **1a** (CDCl3, 376 MHz).


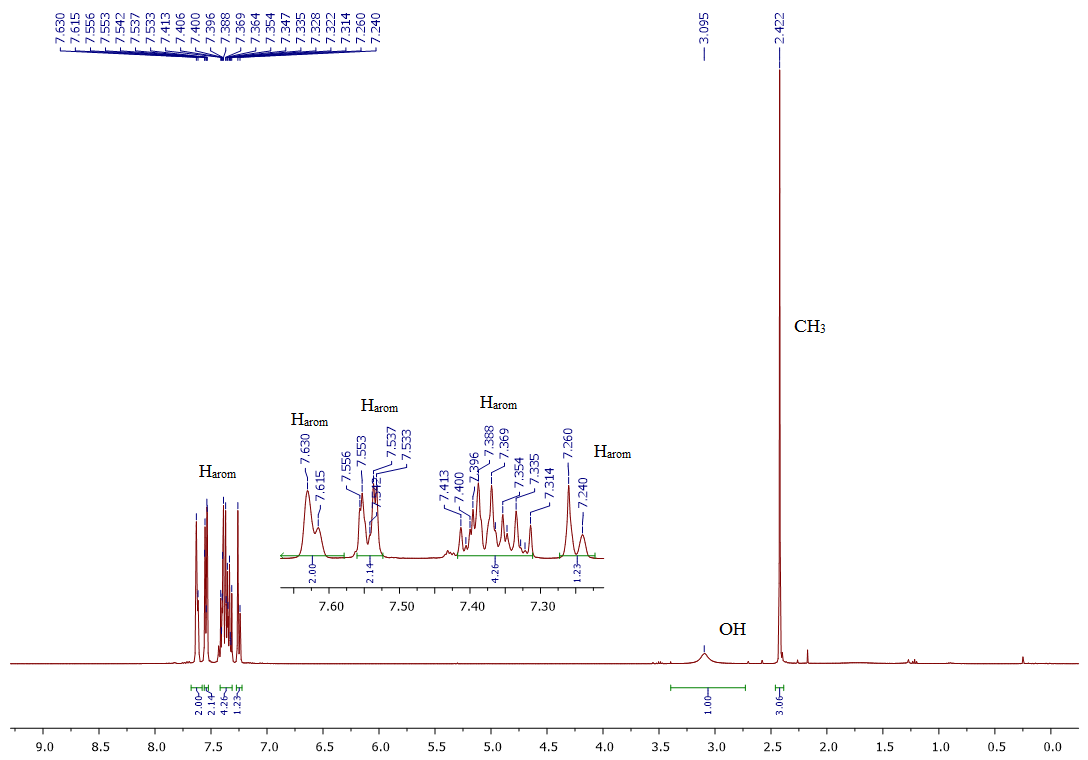


Figure S59. 1Н-NMR spectrum of the compound **1b** (CDCl3, 400 MHz).


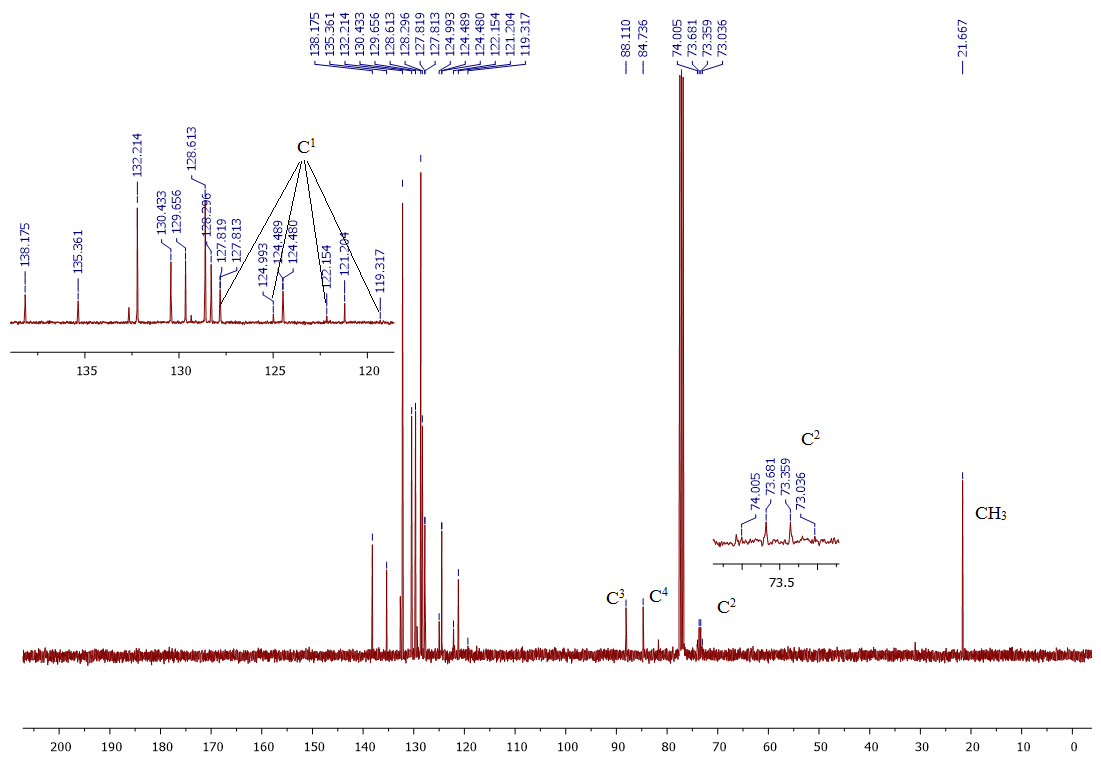


Figure S60. 13C-NMR spectrum of the compound **1b** (CDCl3, 100 MHz).


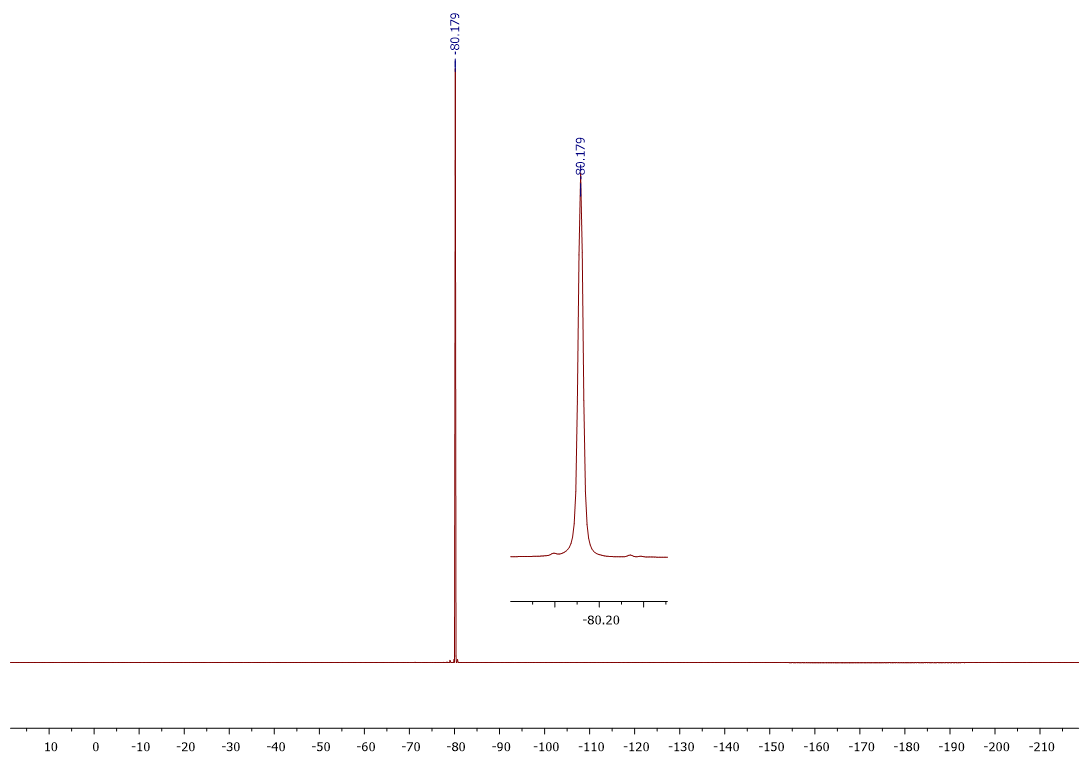


Figure S61. 19F-NMR spectrum of the compound **1b** (CDCl3, 376 MHz).


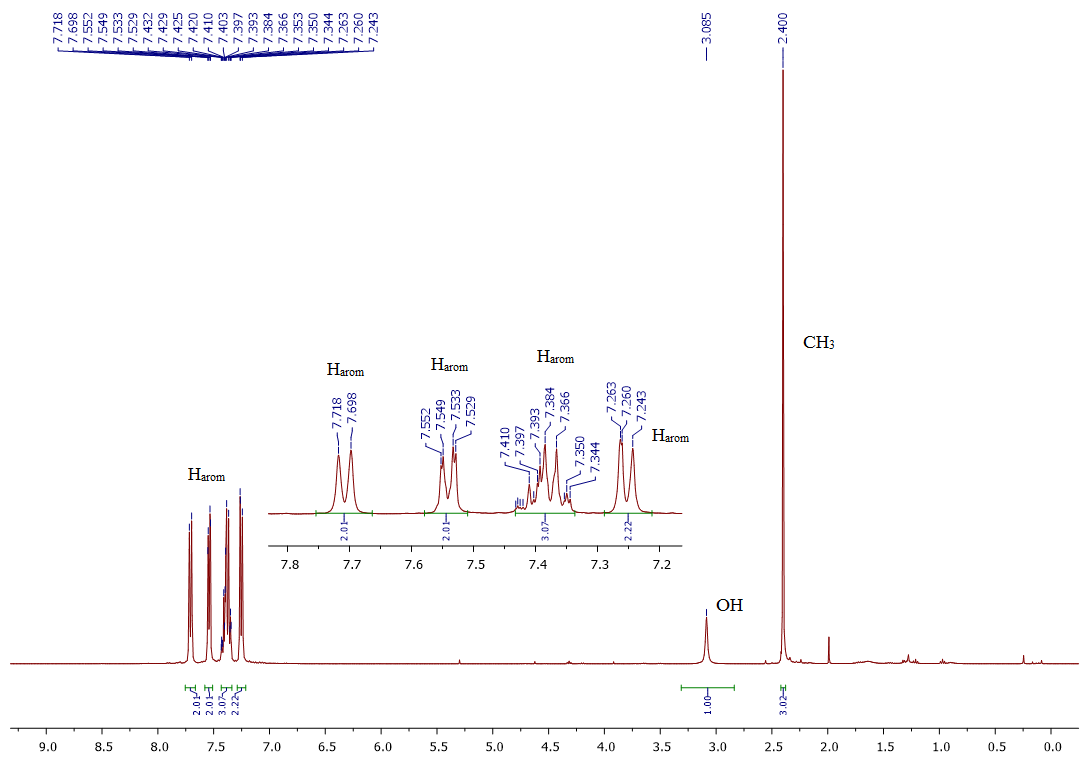


Figure S62. 1Н-NMR spectrum of the compound **1c** (CDCl3, 400 MHz).


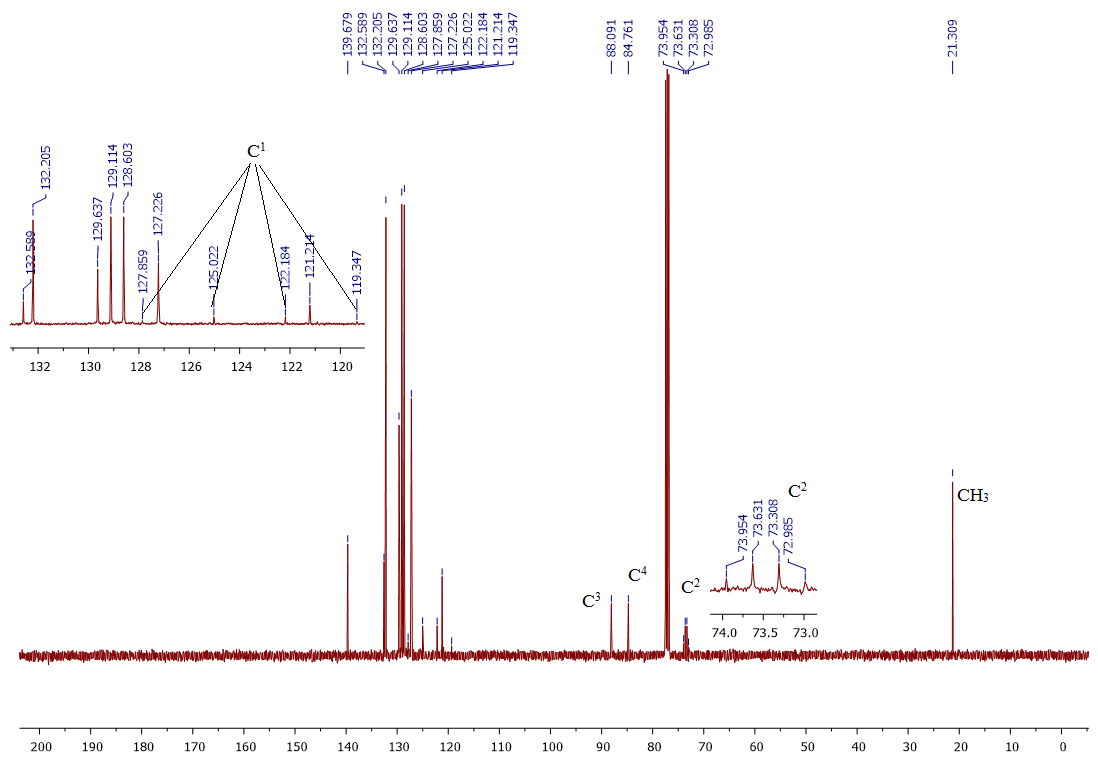


Figure S63. 13C-NMR spectrum of the compound **1c** (CDCl3, 100 MHz).


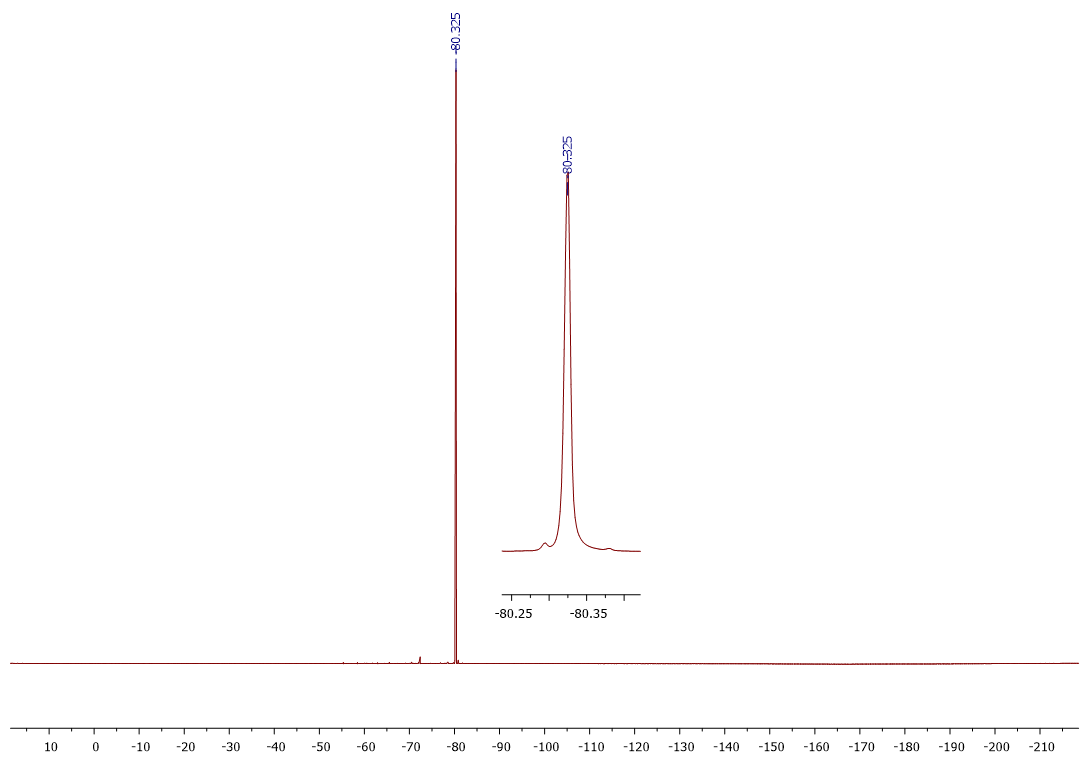


Figure S64. 19F-NMR spectrum of the compound **1c** (CDCl3, 376 MHz).


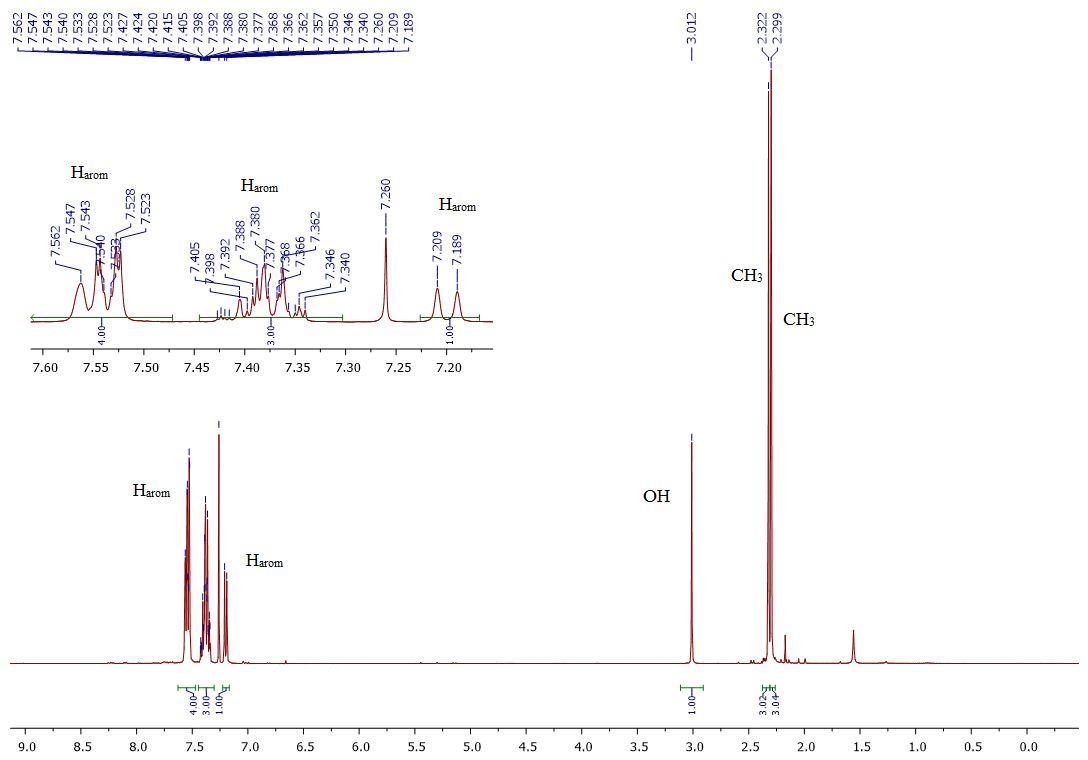


Figure S65. 1Н-NMR spectrum of the compound **1d** (CDCl3, 400 MHz).


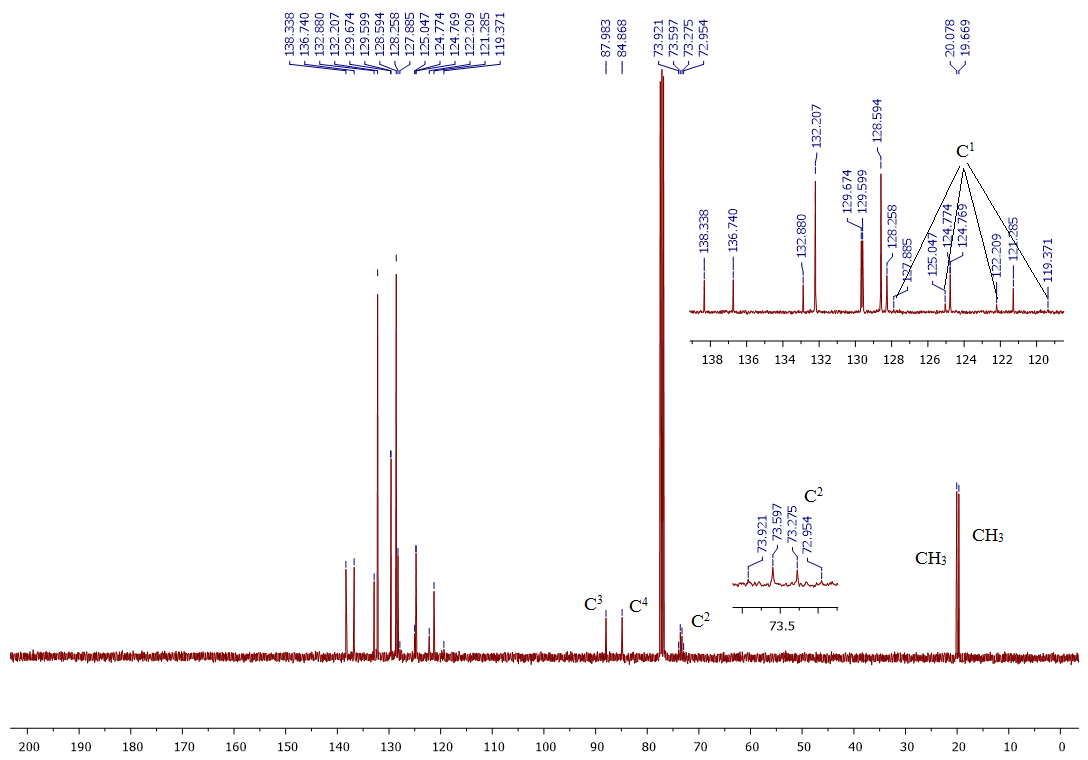


Figure S66. 13C-NMR spectrum of the compound **1d** (CDCl3, 100 MHz).


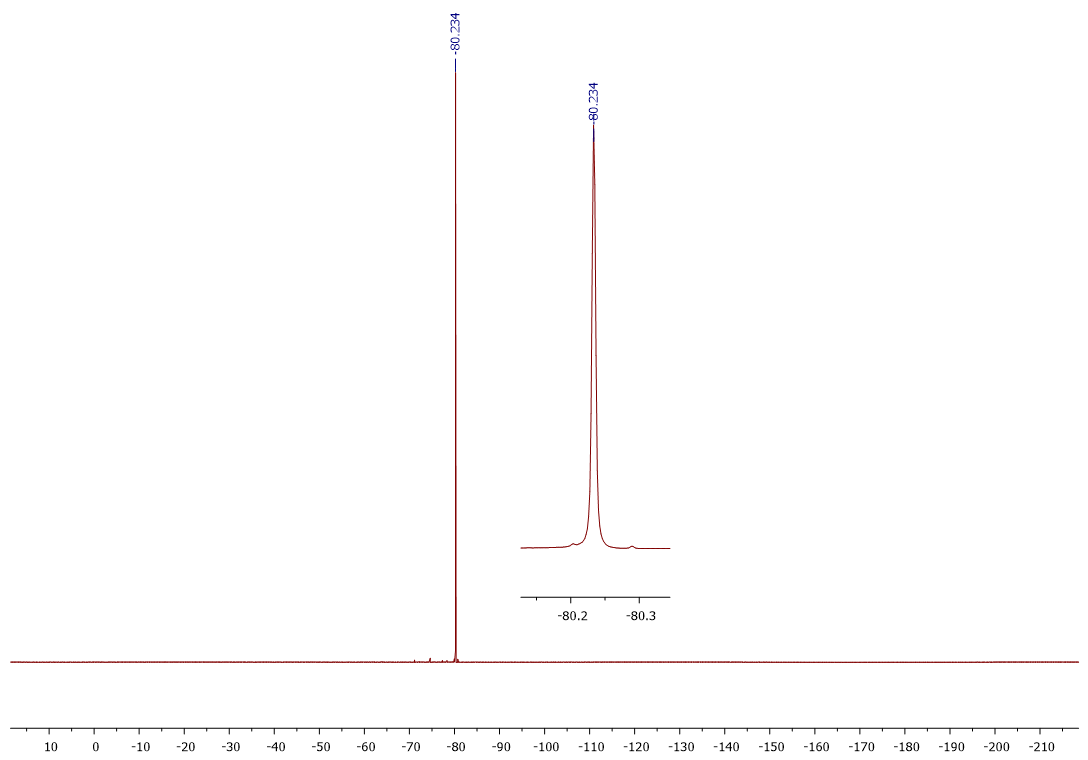


Figure S67. 19F-NMR spectrum of the compound **1d** (CDCl3, 376 MHz).


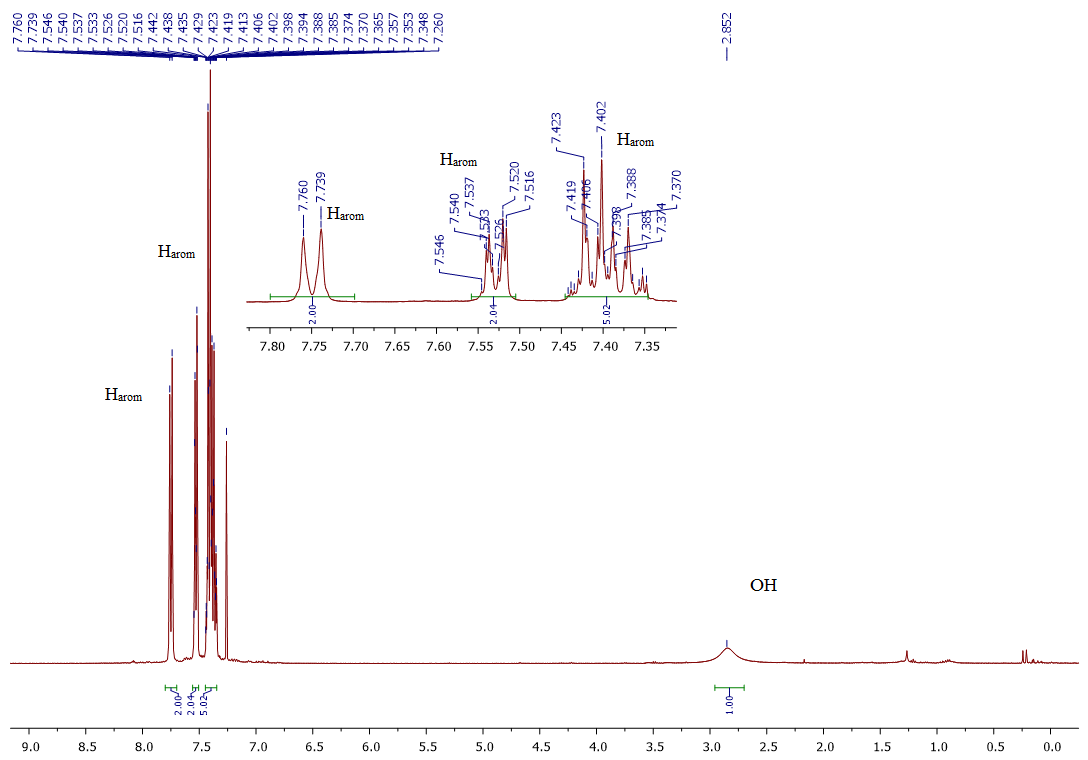


Figure S68. 1Н-NMR spectrum of the compound **1e** (CDCl3, 400 MHz).


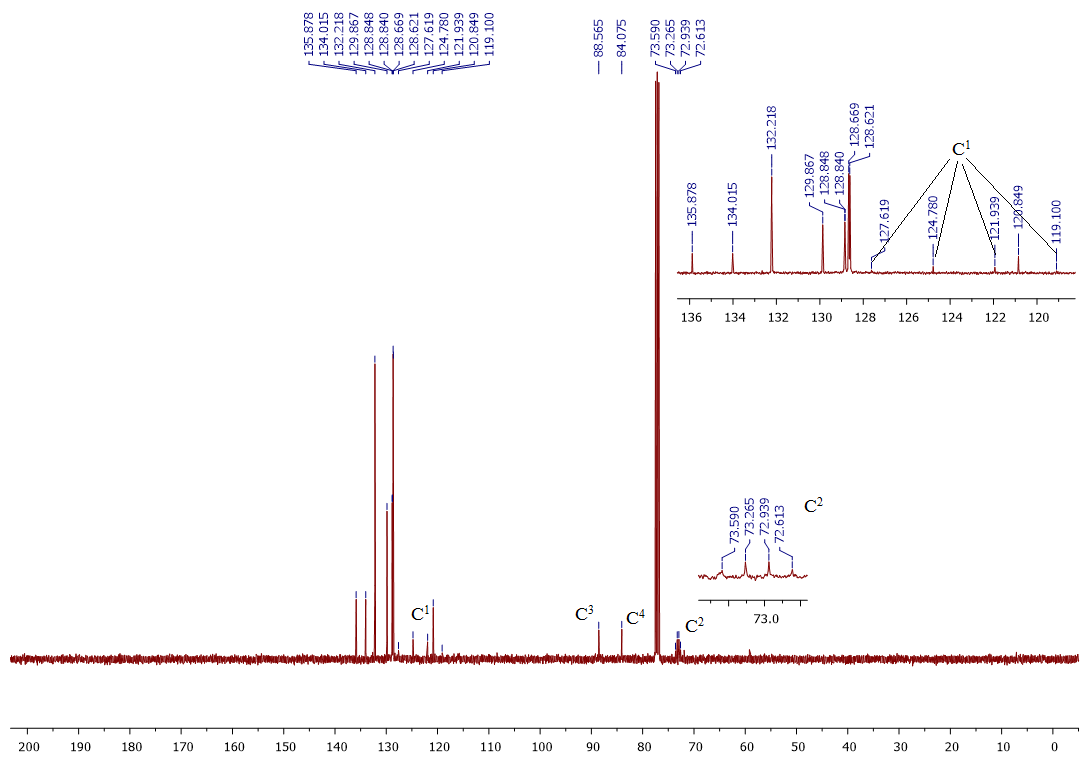


Figure S69. 13C-NMR spectrum of the compound **1e** (CDCl3, 100 MHz).


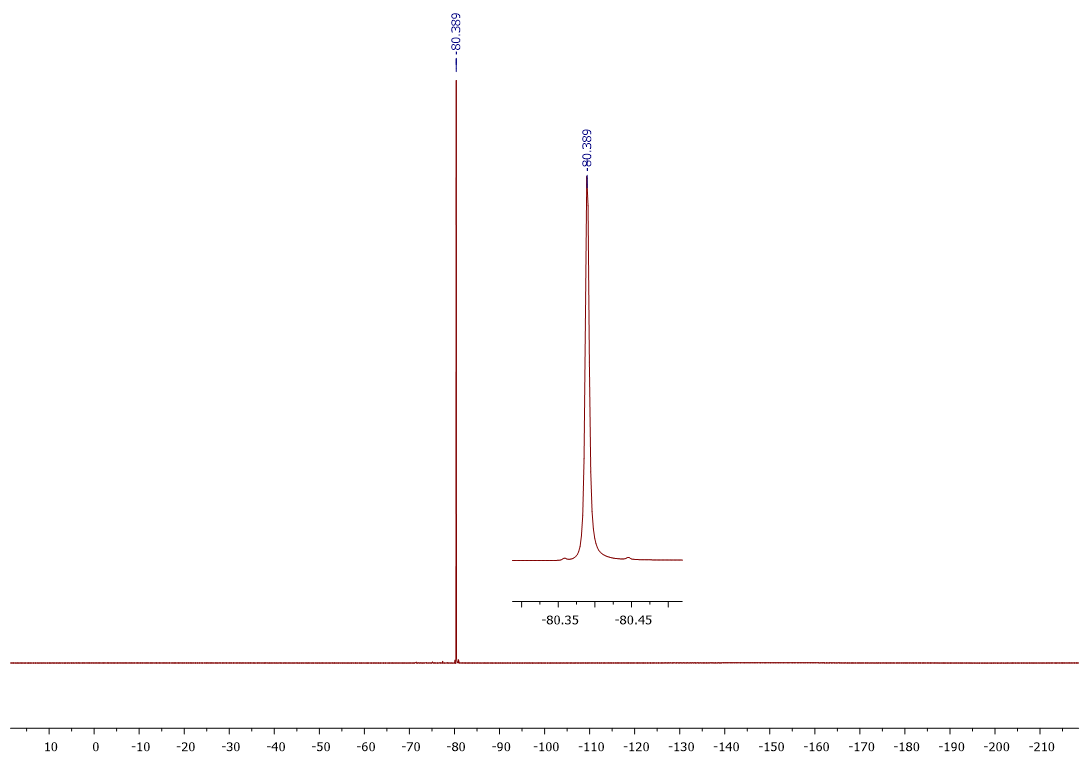


Figure S70. 19F-NMR spectrum of the compound **1e** (CDCl3, 376 MHz).


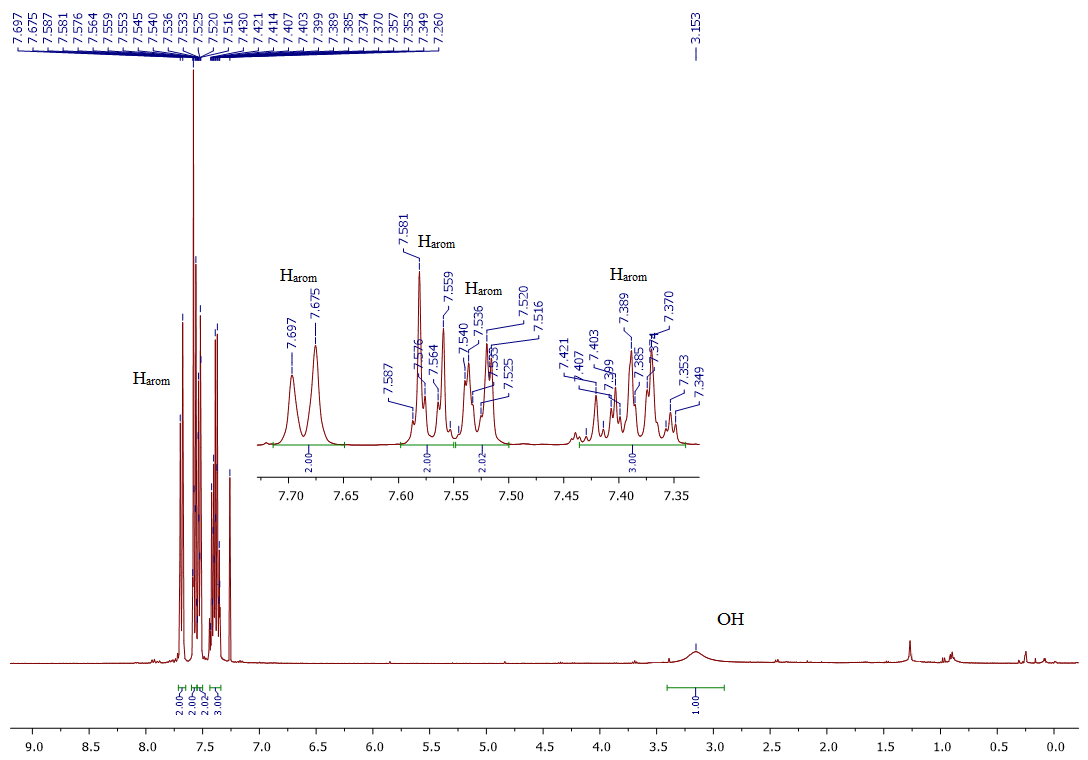


Figure S71. 1Н-NMR spectrum of the compound **1f** (CDCl3, 400 MHz).


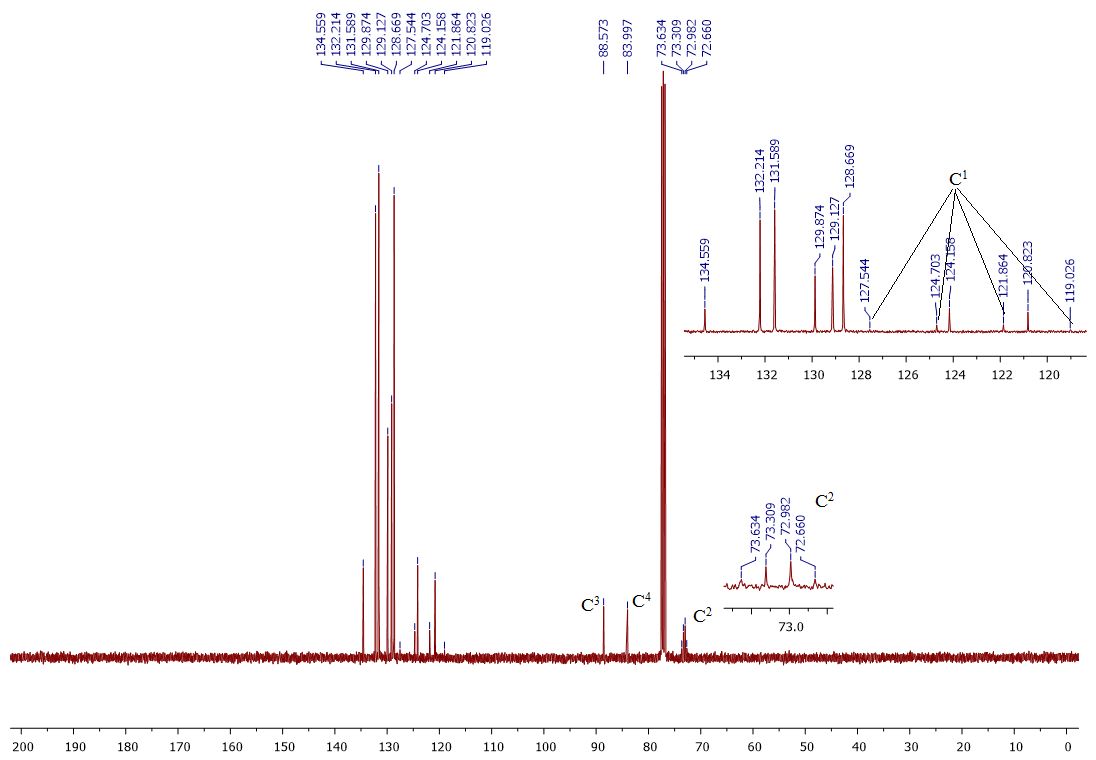


Figure S72. 13C-NMR spectrum of the compound **1f** (CDCl3, 100 MHz).


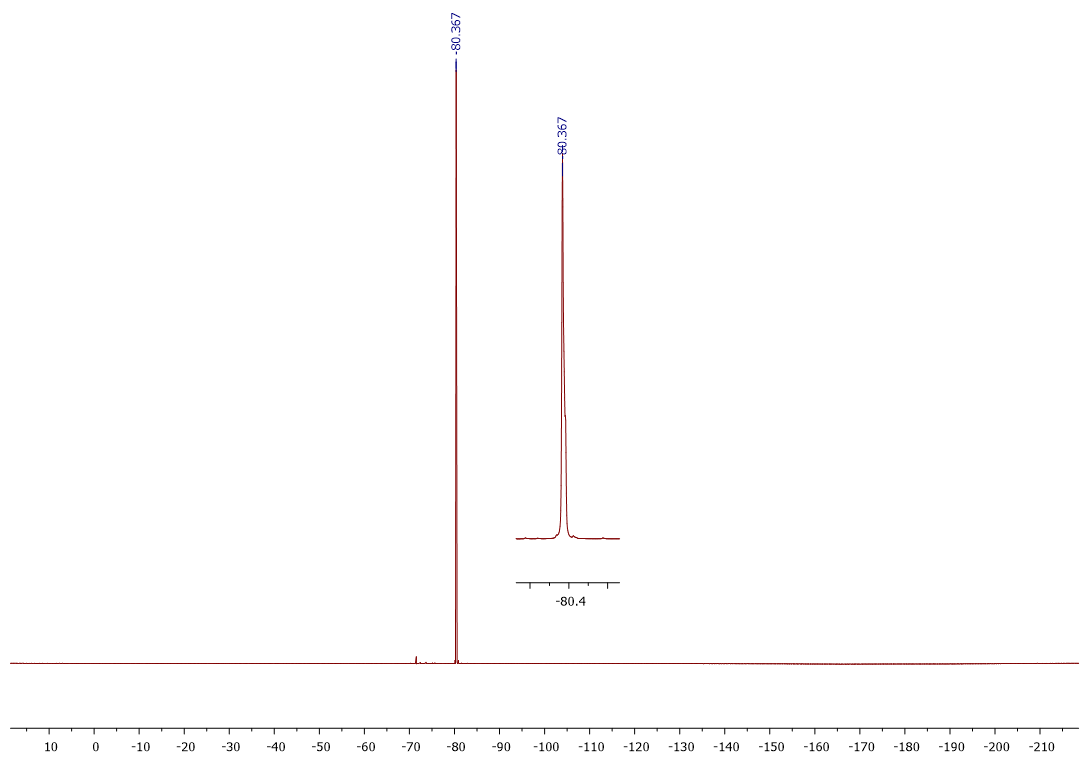


Figure S73. 19F-NMR spectrum of the compound **1f** (CDCl3, 376 MHz).


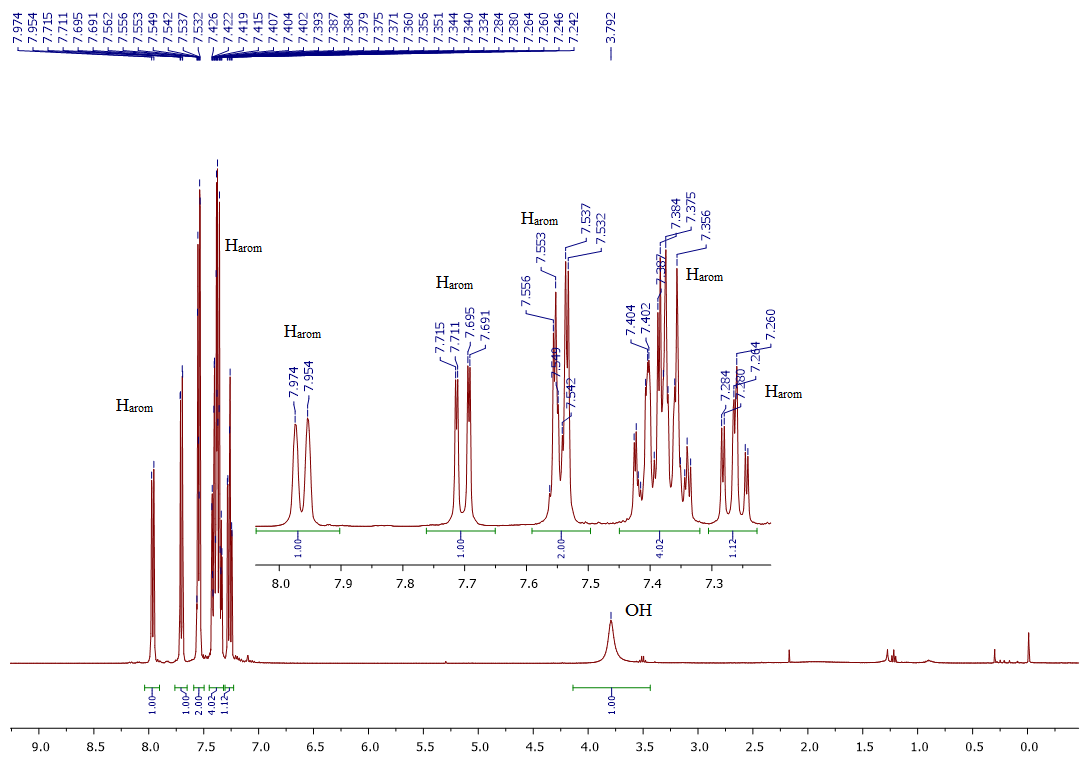


Figure S74. 1Н-NMR spectrum of the compound **1g** (CDCl3, 400 MHz).


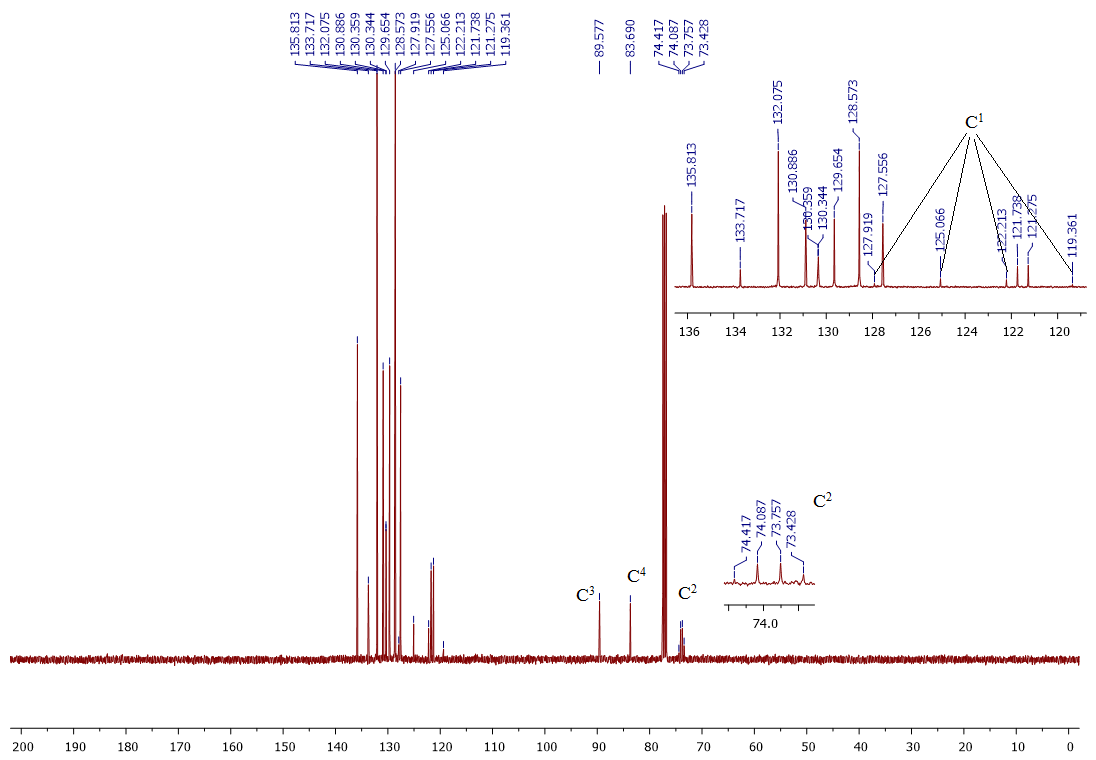


Figure S75. 13C-NMR spectrum of the compound **1g** (CDCl3, 100 MHz).


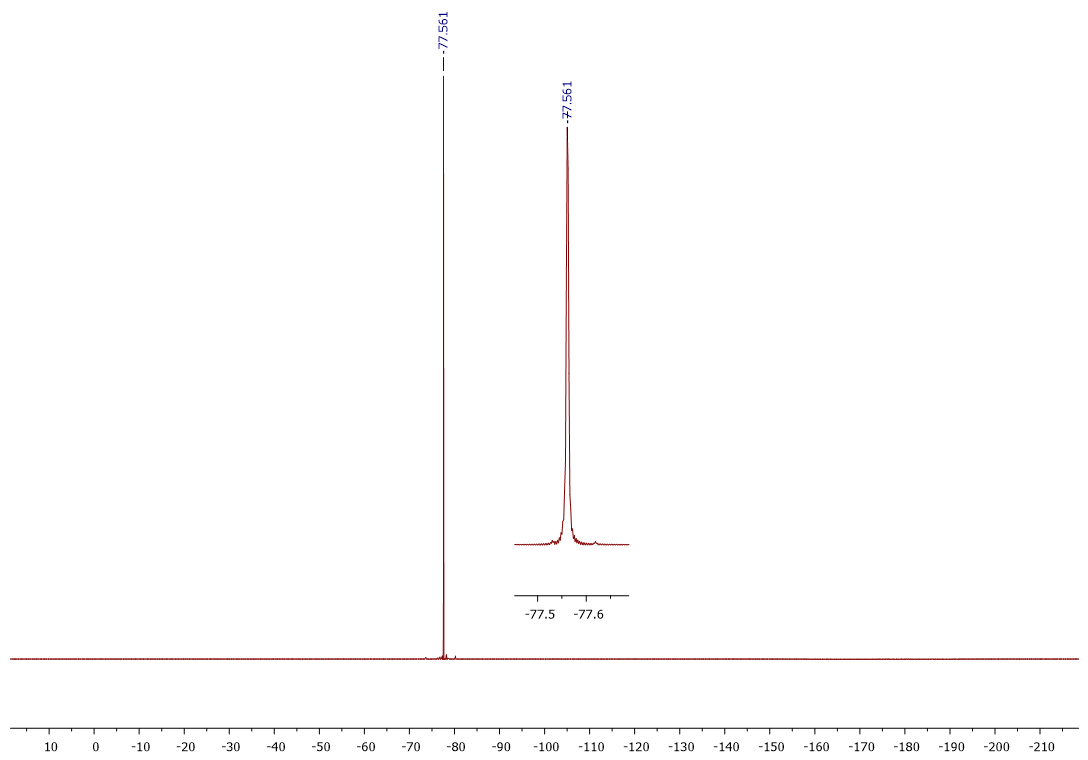


Figure S76. 19F-NMR spectrum of the compound **1g** (CDCl3, 376 MHz).


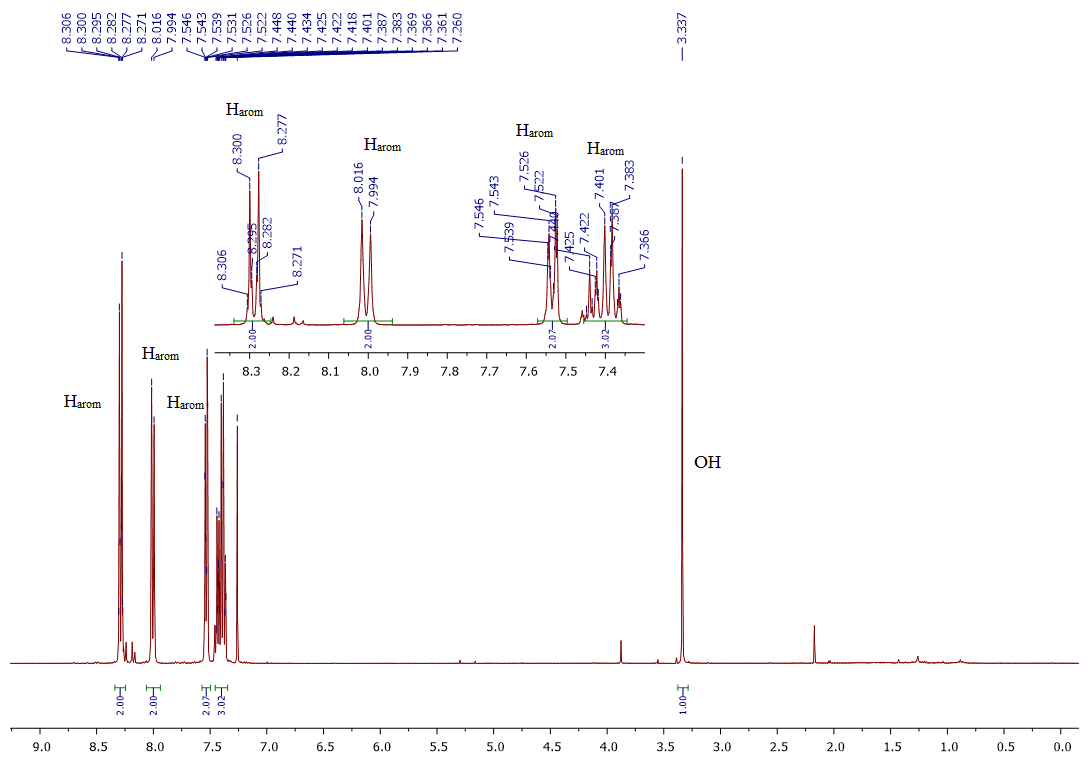


Figure S77. 1Н-NMR spectrum of the compound **1h** (CDCl3, 400 MHz).


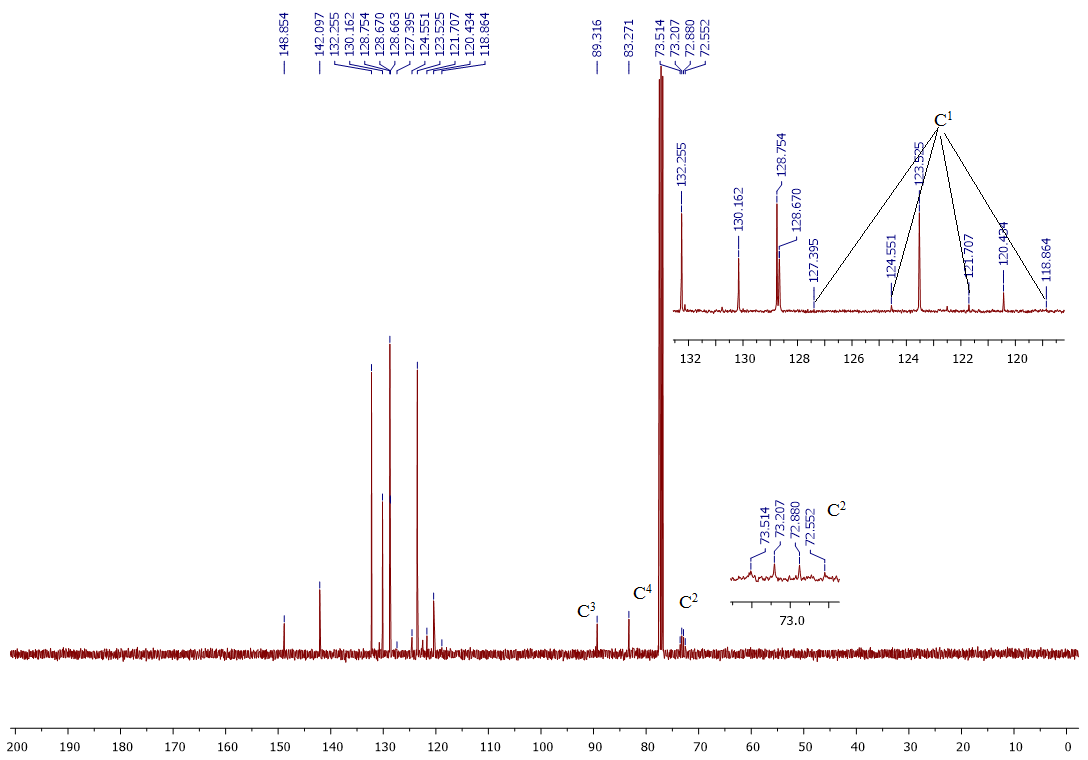


Figure S78. 13C-NMR spectrum of the compound **1h** (CDCl3, 100 MHz).


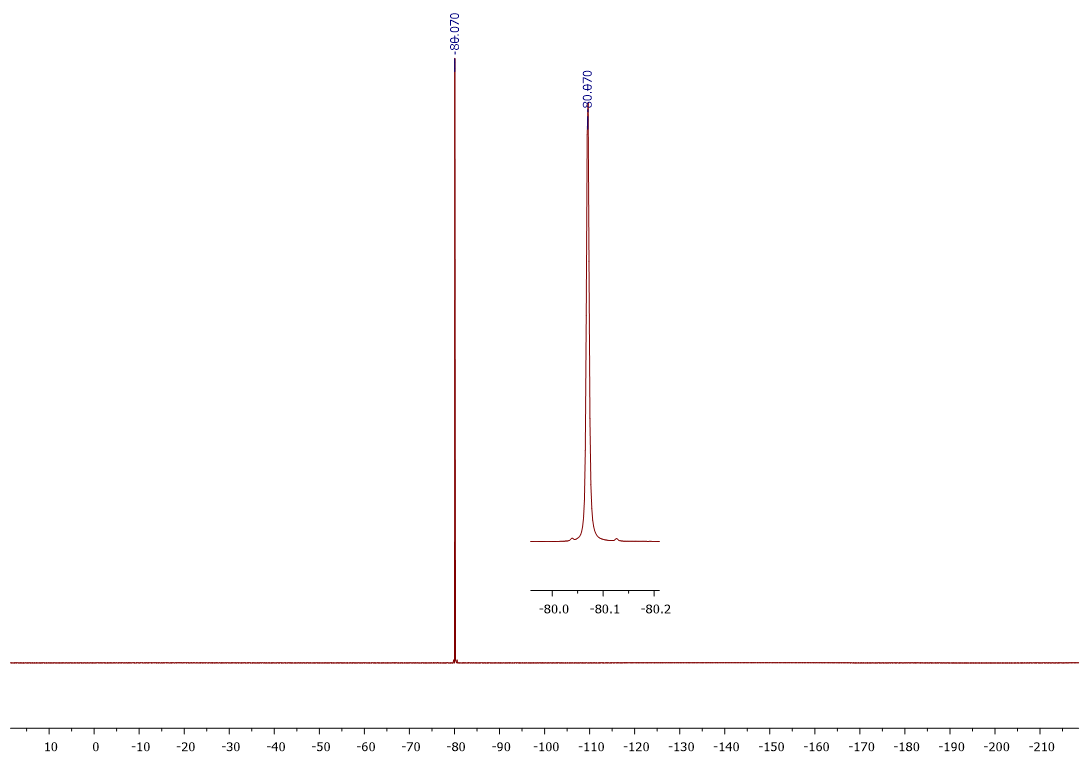


Figure S79. 19F-NMR spectrum of the compound **1h** (CDCl3, 376 MHz).


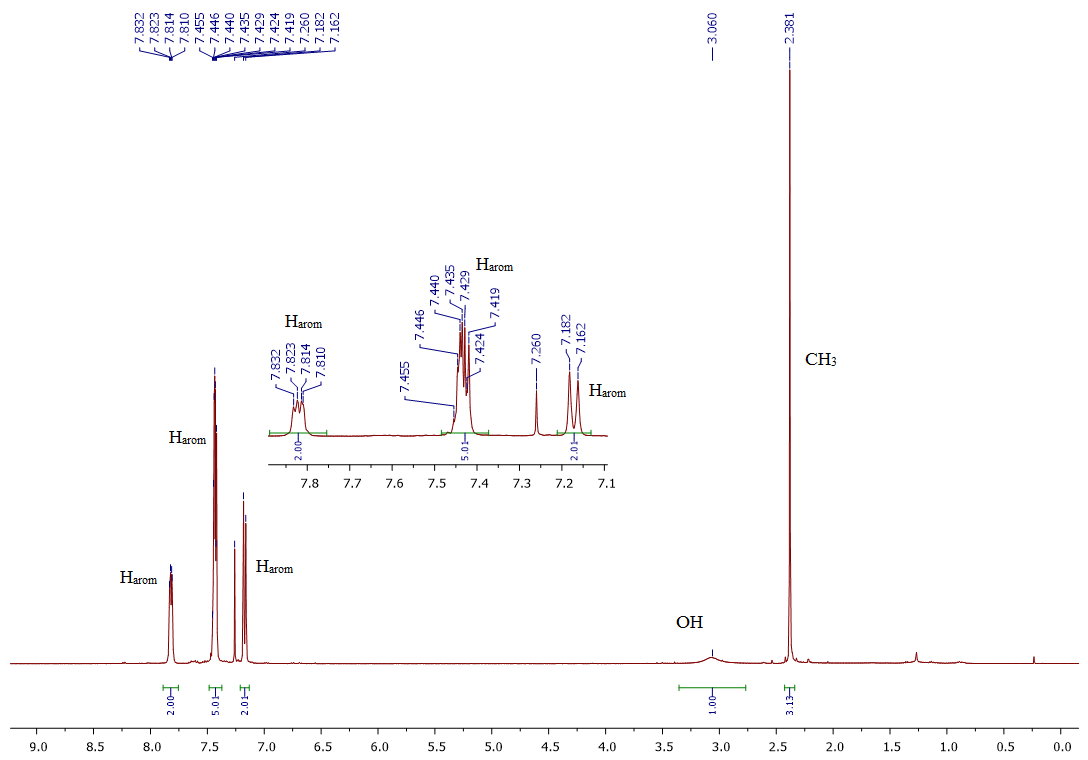


Figure S80. 1Н-NMR spectrum of the compound **1i** (CDCl3, 400 MHz).


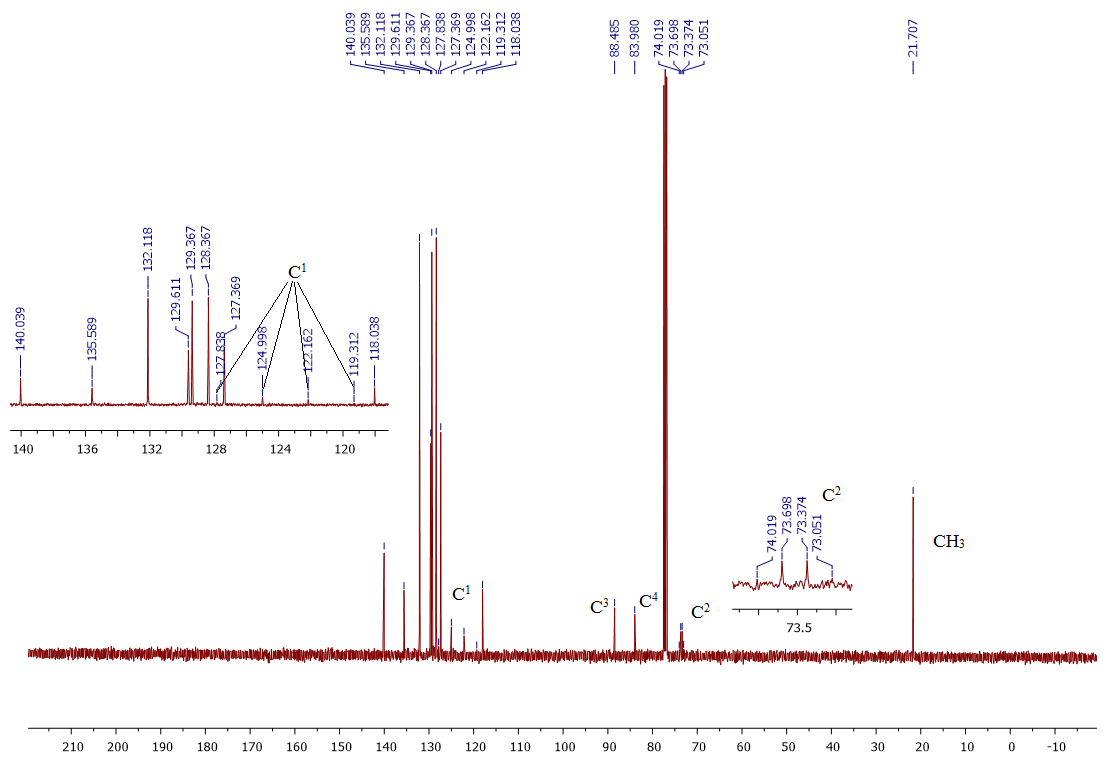


Figure S81. 13C-NMR spectrum of the compound **1i** (CDCl3, 100 MHz).


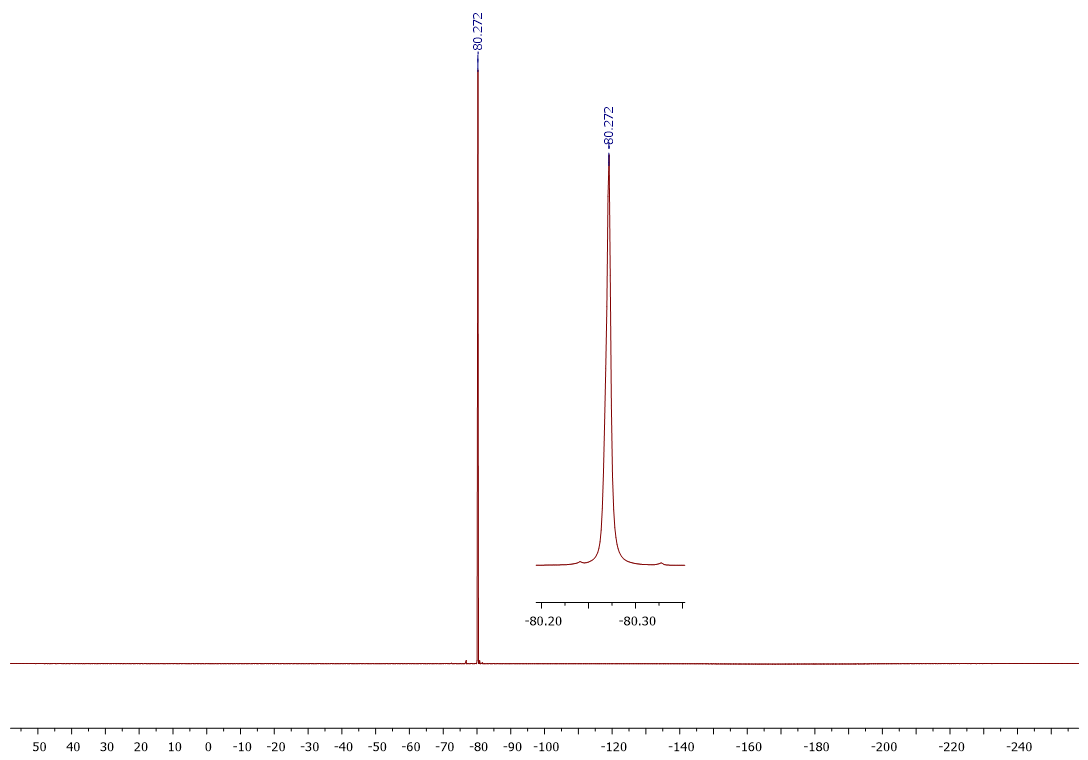


Figure S82. 19F-NMR spectrum of the compound **1i** (CDCl3, 376 MHz).


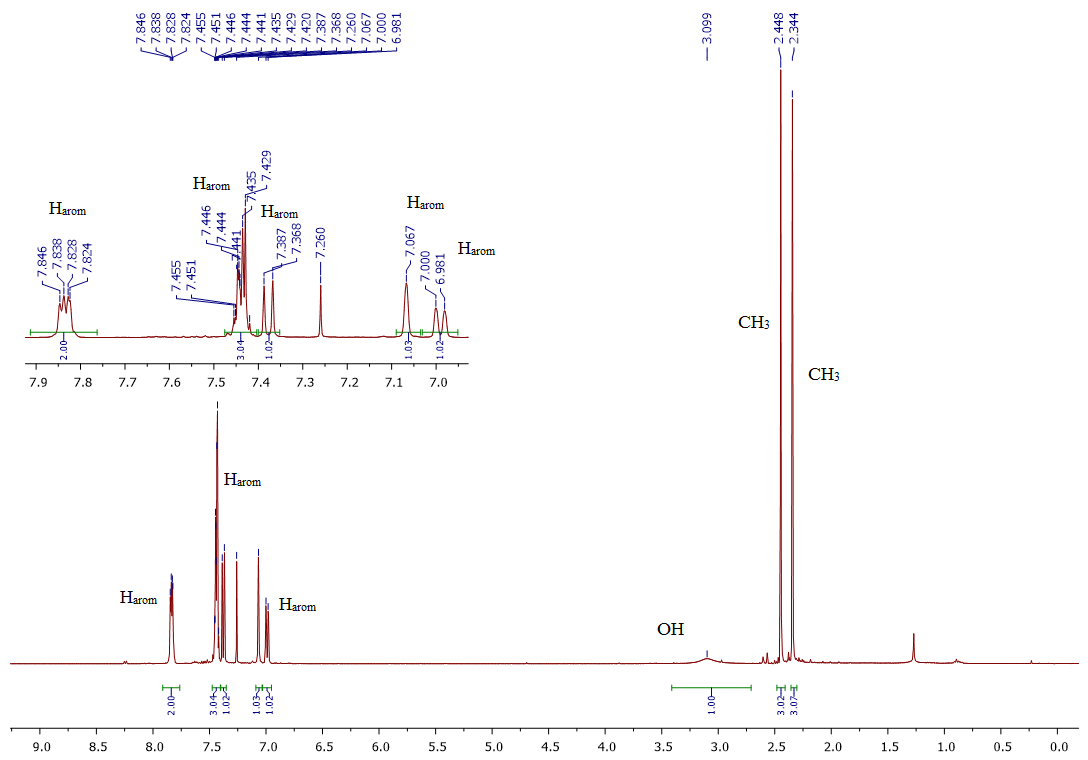


Figure S83. 1Н-NMR spectrum of the compound **1j** (CDCl3, 400 MHz).


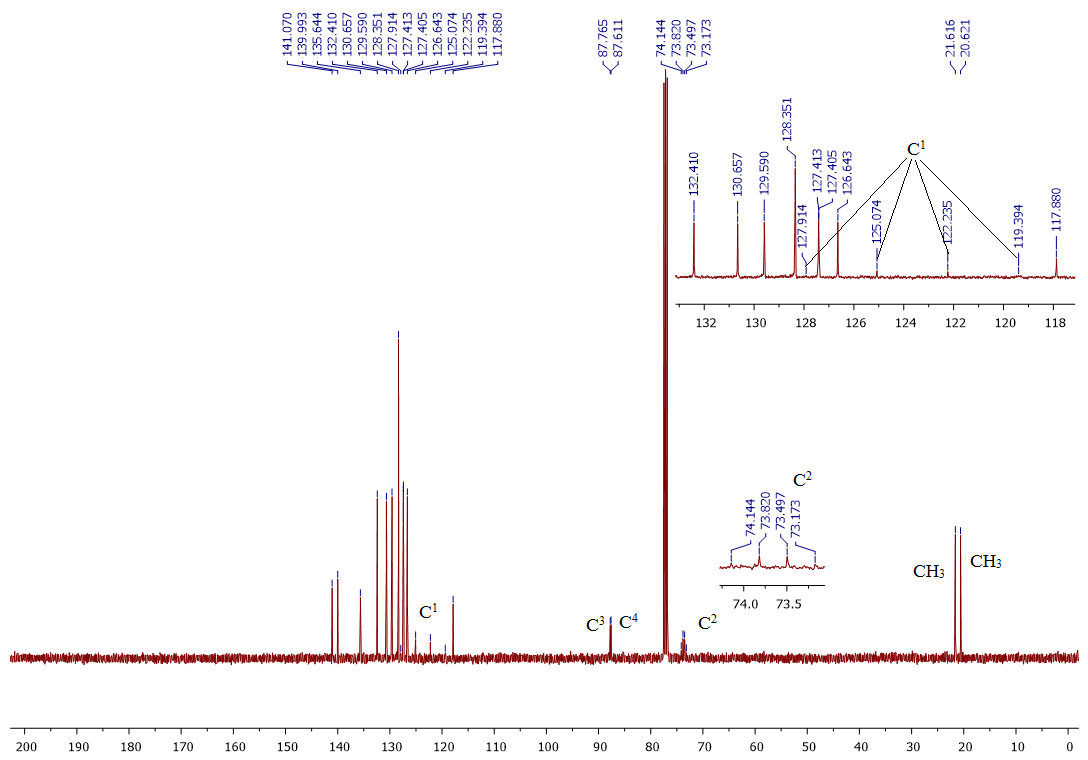


Figure S84. 13C-NMR spectrum of the compound **1j** (CDCl3, 100 MHz).


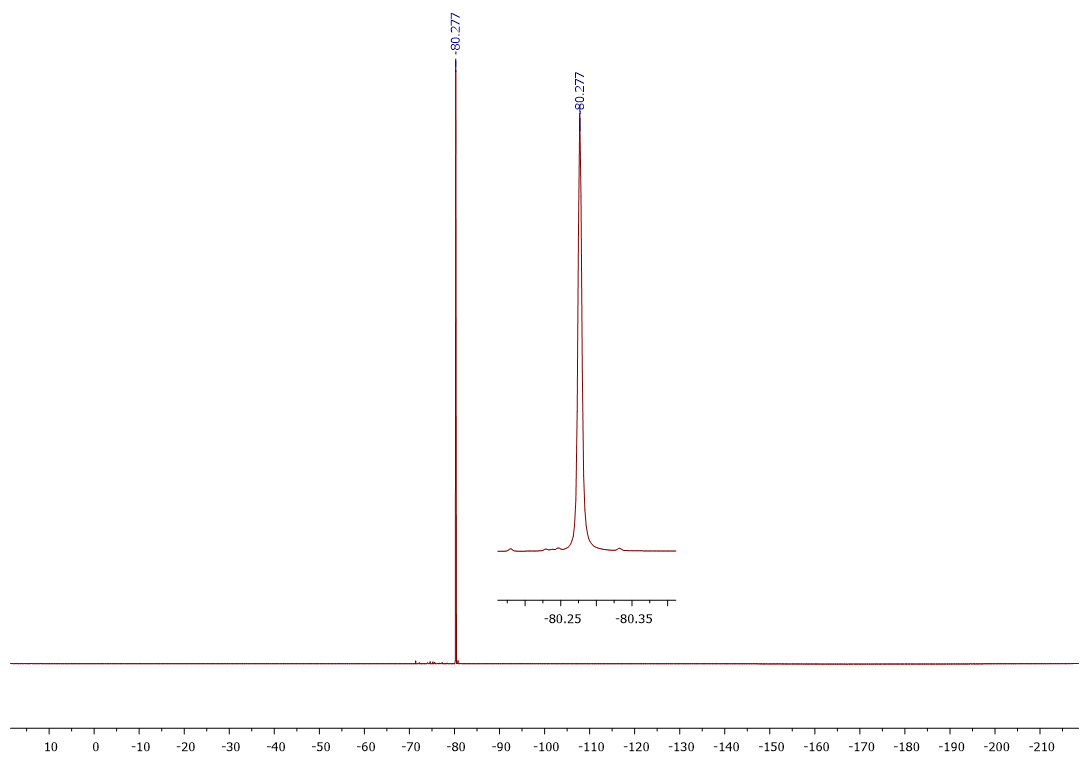


Figure S85. 19F-NMR spectrum of the compound **1j** (CDCl3, 376 MHz).


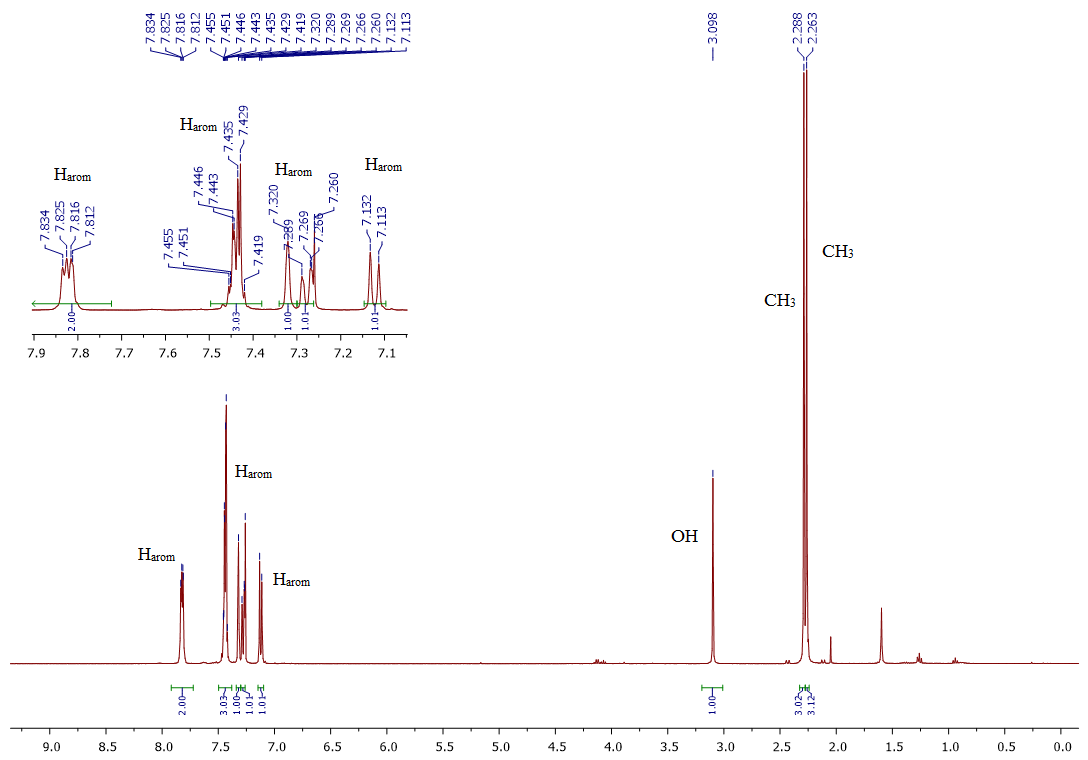


Figure S86. 1Н-NMR spectrum of the compound **1k** (CDCl3, 400 MHz).


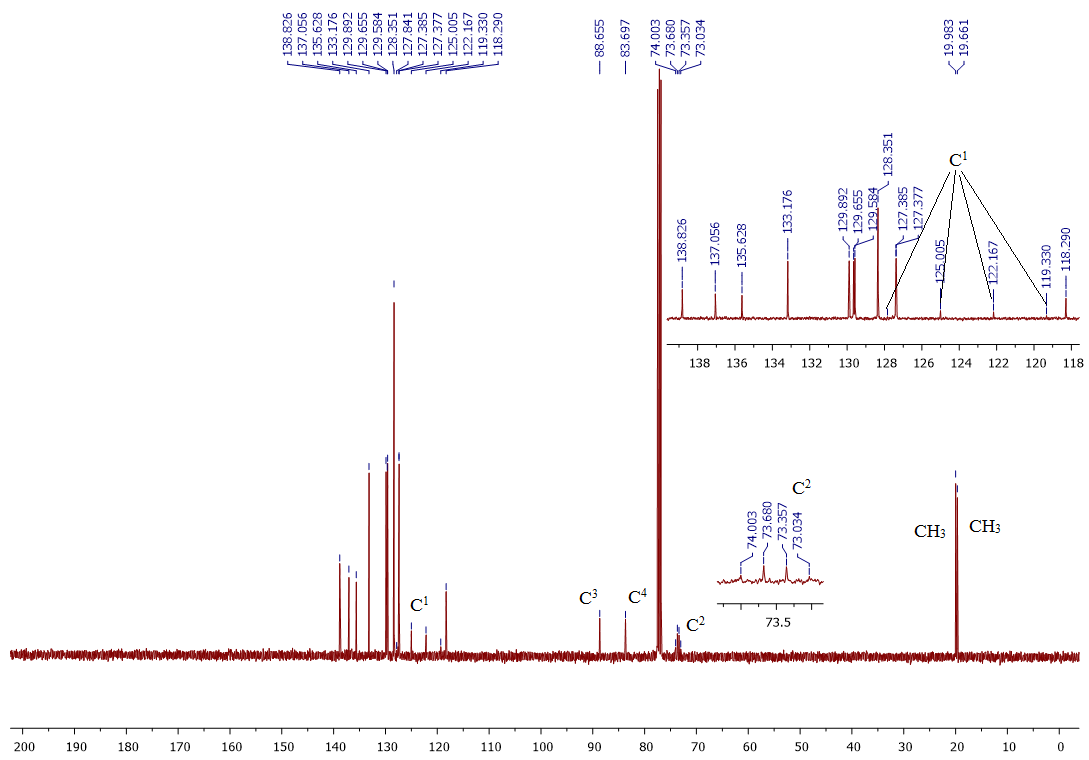


Figure S87. 13C-NMR spectrum of the compound **1k** (CDCl3, 100 MHz).


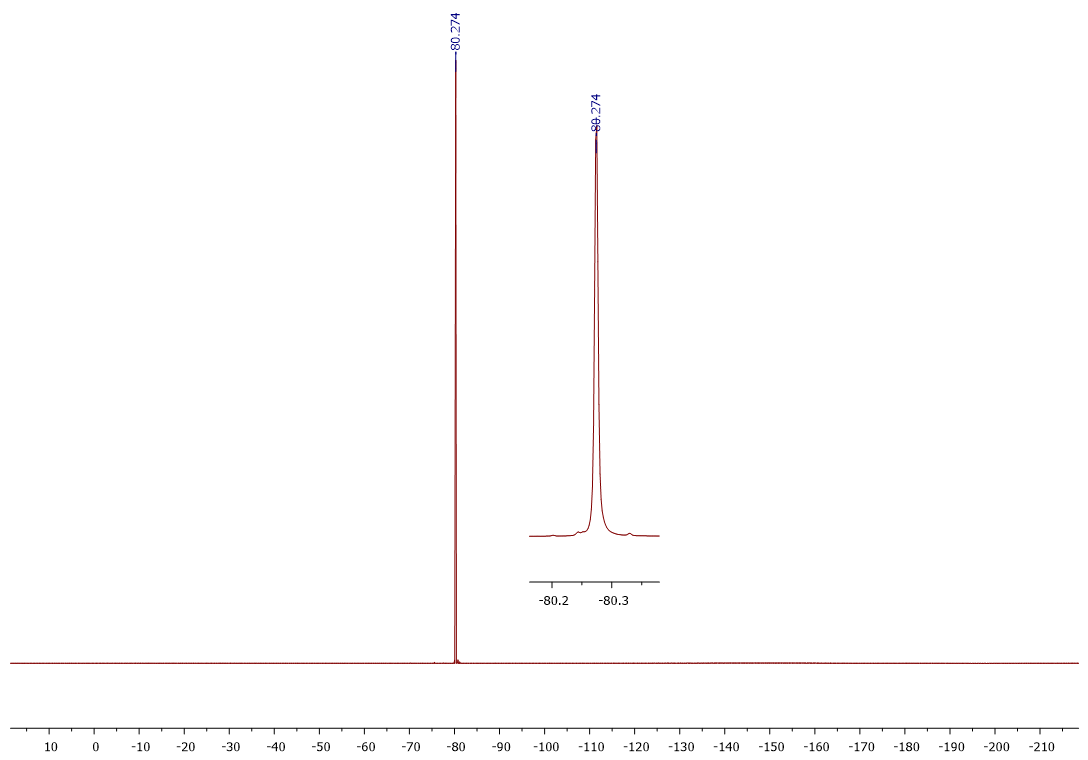


Figure S88. 19F-NMR spectrum of the compound **1k** (CDCl3, 376 MHz).


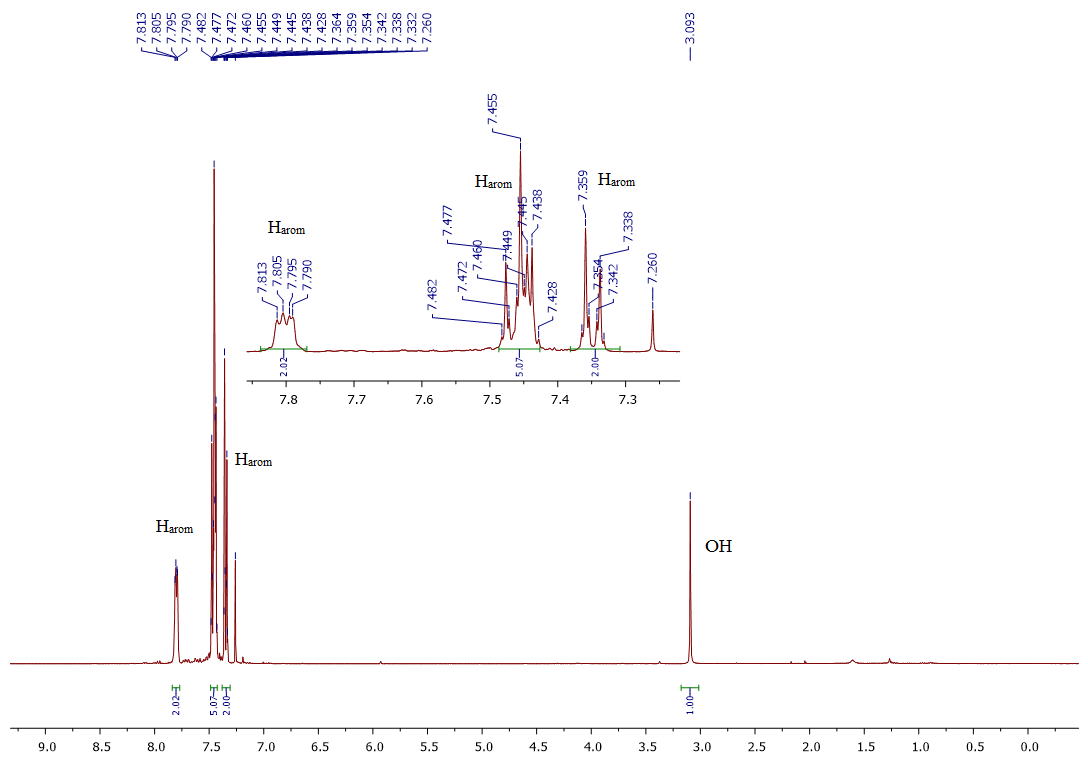


Figure S89. 1Н-NMR spectrum of the compound **1l** (CDCl3, 400 MHz).


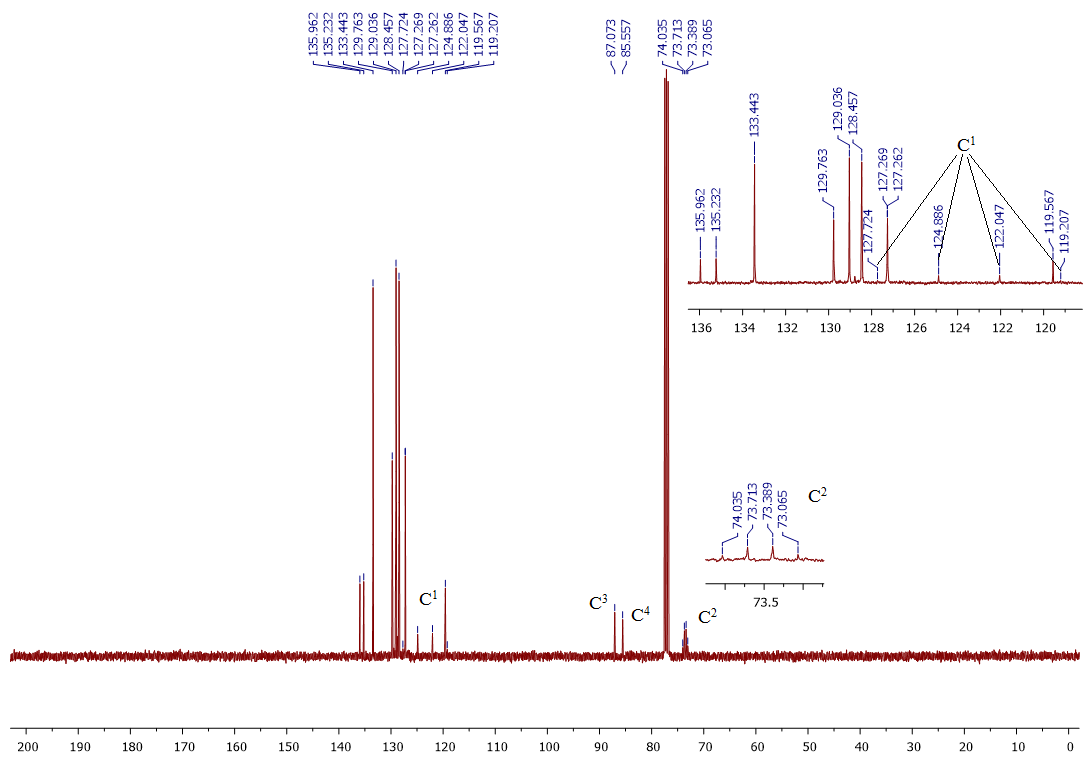


Figure S90. 13C-NMR spectrum of the compound **1l** (CDCl3, 100 MHz).


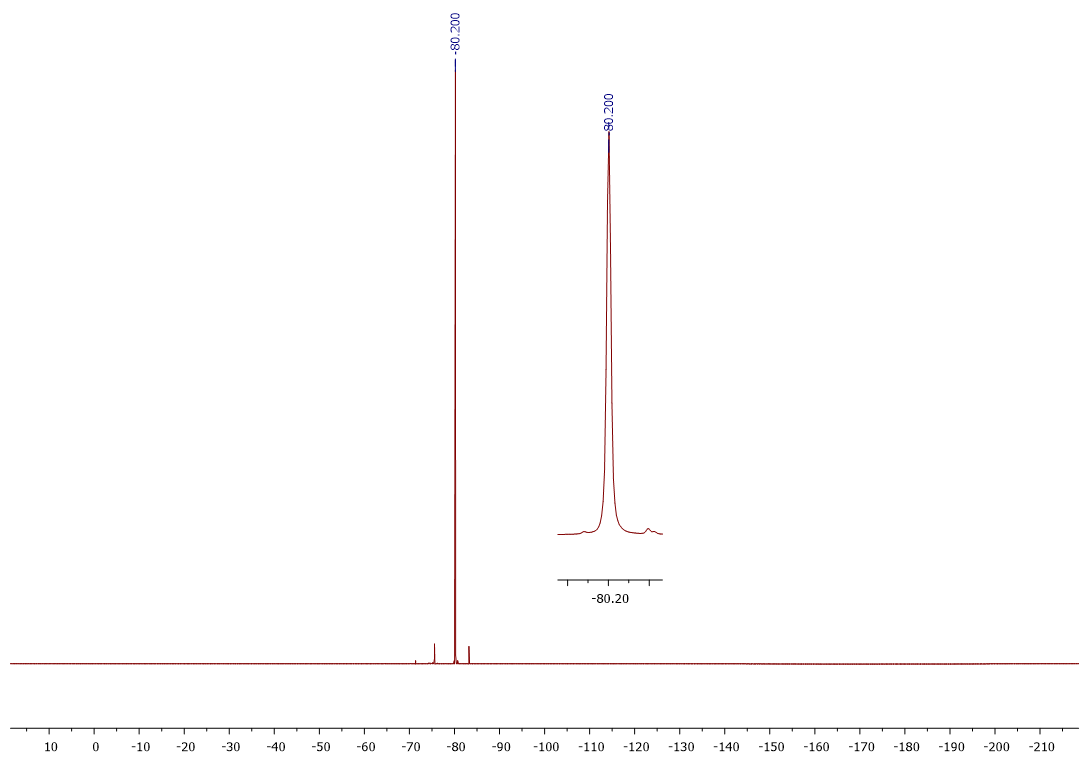


Figure S91. 19F-NMR spectrum of the compound **1l** (CDCl3, 376 MHz).


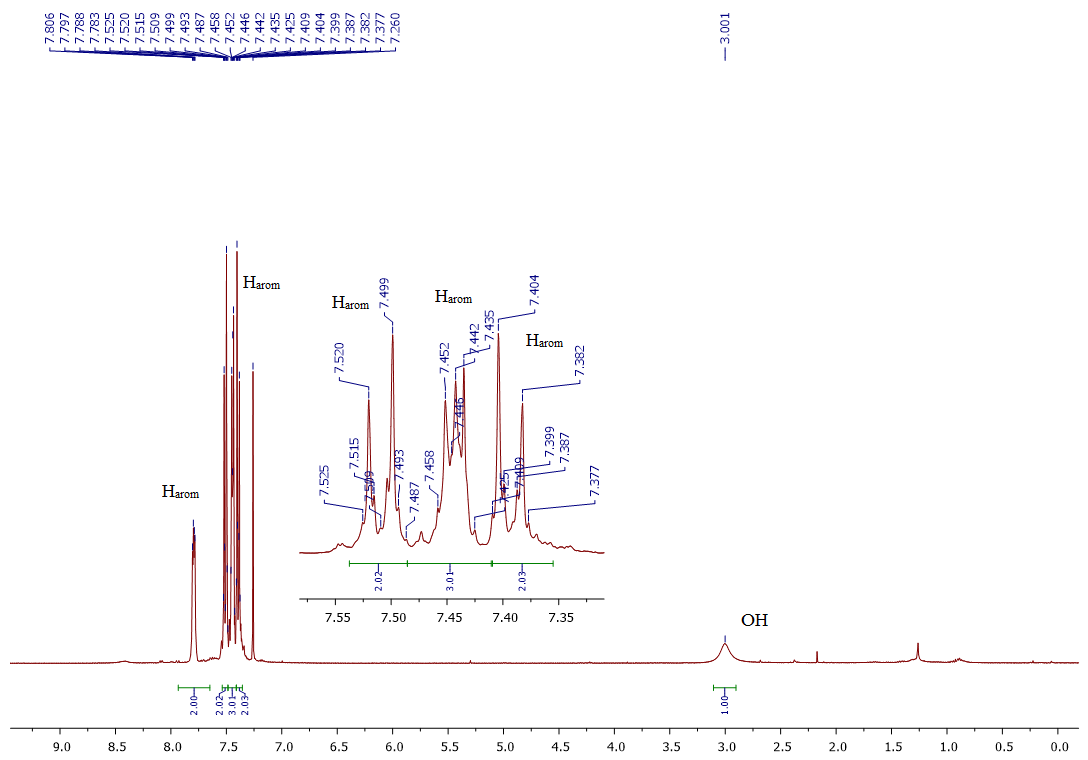


Figure S92. 1Н-NMR spectrum of the compound **1m** (CDCl3, 400 MHz).


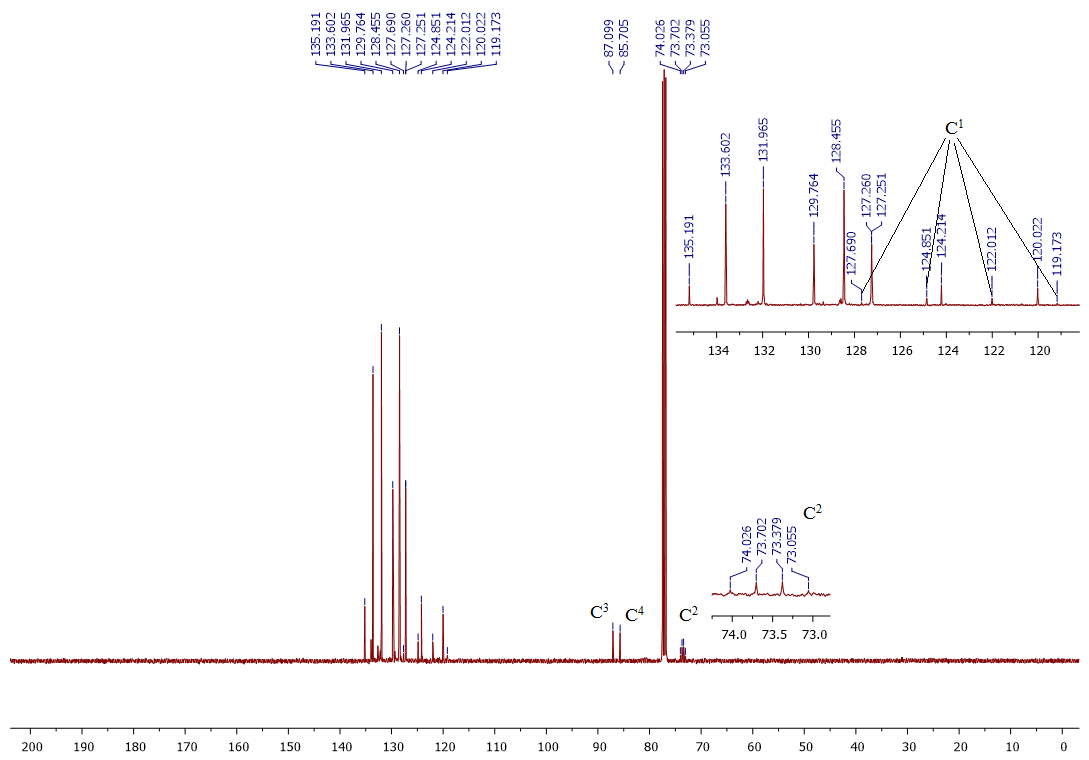


Figure S93. 13C-NMR spectrum of the compound **1m** (CDCl3, 100 MHz).


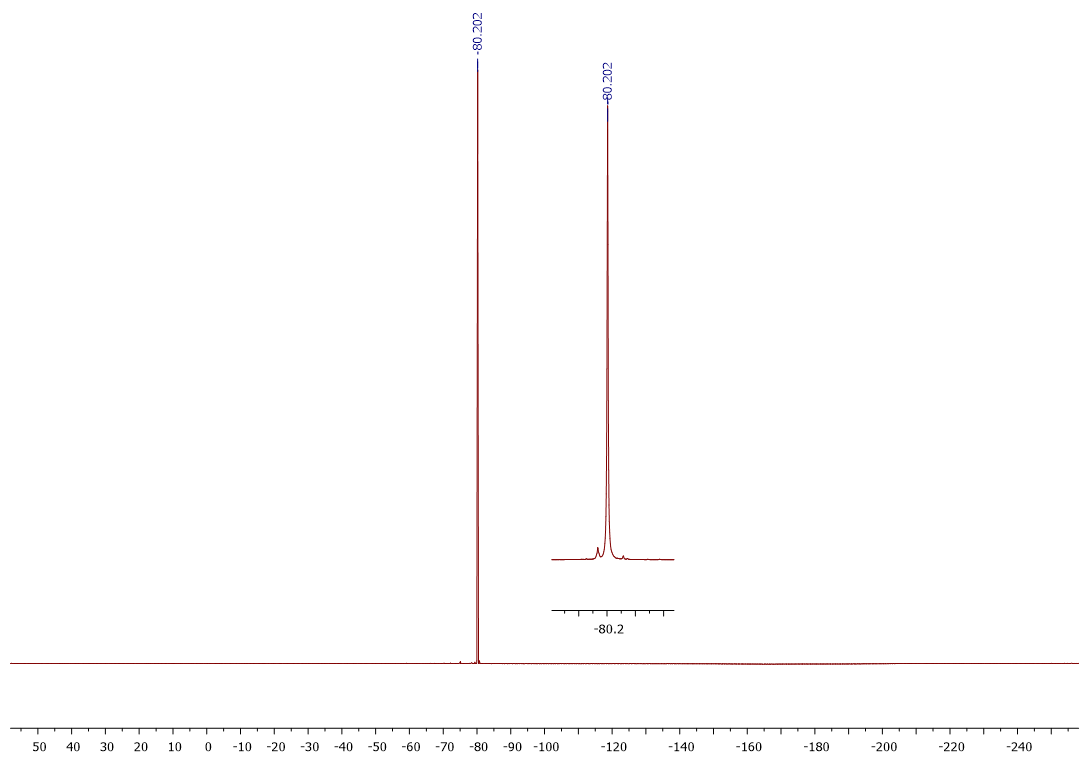


Figure S94. 19F-NMR spectrum of the compound **1m** (CDCl3, 376 MHz).


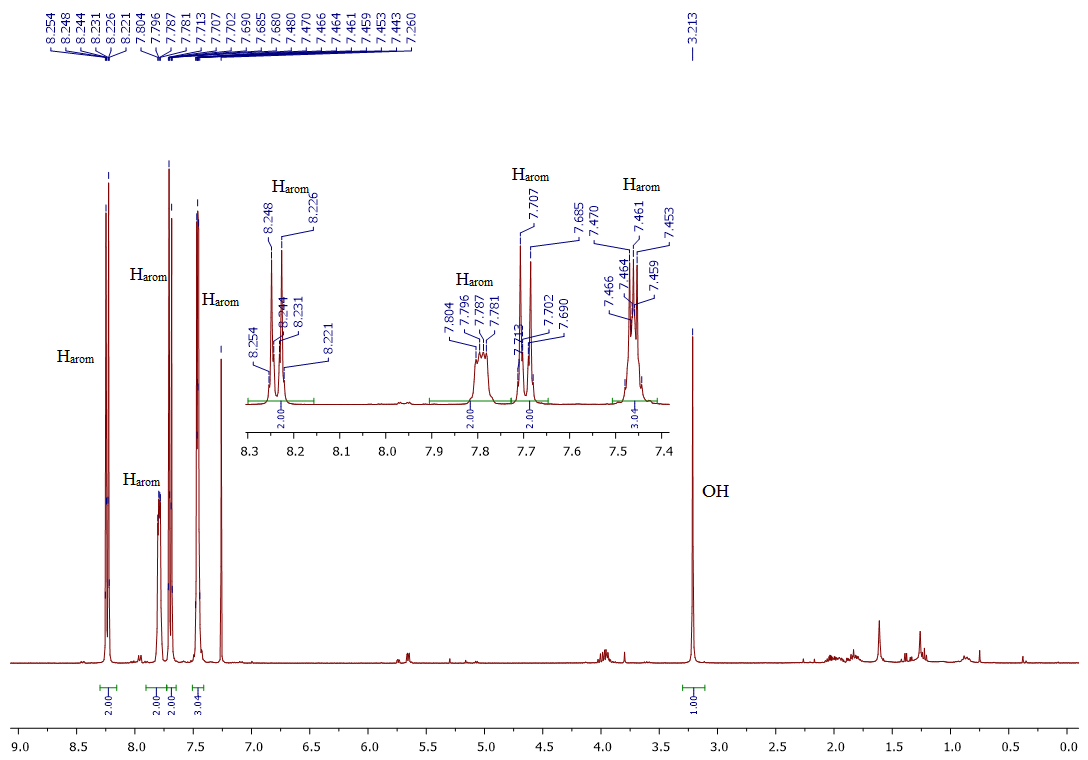


Figure S95. 1Н-NMR spectrum of the compound **1n** (CDCl3, 400 MHz).


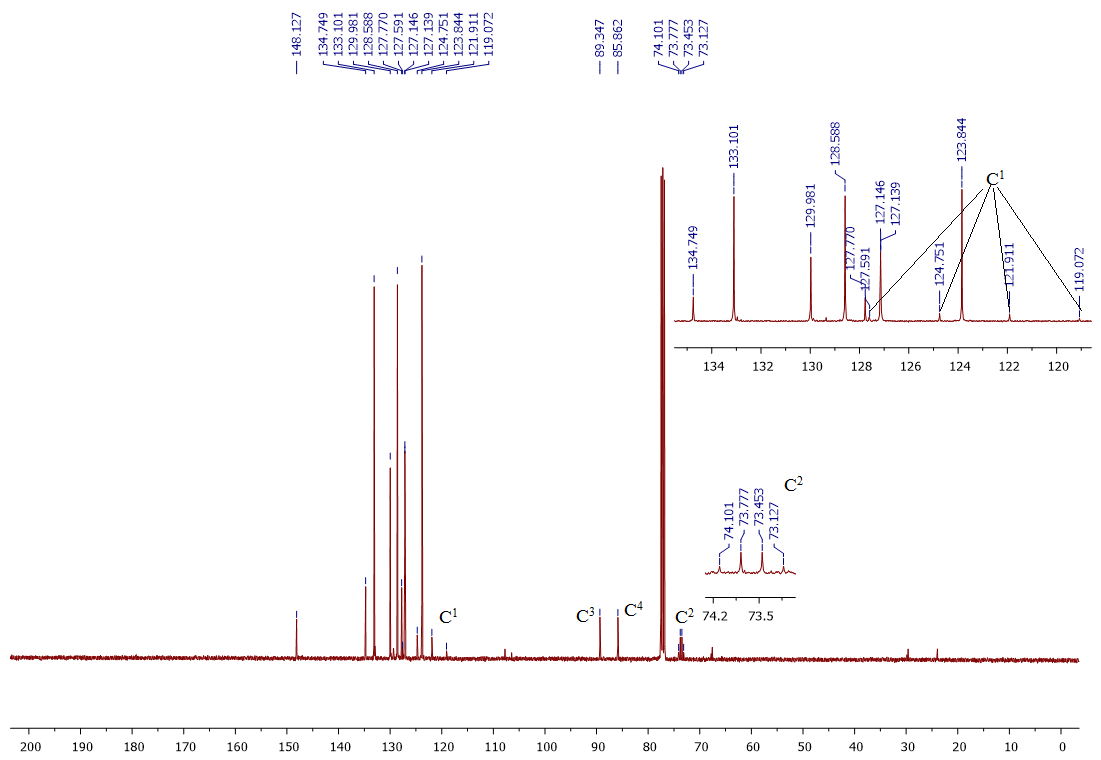


Figure S96. 13C-NMR spectrum of the compound **1n** (CDCl3, 100 MHz).


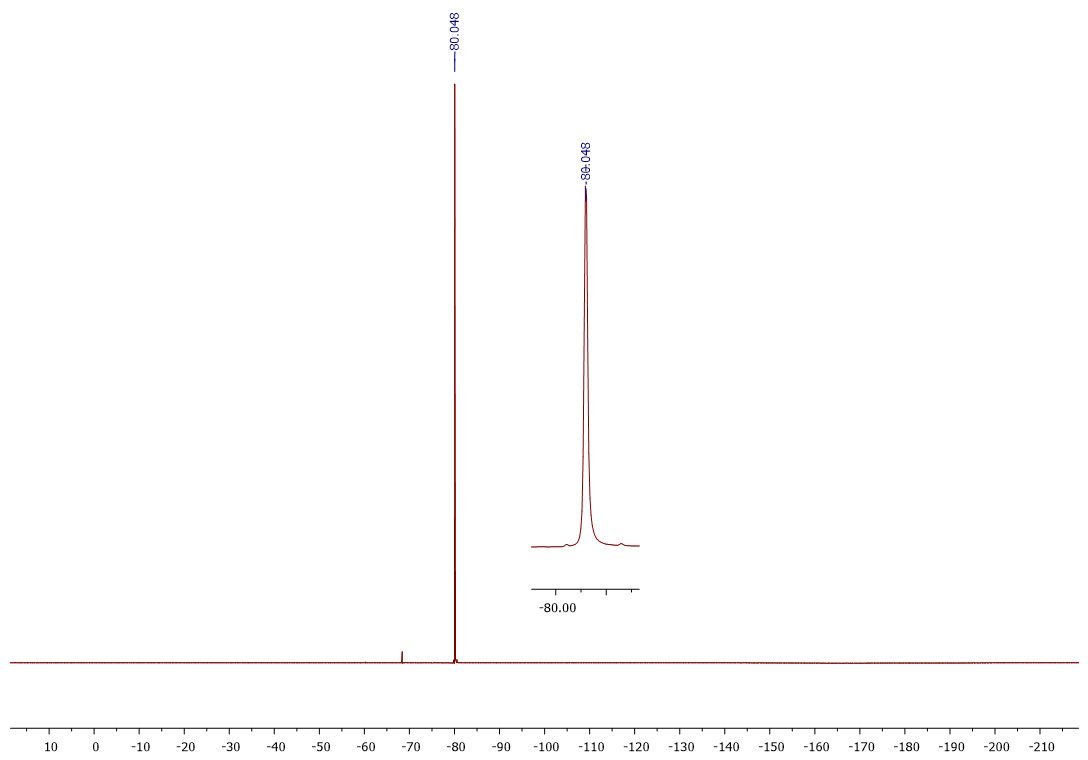


Figure S97. 19F-NMR spectrum of the compound **1n** (CDCl3, 376 MHz).


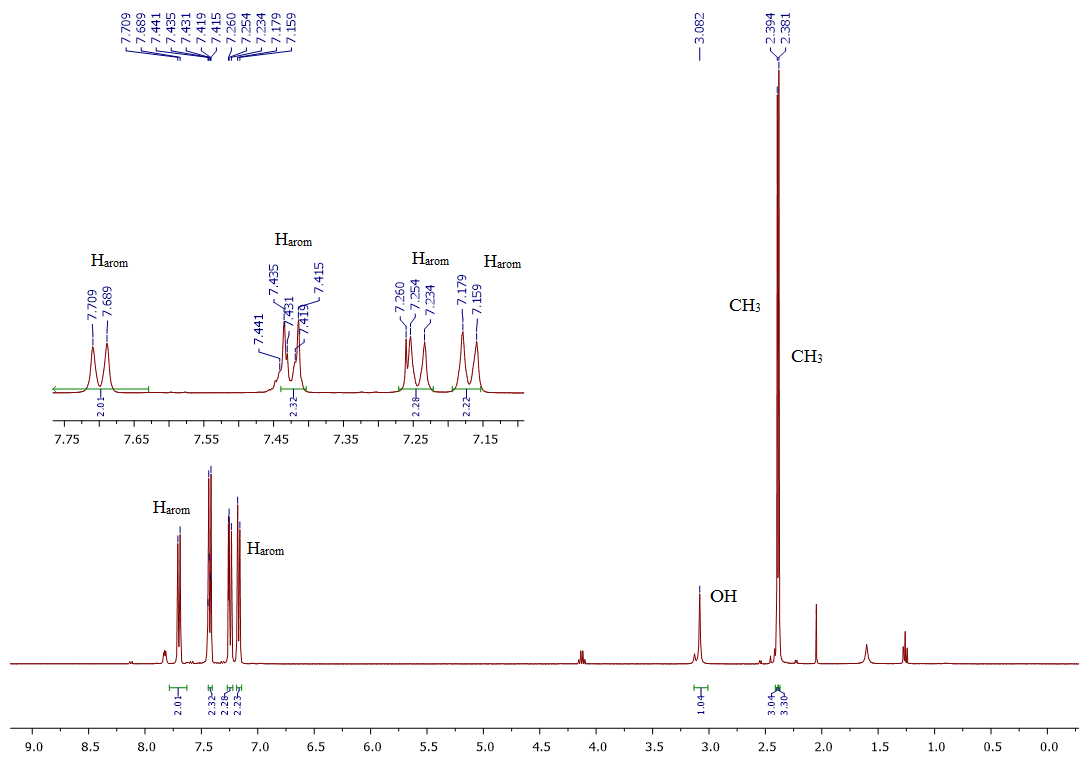


Figure S98. 1Н-NMR spectrum of the compound **1o** (CDCl3, 400 MHz).


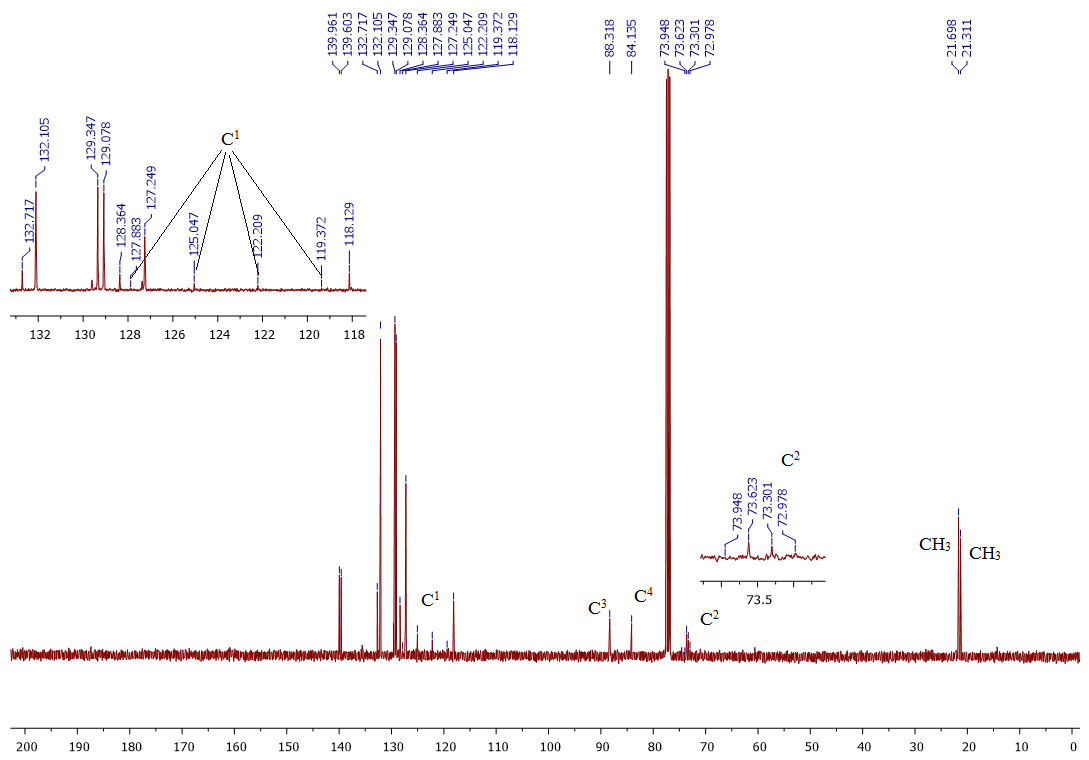


Figure S99. 13C-NMR spectrum of the compound **1o** (CDCl3, 100 MHz).


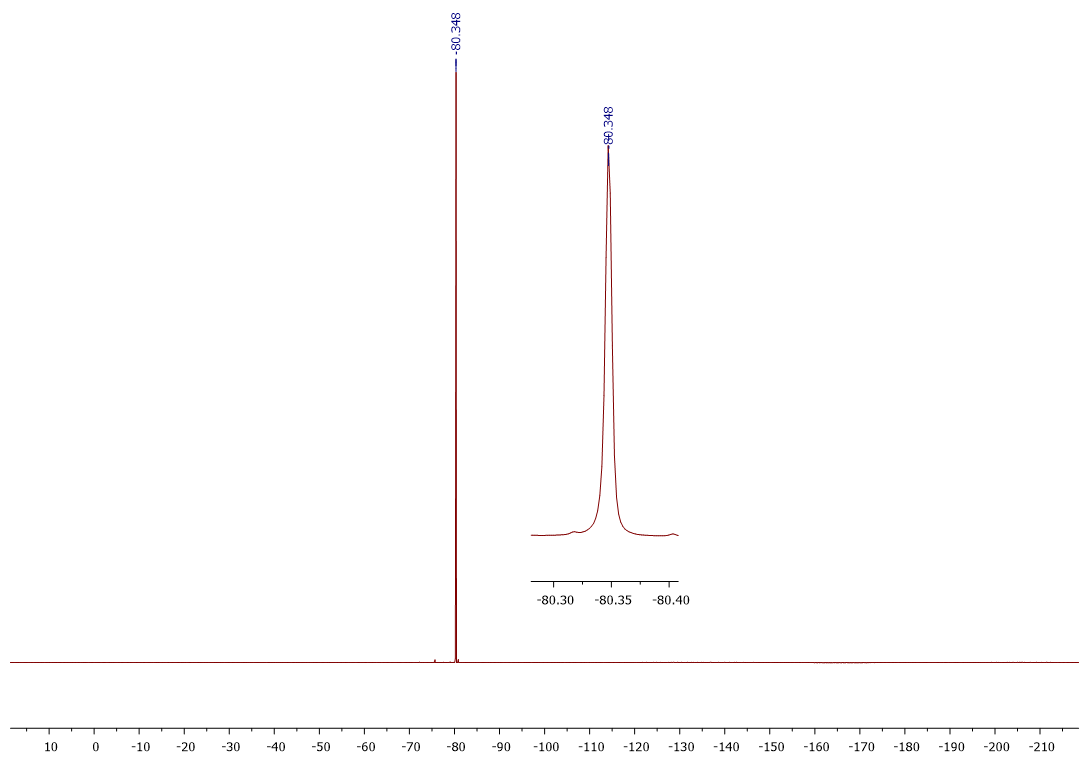


Figure S100. 19F-NMR spectrum of the compound **1o** (CDCl3, 376 MHz).

Figure S101. 1Н-NMR spectrum of the compound **1p** (CDCl3, 400 MHz).

Figure S102. 13C-NMR spectrum of the compound **1p** (CDCl3, 100 MHz).

Figure S103. 19F-NMR spectrum of the compound **1p** (CDCl3, 376 MHz).

Figure S104. 1Н-NMR spectrum of the compound **1q** (CDCl3, 400 MHz).

Figure S105. 13C-NMR spectrum of the compound **1q** (CDCl3, 100 MHz).

Figure S106. 19F-NMR spectrum of the compound **1q** (CDCl3, 376 MHz).

Figure S107. 1Н-NMR spectrum of the compound **1r** (CDCl3, 400 MHz).

Figure S108. 13C-NMR spectrum of the compound **1r** (CDCl3, 100 MHz).

Figure S109. 19F-NMR spectrum of the compound **1r** (CDCl3, 376 MHz).

Figure S110. 1Н-NMR spectrum of the compound **2a** (CDCl3, 400 MHz).

Figure S111. 13C-NMR spectrum of the compound **2a** (CDCl3, 100 MHz).

Figure S112. 19F-NMR spectrum of the compound **2a** (CDCl3, 376 MHz).

Harom.

Harom.

Harom.

Harom.

C2H

Figure S113. 1Н-NMR spectrum of the compound **4aa** (CDCl3, 400 MHz).

C1

C1

CF3

Figure S114. 13C-NMR spectrum of the compound **4aa** (CDCl3, 100 MHz).

Figure S115. DEPT spectrum of the compound **4aa** (CDCl3, 100 MHz).

Figure S116. 19F-NMR spectrum of the compound **4aa** (CDCl3, 376 MHz).

Harom.

Harom.

Harom.

Harom.

Harom.

Harom.

C2H

CH3

Figure S117. 1Н-NMR spectrum of the compound **4ab** (CDCl3, 400 MHz).

CF3

CH3

C1

C1

Figure S118. 13C-NMR spectrum of the compound **4ab** (CDCl3, 100 MHz).

CH3

Figure S119. DEPT spectrum of the compound **4ab** (CDCl3, 100 MHz).

Figure S120. 19F-NMR spectrum of the compound **4ab** (CDCl3, 376 MHz).

Harom

Harom

Harom

Harom

Harom

C2H

CH3

Figure S121. 1Н-NMR spectrum of the compound **4ac** (CDCl3, 400 MHz).

CF3

C1

C1

CH3

Figure S122. 13C-NMR spectrum of the compound **4ac** (CDCl3, 100 MHz).

Figure S123. 19F-NMR spectrum of the compound **4ac** (CDCl3, 376 MHz).

Harom.

C2H

Harom.

Harom.

CH3

Harom.

Harom.

Harom.

Harom.

Harom.

Harom.

C2H

CH3

Figure S124. 1Н-NMR spectrum of the compounds **4ad** and **6a** (CDCl3, 400 MHz).

CF3

C1

C1

CH3

Figure S125. 13C-NMR spectrum of the compound **4ad** (CDCl3, 100 MHz).

CH3

Figure S126. DEPT spectrum of the compound **4ad** (CDCl3, 100 MHz).

CF3

CF3

CF3

CF3

Figure S127. 19F-NMR spectrum of the compounds **4ad** and **6a** (CDCl3, 376 MHz).

Figure S128. NOESY H-F spectrum of the compound **4ad** (CDCl3, 400 MHz).

Harom.

Harom.

Harom.

C2H

Harom.

Harom.

Figure S129. 1Н-NMR spectrum of the compound **4ae** (CDCl3, 400 MHz).

C1

C1

CF3

Figure S130. 13C-NMR spectrum of the compound **4ae** (CDCl3, 100 MHz).

Figure S131. DEPT spectrum of the compound **4ae** (CDCl3, 100 MHz).

Figure S132. 19F-NMR spectrum of the compound **4ae** (CDCl3, 376 MHz).

Harom.

Harom.

Harom.

Harom.

C2H

Figure S133. 1Н-NMR spectrum of the compound **4af** (CDCl3, 400 MHz).

C1

C1

CF3

Figure S134. 13C-NMR spectrum of the compound **4af** (CDCl3, 100 MHz).

Figure S135. 19F-NMR spectrum of the compound **4af** (CDCl3, 376 MHz).

Harom.

Harom.

Harom.

Harom.

Harom.

Harom.

C2H

Figure S136. 1Н-NMR spectrum of the compound **4ag** (CDCl3, 400 MHz).

C1

C1

CF3

Figure S137. 13C-NMR spectrum of the compound **4ag** (CDCl3, 100 MHz).

Figure S138. DEPT spectrum of the compound **4ag** (CDCl3, 100 MHz).

Figure S139. 19F-NMR spectrum of the compound **4ag** (CDCl3, 376 MHz).

C2H

Harom.

Harom.

Harom.

Harom.

Harom.

Harom.

Figure S140. 1Н-NMR spectrum of the compound **4ah** (CDCl3, 400 MHz).

C1

C1

CF3

Figure S141. 13C-NMR spectrum of the compound **4ah** (CDCl3, 100 MHz).

Figure S142. DEPT spectrum of the compound **4ah** (CDCl3, 100 MHz).

Figure S143. 19F-NMR spectrum of the compound **4ah** (CDCl3, 376 MHz).

Harom.

Harom.

Harom.

Harom.

Harom.

Harom.

Harom.

Harom.

Harom.

Harom.

Harom.

Harom.

Harom.

CH3

CH3

C2H

C2H

Figure S144. 1Н-NMR spectrum of the compounds **4ai** and **5aa** (CDCl3, 400 MHz).

CF3

CF3

C1

C1

C1

C1

CH3

CH3

CH3

Figure S145. 13C-NMR spectrum of the compounds **4ai** and **5aa** (CDCl3, 100 MHz).

CH3

CH3

CH3

CH3

Figure S146. DEPT spectrum of the compounds **4ai** and **5aa** (CDCl3, 100 MHz).

CF3

CF3

CF3

CF3

Figure S147. 19F-NMR spectrum of the compounds **4ai** and **5aa** (CDCl3, 376 MHz).

Figure S148. COSY H-H spectrum of the compounds**4ai** and **5aa** (CDCl3, 400 MHz).

Figure S149. NOESY H-H spectrum of the compounds**4ai**, **5aa** (CDCl3, 400 MHz).

Figure S150. NOESY H-F spectrum of the compounds **4ai**, **5aa** (CDCl3, 400 MHz).

Harom.

Harom.

Harom.

Harom.

C7H

Harom.

Harom.

C5H

C5H

Harom.

Harom.

C2H

C2H

CH3

CH3

CH3

CH3

Figure S151. 1Н-NMR spectrum of the compounds **4aj** and **5ab** (CDCl3, 400 MHz).

CF3

CF3

C1

C1

C1

CH3

CH3

CH3

CH3

CH3

C1

CH3

Figure S152. 13C-NMR spectrum of the compounds **4aj** and **5ab** (CDCl3, 100 MHz).

CH3

CH3

CH3

CH3

CH3

CH3

Figure S153. DEPT spectrum of the compounds **4aj** and **5ab** (CDCl3, 100 MHz).

CF3

CF3

CF3

CF3

Figure S154. 19F-NMR spectrum of the compounds **4aj** and **5ab** (CDCl3, 376 MHz).

Figure S155. NOESY H-H spectrum of the compounds **4aj**, **5ab** (CDCl3, 400 MHz).

Figure S156. NOESY H-F spectrum of the compounds **4aj**, **5ab** (CDCl3, 400 MHz).

C2H

Harom.

Harom.

Harom.

Harom.

Figure S157. 1Н-NMR spectrum of the compound **4ak** (CDCl3, 400 MHz).

C1

CF3

C1

Figure S158. 13C-NMR spectrum of the compound **4ak** (CDCl3, 100 MHz).

Figure S159. DEPT spectrum of the compound **4ak** (CDCl3, 100 MHz).

Figure S160. 19F-NMR spectrum of the compound **4ak** (CDCl3, 376 MHz).

Harom.

Harom.

Harom.

Harom.

C2H

Harom.

Figure S161. 1Н-NMR spectrum of the compound **4al** (CDCl3, 400 MHz).

CF3

C1

C1

Figure S162. 13C-NMR spectrum of the compound **4al** (CDCl3, 100 MHz).

Figure S163. DEPT spectrum of the compound **4al** (CDCl3, 100 MHz).

Figure S164. 19F-NMR spectrum of the compound **4al** (CDCl3, 376 MHz).

Harom.

Harom.

Harom.

Harom.

Harom.

Harom.

C2H

Figure S165. 1Н-NMR spectrum of the compound **4am** (CDCl3, 400 MHz).

C1

C1

CF3

Figure S166. 13C-NMR spectrum of the compound **4am** (CDCl3, 100 MHz).

Figure S167. DEPT spectrum of the compound **4am** (CDCl3, 100 MHz).

Figure S168. 19F-NMR spectrum of the compound **4am** (CDCl3, 376 MHz).

Harom.

C7H

Harom.

Harom.

Harom.

C7H

Harom.

Harom.

C2H

Figure S169. 1Н-NMR spectrum of the compound **4an** (CDCl3, 400 MHz).

CF3

C1

C1

Figure S170. 13C-NMR spectrum of the compound **4an** (CDCl3, 100 MHz).

Figure S171. DEPT spectrum of the compound **4an** (CDCl3, 100 MHz).

Figure S172. 19F-NMR spectrum of the compound **4an** (CDCl3, 376 MHz).

Figure S173. NOESY H-H spectrum of the compound **4an** (CDCl3, 400 MHz).

Figure S174. NOESY H-F spectrum of the compound **4an** (CDCl3, 400 MHz).

Harom.

C2H

Harom.

Harom.

Harom.

Figure S175. 1Н-NMR spectrum of the compound **4ao** (CDCl3, 400 MHz).

CF3

C1

C1

Figure S176. 13C-NMR spectrum of the compound **4ao** (CDCl3, 100 MHz).

Figure S177. DEPT spectrum of the compound **4ao** (CDCl3, 100 MHz).

Figure S178. 19F-NMR spectrum of the compound **4ao** (CDCl3, 376 MHz).

C6H

C5H

Harom.

C6H

C5H

Harom.

C2H

CH3

CH3

Figure S179. 1Н-NMR spectrum of the compound **4ba** (CDCl3, 400 MHz).

CF3

C1

CH3

C1

CH3

CH3

Figure S180. 13C-NMR spectrum of the compound **4ba** (CDCl3, 100 MHz).

Figure S181. 19F-NMR spectrum of the compound **4ba** (CDCl3, 376 MHz).

Figure S182. NOESY H-H spectrum of the compound **4ba** (CDCl3, 400 MHz).

Figure S183. NOESY H-F spectrum of the compound **4ba** (CDCl3, 400 MHz).

Harom.

Harom.

Harom.

C5H

C6H

CH3

C6H

C5H

C2H

CH3

Figure S184. 1Н-NMR spectrum of the compound **4bb** (CDCl3, 400 MHz).

C1

C1

CH3

CH3

CH3

CF3

Figure S185. 13C-NMR spectrum of the compound **4bb** (CDCl3, 100 MHz).

CH3

CH3

CH3

Figure S186. DEPT spectrum of the compound **4bb** (CDCl3, 100 MHz).

Figure S187. 19F-NMR spectrum of the compound **4bb** (CDCl3, 376 MHz).

Harom.

C5H

Harom.

C6H

Harom.

C6H

C5H

C2H

CH3

CH3

CH3

Figure S188. 1Н-NMR spectrum of the compound **4bc** (CDCl3, 400 MHz).

CF3

C1

C1

CH3

CH3

CH3

Figure S189. 13C-NMR spectrum of the compound **4bc** (CDCl3, 100 MHz).

CH3

CH3

CH3

Figure S190. DEPT spectrum of the compound **4bc** (CDCl3, 100 MHz).

Figure S191. 19F-NMR spectrum of the compound **4bc** (CDCl3, 376 MHz).

Figure S192. NOESY H-H spectrum of the compound **4bc** (CDCl3, 400 MHz).

Figure S193. NOESY H-F spectrum of the compound **4bc** (CDCl3, 400 MHz).

C6H

Harom.

Harom.

C6H

C2H

CH3

Harom.

CH3

Figure S194. 1Н-NMR spectrum of the compound **4bd** (CDCl3, 400 MHz).

CF3

CH3

CH3

C1

C1

CH3

CH3

Figure S195. 13C-NMR spectrum of the compound **4bd** (CDCl3, 100 MHz).

CH3

CH3

CH3

CH3

Figure S196. DEPT spectrum of the compound **4bd** (CDCl3, 100 MHz).

Figure S197. 19F-NMR spectrum of the compound **4bd** (CDCl3, 376 MHz).

C2H

C6H

C5H

Harom.

C6H

C5H

Harom.

CH3

CH3

Figure S198. 1Н-NMR spectrum of the compound **4be** (CDCl3, 400 MHz).

CF3

CH3

CH3

C1

C1

CH3

Figure S199. 13C-NMR spectrum of the compound **4be** (CDCl3, 100 MHz).

CH3

CH3

CH3

Figure S200. DEPT spectrum of the compound **4be** (CDCl3, 100 MHz).

Figure S201. 19F-NMR spectrum of the compound **4be** (CDCl3, 376 MHz).

Figure S202. NOESY H-H spectrum of the compound **4be** (CDCl3, 400 MHz).

Figure S203. NOESY H-F spectrum of the compound **4be** (CDCl3, 400 MHz).

C6H

C5H

C2H

Harom.

C6H

CH3

CH3

Harom.

C5H

Harom.

Figure S204. 1Н-NMR spectrum of the compound **4bf** (CDCl3, 400 MHz).

CH3

CH3

CH3

C1

CF3

C1

Figure S205. 13C-NMR spectrum of the compound **4bf** (CDCl3, 100 MHz).

CH3

CH3

CH3

Figure S206. DEPT spectrum of the compound **4bf** (CDCl3, 100 MHz).

Figure S207. 19F-NMR spectrum of the compound **4bf** (CDCl3, 376 MHz).

Figure S208. NOESY H-H spectrum of the compound **4bf** (CDCl3, 400 MHz).

Fig S209. NOESY H-F spectrum of the compound **4bf** (CDCl3, 400 MHz).

Harom.

Harom.

Harom.

Harom.

Harom.

C6H

C5H

C5H

C6H

C2H

CH3

CH3

Figure S210. 1Н-NMR spectrum of the compound **4bg** (CDCl3, 400 MHz).

CF3

CH3

CH3

CH3

C1

C1

Figure S211. 13C-NMR spectrum of the compound **4bg** (CDCl3, 100 MHz).

CH3

CH3

Figure S212. DEPT spectrum of the compound **4bg** (CDCl3, 100 MHz).

Figure S213. 19F-NMR spectrum of the compound **4bg** (CDCl3, 376 MHz).

C6H

C5H

Harom.

Harom.

Harom.

Harom.

C5H

C6H

C2H

CH3

CH3

Figure S214. 1Н-NMR spectrum of the compound **4bh** (CDCl3, 400 MHz).

CH3

CH3

C1

C1

CH3

CF3

Figure S215. 13C-NMR spectrum of the compound **4bh** (CDCl3, 100 MHz).

CH3

CH3

CH3

Figure S216. DEPT spectrum of the compound **4bh** (CDCl3, 100 MHz).

Figure S217. 19F-NMR spectrum of the compound **4bh** (CDCl3, 376 MHz).

C2H

Harom.

C6H

C5H

C6H

C5H

C2H

CH3

CH3

Harom.

Figure S218. 1Н-NMR spectrum of the compound **4bi** (CDCl3, 400 MHz).

CF3

C1

C1

CH3

CH3

CH3

Figure S219. 13C-NMR spectrum of the compound **4bi** (CDCl3, 100 MHz).

CH3

CH3

CH3

Figure S220. DEPT spectrum of the compound **4bi** (CDCl3, 100 MHz).

Figure S221. 19F-NMR spectrum of the compound **4bi** (CDCl3, 376 MHz).

Figure S222. NOESY H-H spectrum of the compound **4bi** (CDCl3, 400 MHz).

Figure S223. NOESY H-F spectrum of the compound **4bi** (CDCl3, 400 MHz).

Harom.

Harom.

Harom.

Harom.

Harom.

Harom.

Harom.

C5H

C6H

C2H

C2H

CH3

CH3

CH3

CH3

CH3

CH3

CH3

CH3

Figure S224. 1Н-NMR spectrum of the compounds **4bj** and **5ba** (CDCl3, 400 MHz).

CF3

CF3

C1

C1

C1

C1

CH3

CH3

CH3

CH3

CH3

CH3

CH3

CH3

CH3

Figure S225. 13C-NMR spectrum of the compounds **4bj** and **5ba** (CDCl3, 100 MHz).

Figure S226. DEPT spectrum of the compounds **4bj** and **5ba** (CDCl3, 100 MHz).

CH3

CH3

CH3

CH3

CH3

CH3

CH3

CH3

CH3

CF3

CF3

CF3

CF3

Figure S227. 19F-NMR spectrum of the compounds **4bj** and **5ba** (CDCl3, 376 MHz).

Figure S228. NOESY H-H spectrum of the compounds **4bj**, **5ba** (CDCl3, 400 MHz).

Figure S229. NOESY H-F spectrum of the compounds **4bj**, **5ba** (CDCl3, 400 MHz).

C6H

C5H

C6H

C5H

Harom.

C2H

Harom.

CH3

CH3

Figure S230. 1Н-NMR spectrum of the compound **4bk** (CDCl3, 400 MHz).

CF3

C1

C1

CH3

CH3

CH3

Figure S231. 13C-NMR spectrum of the compound **4bk** (CDCl3, 100 MHz).

CH3

CH3

CH3

Figure S232. DEPT spectrum of the compound **4bk** (CDCl3, 100 MHz).

Figure S233. 19F-NMR spectrum of the compound **4bk** (CDCl3, 376 MHz).

Figure S234. NOESY H-H spectrum of the compound **4bk** (CDCl3, 400 MHz).

Figure S235. NOESY H-F spectrum of the compound **4bk** (CDCl3, 400 MHz).

Harom.

Harom.

C5H

C6H

C2H

CH3

CH3

C6H

C5H

Harom.

Figure S236. 1Н-NMR spectrum of the compound **4bl** (CDCl3, 400 MHz).

CF3

C1

C1

CH3

CH3

CH3

Figure S237. 13C-NMR spectrum of the compound **4bl** (CDCl3, 100 MHz).

CH3

CH3

CH3

Figure S238. DEPT spectrum of the compound **4bl** (CDCl3, 100 MHz).

Figure S239. 19F-NMR spectrum of the compound **4bl** (CDCl3, 376 MHz).

Figure S240. NOESY H-H spectrum of the compound **4bl** (CDCl3, 400 MHz).

Figure S241. NOESY H-F spectrum of the compound **4bl** (CDCl3, 400 MHz).

Harom.

Harom.

Harom.

Harom.

Harom.

Harom.

Harom.

C2H

CH3

CH3

Figure S242. 1Н-NMR spectrum of the compound **4bm** (CDCl3, 400 MHz).

CF3

CH3

CH3

CH3

C1

C1

Figure S243. 13C-NMR spectrum of the compound **4bm** (CDCl3, 100 MHz).

CH3

CH3

CH3

Figure S244. DEPT spectrum of the compound **4bm** (CDCl3, 100 MHz).

Figure S245. 19F-NMR spectrum of the compound **4bm** (CDCl3, 376 MHz).

CH3

CH3

C6H

C5H

Harom.

Harom.

Harom.

C6H

C5H

C2H

Figure S246. 1Н-NMR spectrum of the compound **4bn** (CDCl3, 400 MHz).

CH3

CH3

C1

CH3

C1

CF3

Figure S247. 13C-NMR spectrum of the compound **4bn** (CDCl3, 100 MHz).

Figure S248. 19F-NMR spectrum of the compound **4bn** (CDCl3, 376 MHz).

Figure S249. NOESY H-H spectrum of the compound **4bn** (CDCl3, 400 MHz).

Figure S250. NOESY H-F spectrum of the compound **4bn** (CDCl3, 400 MHz).

Harom.

Harom.

Harom.

Harom.

C6H

Harom.

Harom.

C6H

Harom.

C2H

C2H

CH3

CH3

CH3

CH3

CH3

CH3

CH3

CH3

CH3

CH3

CH3

Figure S251. 1Н-NMR spectrum of the compounds **4bo** and **5bc** (CDCl3, 400 MHz).

CF3

C1

C1

CH3

CH3

CH3

CF3

CH3

CH3

CH3

CH3

CH3

C1

C1

CH3

Figure S252. 13C-NMR spectrum of the compounds **4bo** and **5bc** (CDCl3, 100 MHz).

CH3

CH3

CH3

CH3

CH3

CH3

CH3

CH3

CH3

CH3

Figure S253. DEPT spectrum of the compounds **4bo** and **5bc** (CDCl3, 100 MHz).

CF3

CF3

CF3

CF3

Figure S254. 19F-NMR spectrum of the compounds **4bo** and **5bc** (CDCl3, 376 MHz).

Figure S255. NOESY H-H spectrum of the compounds **4bo**, **5bc** (CDCl3, 400 MHz).

Figure S256. NOESY H-F spectrum of the compounds **4bo**, **5bc** (CDCl3, 400 MHz).

C6H

C5H

Harom.

Harom.

Harom.

Harom.

C6H

C5H

C2H

CH3

CH3

Figure S257. 1Н-NMR spectrum of the compound **4bp** (CDCl3, 400 MHz).

C1

CH3

CH3

CH3

C1

CF3

Figure S258. 13C-NMR spectrum of the compound **4bp** (CDCl3, 100 MHz).

CH3

CH3

CH3

Figure S259. DEPT spectrum of the compound **4bp** (CDCl3, 100 MHz).

Figure S260. 19F-NMR spectrum of the compound **4bp** (CDCl3, 376 MHz).

Figure S261. NOESY H-H spectrum of the compound **4bp** (CDCl3, 400 MHz).

Figure S262. NOESY H-F spectrum of the compound **4bp** (CDCl3, 400 MHz).

Harom.

Harom.

Harom.

C5H

C6H

C2H

CH3

CH3

C6H

C5H

Figure S263. 1Н-NMR spectrum of the compound **4bq** (CDCl3, 400 MHz).

C1

CH3

CH3

CH3

CF3

C1

Figure S264. 13C-NMR spectrum of the compound **4bq** (CDCl3, 100 MHz).

CH3

CH3

CH3

Figure S265. DEPT spectrum of the compound **4bq** (CDCl3, 100 MHz).

Figure S266. 19F-NMR spectrum of the compound **4bq** (CDCl3, 376 MHz).

Figure S267. NOESY H-H spectrum of the compound **4bq** (CDCl3, 400 MHz).

Figure S268. NOESY H-F spectrum of the compound **4bq** (CDCl3, 400 MHz).

Harom.

Harom.

Harom.

Harom.

Harom.

Harom.

Harom.

Harom.

Harom.

C2H

C2H

C5H

CH3

CH3

CH3

CH3

Figure S269. 1Н-NMR spectrum of the compounds **4ca** and **5ca** (CDCl3, 400 MHz).

CF3

CF3

C1

C1

CH3

CH3

CH3

CH3

CH3

CH3

CH3

C1

C1

Figure S270. 13C-NMR spectrum of the compounds **4ca** and **5ca** (CDCl3, 100 MHz).

CH3

CH3

CH3

CH3

CH3

CH3

CH3

CH3

Figure S271. DEPT spectrum of the compounds **4ca** and **5ca** (CDCl3, 100 MHz).

CF3

CF3

Figure S272. 19F-NMR spectrum of the compounds **4ca** and **5ca** (CDCl3, 376 MHz).

Figure S273. NOESY H-H spectrum of the compounds **4ca**, **5ca** (CDCl3, 400 MHz).

Figure S274. NOESY H-F spectrum of the compounds **4ca**, **5ca** (CDCl3, 400 MHz).

Harom.

Harom.

Harom.

Harom.

Harom.

C7H

Harom.

Harom.

Harom.

C5H

Harom.

Harom.

C5H

C2H

C2H

CH3

CH3

CH3

CH3

Figure S275. 1Н-NMR spectrum of the compounds **4cb** and **5cb** (CDCl3, 400 MHz).

CF3

CF3

C1

C1

C1

C1

CH3

CH3

CH3

CH3

CH3

CH3

Figure S276. 13C-NMR spectrum of the compounds **4cb** and **5cb** (CDCl3, 100 MHz).

CH3

CH3

CH3

CH3

CH3

CH3

CH3

Figure S277. DEPT spectrum of the compounds **4cb** and **5cb** (CDCl3, 100 MHz).

CH3

CH3

CH3

CH3

Figure S278. 19F-NMR spectrum of the compounds **4cb** and **5cb** (CDCl3, 376 MHz).

Figure S279. COSY H-H spectrum of the compounds **4cb** and **5cb** (CDCl3, 400 MHz).

Figure S280. NOESY H-H spectrum of the compounds **4cb**, **5cb** (CDCl3, 400 MHz).

Figure S281. NOESY H-F spectrum of the compounds **4cb**, **5cb** (CDCl3, 400 MHz).

Harom.

Harom.

Harom.

Harom.

Harom.

Harom.

Harom.

C5H

C5H

C2H

C2H

CH3

CH3

CH3

CH3

Harom.

Harom.

Figure S282. 1Н-NMR spectrum of the compounds **4cc** and **5cc** (CDCl3, 400 MHz).

CF3

CF3

CH3

CH3

CH3

CH3

CH3

CH3

CH3

C1

C1

C1

C1

Figure S283. 13C-NMR spectrum of the compounds **4cc** and **5cc** (CDCl3, 100 MHz).

CH3

CH3

CH3

CH3

CH3

CH3

CH3

CH3

Figure S284. DEPT spectrum of the compounds **4cc** and **5cc** (CDCl3, 100 MHz).

CF3

CF3

Figure S285. 19F-NMR spectrum of the compounds **4cc** and **5cc** (CDCl3, 376 MHz).

Figure S286. NOESY H-H spectrum of the compounds **4cc**, **5cc** (CDCl3, 400 MHz).

Figure S287. NOESY H-F spectrum of the compounds **4cc**, **5cc** (CDCl3, 400 MHz).

Harom.

Harom.

Harom.

Harom.

Harom.

Harom.

Harom.

C7H

Harom.

Harom.

C5H

Harom.

C2H

C5H

C2H

CH3

CH3

CH3

CH3

Harom.

Figure S288. 1Н-NMR spectrum of the compounds **4cd** and **5cd** (CDCl3, 400 MHz).

CF3

CF3

C1

C1

C1

CH3

CH3

CH3

CH3

CH3

Figure S289. 13C-NMR spectrum of the compounds **4cd** and **5cd** (CDCl3, 100 MHz).

CF3

CF3

Figure S290. 19F-NMR spectrum of the compounds **4cd** and **5cd** (CDCl3, 376 MHz).

Figure S291. NOESY H-H spectrum of the compounds **4cd**, **5cd** (CDCl3, 400 MHz).

Figure S292. NOESY H-F spectrum of the compounds **4cd**, **5cd** (CDCl3, 400 MHz).

Harom.

Harom.

Harom.

Harom.

Harom.

Harom.

C7H

C5H

Harom.

Harom.

C5H

C2H

C2H

CH3

CH3

CH3

CH3

Figure S293. 1Н-NMR spectrum of the compounds **4ce** and **5ce** (CDCl3, 400 MHz).

CF3

CF3

C1

C1

C1

C1

CH3

CH3

CH3

CH3

Figure S294. 13C-NMR spectrum of the compounds **4ce** and **5ce** (CDCl3, 100 MHz).

CH3

CH3

CH3

CH3

Figure S295. DEPT spectrum of the compounds **4ce** and **5ce** (CDCl3, 100 MHz).

CF3

CF3

Figure S296. 19F-NMR spectrum of the compounds **4ce** and **5ce** (CDCl3, 376 MHz).

C7H

CH3

C7H

C5H

C5H

Harom.

Harom.

Harom.

Harom.

Harom.

Harom.

C2H

CH3

Figure S297. 1Н-NMR spectrum of the compound **4cf** (CDCl3, 400 MHz).

CF3

C1

C1

CH3

CH3

Figure S298. 13C-NMR spectrum of the compound **4cf** (CDCl3, 100 MHz).

CH3

CH3

Figure S299. DEPT spectrum of the compound **4cf** (CDCl3, 100 MHz).

Figure S300. 19F-NMR spectrum of the compound **4cf** (CDCl3, 376 MHz).

Harom.

Harom.

C2H

Harom.

Harom.

Harom.

Harom.

CH3

CH3

Harom.

Figure S301. 1Н-NMR spectrum of the compound **4cg** (CDCl3, 400 MHz).

CH3

CH3

C1

C1

CF3

Figure S302. 13C-NMR spectrum of the compound **4cg** (CDCl3, 100 MHz).

CH3

CH3

Figure S303. DEPT spectrum of the compound **4cg** (CDCl3, 100 MHz).

Figure S304. 19F-NMR spectrum of the compound **4cg** (CDCl3, 376 MHz).

Harom.

Harom.

Harom.

Harom.

Harom.

Harom.

Harom.

Harom.

Harom.

Harom.

Harom.

Harom.

C5H

C5H

CH3

CH3

CH3

CH3

C2H

C2H

Figure S305. 1Н-NMR spectrum of the compounds **4ch** and **5cf** (CDCl3, 400 MHz).

CF3

CF3

CH3

CH3

CH3

CH3

CH3

C1

C1

C1

C1

CH3

CH3

Figure S306. 13C-NMR spectrum of the compounds **4ch** and **5cf** (CDCl3, 100 MHz).

CH3

CH3

CH3

CH3

Figure S307. DEPT spectrum of the compounds **4ch** and **5cf** (CDCl3, 100 MHz).

CH3

CH3

CH3

CH3

Figure S308. 19F-NMR spectrum of the compounds **4ch** and **5cf** (CDCl3, 376 MHz).

Figure S309. NOESY H-H spectrum of the compounds **4ch**, **5cf** (CDCl3, 400 MHz).

Figure S310. NOESY H-F spectrum of the compounds **4ch**, **5cf** (CDCl3, 400 MHz).

Harom.

Harom.

C7H

Harom.

Harom.

C2H

CH3

CH3

Figure S311. 1Н-NMR spectrum of the compound **4ci** (CDCl3, 400 MHz).

CF3

CH3

CH3

C1

C1

Figure S312. 13C-NMR spectrum of the compound **4ci** (CDCl3, 100 MHz).

CH3

CH3

Figure S313. DEPT spectrum of the compound **4ci** (CDCl3, 100 MHz).

Figure S314. 19F-NMR spectrum of the compound **4ci** (CDCl3, 376 MHz).

Figure S315. NOESY H-H spectrum of the compound **4ci** (CDCl3, 400 MHz).

Figure S316. NOESY H-F spectrum of the compound **4ci** (CDCl3, 400 MHz).

Harom.

Harom.

Harom.

Harom.

C7H

C5H

Harom.

C2H

CH3

CH3

Harom.

Figure S317. 1Н-NMR spectrum of the compound **4cj** (CDCl3, 400 MHz).

CF3

C1

C1

CH3

CH3

Figure S318. 13C-NMR spectrum of the compound **4cj** (CDCl3, 100 MHz).

CH3

CH3

Figure S319. DEPT spectrum of the compound **4cj** (CDCl3, 100 MHz).

Figure S320. 19F-NMR spectrum of the compound **4cj** (CDCl3, 376 MHz).

Figure S321. NOESY H-H spectrum of the compound **4cj** (CDCl3, 400 MHz).

Figure S322. NOESY H-F spectrum of the compound **4cj** (CDCl3, 400 MHz).

Harom.

Harom.

Harom.

Harom.

C7H

C5H

C2H

CH3

CH3

Figure S323. 1Н-NMR spectrum of the compound **4ck** (CDCl3, 400 MHz).

CF3

C1

C1

CH3

CH3

Figure S324. 13C-NMR spectrum of the compound **4ck** (CDCl3, 100 MHz).

CH3

CH3

Figure S325. DEPT spectrum of the compound **4ck** (CDCl3, 100 MHz).

Figure S326. 19F-NMR spectrum of the compound **4ck** (CDCl3, 376 MHz)

Harom.

Harom.

Harom.

Harom.

Harom.

C2H

CH3

CH3

Figure S327. 1Н-NMR spectrum of the compound **4cl** (CDCl3, 400 MHz).

CF3

CH3

CH3

C1

C1

Figure S328. 13C-NMR spectrum of the compound **4cl** (CDCl3, 100 MHz).

CH3

CH3

Figure S329. DEPT spectrum of the compound **4cl** (CDCl3, 100 MHz).

Figure S330. 19F-NMR spectrum of the compound **4cl** (CDCl3, 376 MHz).

Harom.

Harom.

C2H

Harom.

Harom.

Harom.

Harom.

CH3

CH3

Figure S331. 1Н-NMR spectrum of the compound **4cm** (CDCl3, 400 MHz).

CF3

CH3

CH3

C1

C1

Figure S332. 13C-NMR spectrum of the compound **4cm** (CDCl3, 100 MHz).

Figure S333. 19F-NMR spectrum of the compound **4cm** (CDCl3, 376 MHz).

Harom

Harom

Harom

Harom

Harom

C2H

Harom

CH3

CH3

CH3

CH3

CH3

C2H

Harom

Harom

Figure S334. 1Н-NMR spectrum of the compounds **4da** and **4ea** (CDCl3, 400 MHz).

C1

CH3

CH3

CH3

CF3

C1

Figure S335. 13C-NMR spectrum of the compound **4da** (CDCl3, 100 MHz).

CH3

CH3

CH3

Figure S336. DEPT spectrum of the compound **4da** (CDCl3, 100 MHz).

CF3

CF3

CF3

CF3

Figure S337. 19F-NMR spectrum of the compounds **4da** and **4ea** (CDCl3, 376 MHz).

Figure S338. NOESY H-H spectrum of the compounds **4da** and **4ea** (CDCl3, 400 MHz).

Figure S339. NOESY H-F spectrum of the compounds **4da**, **4ea** (CDCl3, 400 MHz).

CH3

CH3

CH3

CH3

CH3

CH3

CH3

CH3

CH3

C6H

C5H

Harom

Harom

Harom

C2H

C6H

C2H

Harom

C5H

Harom

Harom

Figure S340. 1Н-NMR spectrum of the compounds **4db** and **4eb** (CDCl3, 400 MHz).

CF3

C1

CH3

CH3

CH3

C1

Figure S341. 13C-NMR spectrum of the compound **4db** (CDCl3, 100 MHz).

CH3

CH3

CH3

Figure S342. DEPT spectrum of the compound **4db** (CDCl3, 100 MHz).

CF3

CF3

CF3

CF3

Figure S343. 19F-NMR spectrum of the compounds **4db** and **4eb** (CDCl3, 376 MHz).

Figure S344. NOESY H-H spectrum of the compounds **4db**, **4eb** (CDCl3, 400 MHz).

Figure S345. NOESY H-F spectrum of the compounds **4db**, **4eb** (CDCl3, 400 MHz).

CH3

CH3

CH3

CH3

CH3

CH3

CH3

CH3

CH3

Harom

Harom

Harom

Harom

Harom

Harom

Harom

Harom

C2H

C2H

Harom

Harom

Harom

Harom

Figure S346. 1Н-NMR spectrum of the compounds **4dc** and **4ec** (CDCl3, 400 MHz).

CF3

CH3

CH3

CH3

C1

C1

Figure S347. 13C-NMR spectrum of the compound **4dc** (CDCl3, 100 MHz).

CH3

CH3

CH3

Figure S348. DEPT spectrum of the compound **4dc** (CDCl3, 100 MHz).

CF3

CF3

CF3

CF3

Figure S349. 19F-NMR spectrum of the compounds **4dc** and **4ec** (CDCl3, 376 MHz).

Figure S350. NOESY H-H spectrum of the compounds **4dc**, **4ec** (CDCl3, 400 MHz).

Figure S351. NOESY H-F spectrum of the compounds **4dc**, **4ec** (CDCl3, 400 MHz).

Harom

Harom

Harom

Harom

Harom

Harom

C6H

C5H

C2H

C6H

C5H

C2H

CH3

CH3

CH3

CH3

Figure S352. 1Н-NMR spectrum of the compounds **4dd** and **4ed** (CDCl3, 400 MHz).

CF3

CH3

CH3

CH3

CH3

CH3

C1

C1

Figure S353. 13C-NMR spectrum of the compound **4dd** (CDCl3, 100 MHz).

CH3

CH3

CH3

CH3

CH3

Figure S354. DEPT spectrum of the compound **4dd** (CDCl3, 100 MHz).

CF3

CF3

CF3

CF3

Figure S355. 19F-NMR spectrum of the compounds **4dd** and **4ed** (CDCl3, 376 MHz).

Figure S356. NOESY H-H spectrum of the compounds **4dd**, **4ed** (CDCl3, 400 MHz).

Figure S357. NOESY H-F spectrum of the compounds **4dd**, **4ed** (CDCl3, 400 MHz).

Harom

Harom

Harom

Harom

C6H

C6H

C5H

C5H

C2H

CH3

CH3

CH3

CH3

CH3

Harom

Harom

C2H

Figure S358. 1Н-NMR spectrum of the compounds **4de** and **4ee** (CDCl3, 400 MHz).

CF3

CH3

CH3

CH3

C1

C1

Figure S359. 13C-NMR spectrum of the compound **4de** (CDCl3, 100 MHz).

CH3

CH3

CH3

Figure S360. DEPT spectrum of the compound **4de** (CDCl3, 100 MHz).

CF3

CF3

CF3

CF3

Figure S361. 19F-NMR spectrum of the compounds **4de** and **4ee** (CDCl3, 376 MHz).

Figure S362. NOESY H-H spectrum of the compounds **4de**, **4ee** (CDCl3, 400 MHz).

Figure S363. NOESY H-F spectrum of the compounds **4de**, **4ee** (CDCl3, 400 MHz).

Harom

Harom

Harom

Harom

Harom

Harom

Harom

Harom

Harom

C2H

Harom

C2H

CH3

CH3

CH3

CH3

CH3

CH3

Figure S364. 1Н-NMR spectrum of the compounds **4df**, **4ef** (CDCl3, 400 MHz).

C1

C1

CH3

CH3

CH3

CF3

Figure S365. 13C-NMR spectrum of the compound **4df** (CDCl3, 100 MHz).

CH3

CH3

CH3

Figure S366. DEPT spectrum of the compound **4df** (CDCl3, 100 MHz).

CF3

CF3

CF3

CF3

Figure S367. 19F-NMR spectrum of the compounds **4df** and **4ef** (CDCl3, 376 MHz).

Figure S368. NOESY H-H spectrum of the compounds **4df**, **4ef** (CDCl3, 400 MHz).

Figure S369. NOESY H-F spectrum of the compounds **4df** and **4ef** (CDCl3, 400 MHz).

Harom

Harom

Harom

Harom

Harom

Harom

Harom

Harom

Harom

Harom

Harom

C2H

C2H

CH3

CH3

CH3

CH3

CH3

CH3

CH3

CH3

Harom

Figure S370. 1Н-NMR spectrum of the compounds **4dg** and **4eg** (CDCl3, 400 MHz).

CF3

CF3

CH3

CH3

CH3

CH3

CH3

CH3

CH3

C1

C1

C1

C1

Figure S371. 13C-NMR spectrum of the compounds **4dg** and **4eg** (CDCl3, 100 MHz).

CH3

CH3

CH3

CH3

Figure S372. DEPT spectrum of the compounds **4dg** and **4eg** (CDCl3, 100 MHz).

CF3

CF3

CF3

CF3

Fig. S373. 19F-NMR spectrum of the compounds **4dg**, **4eg** (DMSO-d6, 376 MHz, 100 °C).

Harom.

Harom.

Harom.

Harom.

Harom.

Harom.

Harom.

Harom.

Harom.

Harom.

Harom.

Harom.

C2H

C2H

CH3

CH3

CH3

CH3

CH3

CH3

CH3

CH3

Figure S374. 1Н-NMR spectrum of the compounds **4dh** and **4eh** (CDCl3, 400 MHz).

CF3

CF3

CH3

CH3

CH3

CH3

CH3

C1

C1

C1

CH3

CH3

CH3

Figure S375. 13C-NMR spectrum of the compounds **4dh** and **4eh** (CDCl3, 100 MHz).

CH3

CH3

CH3

CH3

CH3

CH3

CH3

Figure S376. DEPT spectrum of the compounds **4dh** and **4eh** (CDCl3, 100 MHz).

CF3

CF3

CF3

CF3

Figure S377. 19F-NMR spectrum of the compounds **4dh** and **4eh** (CDCl3, 376 MHz).

Harom

Harom

C2H

C2H

Harom

Harom

Harom

Harom

CH3

CH3

CH3

CH3

CH3

CH3

CH3

CH3

Harom

Harom

Figure S378. 1Н-NMR spectrum of the compounds **4di** and **4ei** (CDCl3, 400 MHz).

CF3

C1

CH3

CH3

CH3

C1

Figure S379. 13C-NMR spectrum of the compound **4di** (CDCl3, 100 MHz).

CH3

CH3

CH3

Figure S380. DEPT spectrum of the compound **4di** (CDCl3, 100 MHz).

CF3

CF3

CF3

CF3

Figure S381. 19F-NMR spectrum of the compounds **4di** and **4ei** (CDCl3, 376 MHz).

Figure S382. NOESY H-H spectrum of the compounds **4di**, **4ei** (CDCl3, 400 MHz).

Figure S383. NOESY H-F spectrum of the compounds **4di** and **4ei** (CDCl3, 400 MHz).

Harom

Harom

Harom

Harom

Harom

Harom

C5H

C2H

C6H

C2H

CH3

CH3

CH3

CH3

CH3

CH3

Figure S384. 1Н-NMR spectrum of the compounds **4dj** and **4ej** (CDCl3, 400 MHz).

CF3

CH3

CH3

CH3

C1

C1

Figure S385. 13C-NMR spectrum of the compound **4dj** (CDCl3, 100 MHz).

CH3

CH3

CH3

Figure S386. DEPT spectrum of the compound **4dj** (CDCl3, 100 MHz).

CF3

CF3

CF3

CF3

Figure S387. 19F-NMR spectrum of the compounds **4dj** and **4ej** (CDCl3, 376 MHz).

Harom

CH3

CH3

CH3

CH3

CH3

CH3

C2H

C2H

C6H

C5H

Harom

Harom

Harom

Harom

Harom

Harom

Harom

Figure S388. 1Н-NMR spectrum of the compounds **4dk** and **4ek** (CDCl3, 400 MHz).

CF3

C1

C1

CH3

CH3

CH3

Figure S389. 13C-NMR spectrum of the compound **4dk** (CDCl3, 100 MHz).

CH3

CH3

CH3

Figure S390. DEPT spectrum of the compound **4dk** (CDCl3, 100 MHz).

CF3

CF3

CF3

CF3

Figure S391. 19F-NMR spectrum of the compounds **4dk** and **4ek** (CDCl3, 376 MHz).

Figure S392. NOESY H-H spectrum of the compounds **4dk**, **4ek** (CDCl3, 400 MHz).

Harom

Harom

Harom

Harom

Harom

Harom

Harom

Harom

Harom

Harom

C5H

C6H

C2H

C2H

C6H

C2H

C5H

C2H

CH3

CH3

CH3

CH3

CH3

CH3

CH3

CH3

CH3

CH3

Figure S393. 1Н-NMR spectrum of the compounds **4dl** and **4el** (CDCl3, 400 MHz).

CF3

CH3

CH3

CH3

C1

C1

Figure S394. 13C-NMR spectrum of the compound **4dl** (CDCl3, 100 MHz).

CH3

CH3

CH3

Figure S395. DEPT spectrum of the compound **4dl** (CDCl3, 100 MHz).

CF3

CF3

CF3

CF3

Figure S396. 19F-NMR spectrum of the compounds **4dl** and **4el** (CDCl3, 376 MHz).

C2H

C2H

C6H

C5H

Harom

Harom

CH3

CH3

CH3

CH3

CH3

C5H

C6H

Harom

Harom

Harom

Harom

Harom

Figure S397. 1Н-NMR spectrum of the compounds **4dm** and **4em** (CDCl3, 400 MHz).

CF3

CF3

C1

C1

CH3

CH3

CH3

CH3

CH3

C1

Figure S398. 13C-NMR spectrum of the compounds **4dm** and **4em** (CDCl3, 100 MHz).

CH3

CH3

CH3

CH3

CH3

Figure S399. DEPT spectrum of the compounds **4dm** and **4em** (CDCl3, 100 MHz).

CF3

CF3

CF3

CF3

Figure S400. 19F-NMR spectrum of the compounds **4dm** and **4em** (CDCl3, 376 MHz).

Figure S401. NOESY H-H spectrum of the compounds **4dm**, **4em** (CDCl3, 400 MHz).

Figure S402. NOESY H-F spectrum of the compounds **4dm**, **4em** (CDCl3, 400 MHz).

C2H

Harom

Harom

Harom

Harom

Harom

Harom

Harom

Harom

Harom

Harom

C2H

CH3

CH3

CH3

CH3

Figure S403. 1Н-NMR spectrum of the compounds **4dn** and **4en** (CDCl3, 400 MHz).

CF3

C1

C1

CH3

CH3

CH3

Figure S404. 13C-NMR spectrum of the compound **4dn** (CDCl3, 100 MHz).

CH3

CH3

CH3

Figure S405. DEPT spectrum of the compound **4dn** (CDCl3, 100 MHz).

CF3

CF3

CF3

CF3

Figure S406. 19F-NMR spectrum of the compounds **4dn** and **4en** (CDCl3, 376 MHz).

CH3

Harom

Harom

Harom

Harom

Harom

Harom

Harom

Harom

Harom

Harom

Harom

Harom

C2H

C2H

CH3

CH3

CH3

CH3

Figure S407. 1Н-NMR spectrum of the compounds **4do** and **4eo** (CDCl3, 400 MHz).

CF3

C1

C1

CH3

CH3

CH3

Figure S408. 13C-NMR spectrum of the compound **4do** (CDCl3, 100 MHz).

CH3

CH3

CH3

Figure S409. DEPT spectrum of the compound **4do** (CDCl3, 100 MHz).

CF3

CF3

CF3

CF3

Figure S410. 19F-NMR spectrum of the compounds **4do** and **4eo** (CDCl3, 376 MHz).
